# Supplementary material for: The coordination chemistry of phosphinidene sulfides. Synthesis and catalytic properties of Pd4 and Pt4 clusters
Source: Royal Society of Chemistry journal article supplement (doi:10.1039/c8dt02648c), 2018-01-01
Supplement: c8dt02648c2.pdf [file c8dt02648c2.pdf]

## Supporting Information

### **The coordination chemistry of phosphinidene sulfides. Synthesis and catalytic properties of Pd<sub>4</sub> and Pt<sub>4</sub> clusters.**

Jinkui Chai<sup>a</sup>, Rongqiang Tian<sup>a\*</sup>, Di Wu<sup>a</sup>, Donghui Wei<sup>a</sup>, Qun Xu<sup>b</sup>, Zheng Duan<sup>a\*</sup>,  
François Mathey<sup>a\*</sup>

*<sup>a</sup>College of Chemistry and Molecular Engineering, International Phosphorus Laboratory, International Joint Research Laboratory for Functional Organophosphorus Materials of Henan Province, Zhengzhou University, Zhengzhou 450001, P. R. China*

*<sup>b</sup>College of Materials Science and Engineering, Zhengzhou University, Zhengzhou 450052, China*

## Table of Contents

### CONTENTS

|                                                           |     |
|-----------------------------------------------------------|-----|
| 1. General Experimental Details.....                      | S3  |
| 2. Experimental Procedures and Characterization Data..... | S3  |
| 3. X-Ray Diffraction Data.....                            | S7  |
| 4. NMR Spectra.....                                       | S42 |

## General Experimental Details

All reactions were performed under nitrogen using solvents dried by standard methods. NMR spectra were obtained using Bruker AV300 spectrometer. All spectra were recorded in CDCl<sub>3</sub>. All coupling constants (*J* values) are reported in hertz (Hz). Chemical shifts are expressed in parts per million (ppm) downfield from internal TMS. HRMS spectra were obtained on an Agilent 1290-6540 UHPLC Q-ToF HR-MS spectrometer. Element analyses were performed on a Thermo Flash EA 1112 automatic element analyzer. X-ray crystallographic analyses were performed on an Oxford diffraction Gemini E diffractometer. Silica gel (200-300 mesh) was used for the chromatographic separations. 1-R-3,4-dimethylphosphole were prepared according to the literature method (R. Tian and F. Mathey, *Organometallics*, 2010, **29**, 1873). All commercially available reagents were used without further purification.

## Experimental Procedures and Characterization Data

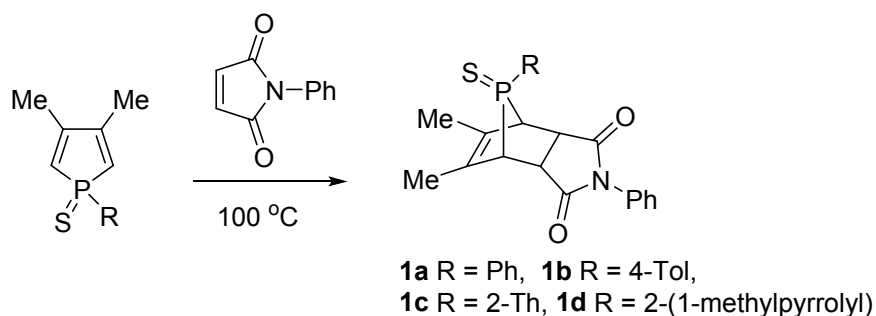

A solution of N-Phenylmaleimide (623 mg, 3.6mmol) and 1-R-3,4-dimethylphospholesulfide (3 mmol) in toluene (30 mL) was stirred at 100 °C for 3 h (<sup>31</sup>P NMR: δ = 106.8 ppm for **1a**, δ = 106.8 ppm for **1b**; δ = 92.8 ppm for **1c**; δ = 90.4 ppm for **1d**). After evaporation of the solvent, the residue was chromatographed on silica gel with CH<sub>2</sub>Cl<sub>2</sub> as eluent to give pure **1 a-d**

**1a**, yellowish solid, 1.05 g, 2.67mmol, 89%. <sup>31</sup>P NMR (121 MHz, CDCl<sub>3</sub>): δ 106.8; <sup>1</sup>H NMR (300 MHz, CDCl<sub>3</sub>) δ 1.63(d, *J* = 2.1 Hz, 6H), 3.55 -3.58(m, 2H), 4.31 -4.35(t, *J* = 1.2 Hz, 2H), 7.06- 7.10(m, 2H), 7.37 -7.62(m, 8H); <sup>13</sup>C NMR(75 MHz, CDCl<sub>3</sub>): δ 15.19(s, CH<sub>3</sub>), 15.23(s, CH<sub>3</sub>), 44.97(d, *J*<sub>CP</sub>= 18.6 Hz, CH), 52.00(d, *J*<sub>CP</sub>= 50.9 Hz, CH), 126.39(s, CH, Ph), 128.80(s, CH, Ph), 128.94(d, *J*<sub>CP</sub>= 2.8 Hz, CH,Ph), 129.29(s, CH, NPh), 129.89(d, *J*<sub>CP</sub>= 13.8 Hz, CH, NPh), 130.46(d, *J*<sub>CP</sub>= 80.4 Hz, C, Ph), 131.60(d, *J*<sub>CP</sub>= 3.1 Hz, CH, Ph), 132.70(d, *J*<sub>CP</sub>= 6.9 Hz, C, NPh), 175.47(d, *J*<sub>CP</sub>= 15.4 Hz, CO). HR-MS (ESI) calcd for C<sub>22</sub>H<sub>20</sub>NO<sub>2</sub>PS: [M+H]<sup>+</sup>, 394.1025; found *m/z* 394.1030.

**1b**, yellowish solid, 952 mg, 2.33 mmol, 78%. <sup>31</sup>P NMR (121 MHz, CDCl<sub>3</sub>): δ 106.8; <sup>1</sup>H NMR (300 MHz, CDCl<sub>3</sub>) δ 1.63 (d, *J* = 1.8 Hz, 6H), 2.39 (s, 3H), 3.52 - 3.54 (m, 2H), 4.31 (s, 2H), 7.07 - 7.10 (m, 2H), 7.23 - 7.26 (m, 2H), 7.39 - 7.51 (m, 5H); <sup>13</sup>C NMR (75 MHz, CDCl<sub>3</sub>): δ 15.22 (d, *J*<sub>CP</sub>= 3.8 Hz, Me), 21.54 (d, *J*<sub>CP</sub>= 1.1 Hz, CH<sub>3</sub>), 45.07 (d, *J*<sub>CP</sub>= 18.6 Hz, CH), 52.12 (d, *J*<sub>CP</sub>= 51.1 Hz, CH), 126.41 (s, CH, NPh), 126.82 (d, *J*<sub>CP</sub>= 82.2 Hz, C, Ph), 128.88 (s, CH, NPh), 129.27 (s, CH, NPh), 129.59 (d, *J*<sub>CP</sub>= 12.4 Hz, CH, Ph), 129.81 (d, *J*<sub>CP</sub>= 45.4 Hz, CH, Ph), 131.61 (s, C, NPh), 132.61 (d, *J*<sub>CP</sub>= 7.0 Hz, C), 142.19

(d,  $J_{CP}$  = 3.0 Hz, C, Ph), 175.53 (d,  $J_{CP}$  = 15.4 Hz, CO). HR-MS (ESI) calcd for  $C_{23}H_{22}NO_2PS$ :  $[M+H]^+$ , 408.1182; found  $m/z$  408.1187.

**1c**, yellowish solid, 622.4 mg, 1.6 mmol, 52%.  $^{31}P$  NMR (121 MHz,  $CDCl_3$ ):  $\delta$  92.8;  $^1H$  NMR (300 MHz,  $CDCl_3$ )  $\delta$  1.83 (d,  $J$  = 1.8 Hz, 6H), 3.33 - 3.35 (m, 2H), 4.18 (d,  $J$  = 0.9 Hz, 2H), 7.03 - 7.05 (m, 2H), 7.12 - 7.19 (m, 1H), 7.36 - 7.43 (m, 3H), 7.96 - 7.63 (m, 1H), 8.05 - 8.09 (m, 1H);  $^{13}C$  NMR (75 MHz,  $CDCl_3$ ):  $\delta$  15.91 (d,  $J_{CP}$  = 3.8 Hz, Me), 44.97 (d,  $J_{CP}$  = 19.7 Hz, CH), 53.94 (d,  $J_{CP}$  = 56.1 Hz, CH), 123.16 (d,  $J_{CP}$  = 79.9 Hz, C, Th), 126.41 (s, CH, NPh), 128.00 (d,  $J_{CP}$  = 16.4 Hz, CH, Th), 128.96 (s, CH, NPh), 129.32 (s, CH, NPh), 131.57 (s, C, NPh), 133.89 (d,  $J_{CP}$  = 5.9 Hz, C), 135.67 (s, CH, Th), 144.33 (d,  $J_{CP}$  = 13.9 Hz, CH, Th), 175.34 (d,  $J_{CP}$  = 16.6 Hz, CO). HR-MS (ESI) calcd for  $C_{20}H_{18}NO_2PS_2$ :  $[M+H]^+$ , 400.0593; found  $m/z$  400.0589.

**1d**, yellowish solid, 760.3 mg, 1.9 mmol, 64%.  $^{31}P$  NMR (121 MHz,  $CDCl_3$ ):  $\delta$  90.4;  $^1H$  NMR (300MHz,  $CDCl_3$ )  $\delta$  1.70 (d,  $J$  = 2.1 Hz, 6H), 3.50 - 3.52 (m, 2H), 3.89 (s, 3H), 4.28 - 4.29 (t, 2H), 6.12 - 6.15 (m, 1H), 6.40 - 6.43 (m, 1H), 6.82 - 6.85 (m, 1H), 7.07 - 7.10 (m, 2H), 7.37 - 7.48 (m, 3H);  $^{13}C$  NMR (75 MHz,  $CDCl_3$ ):  $\delta$  15.26 (d,  $J_{CP}$  = 3.8 Hz, Me), 36.16 (d,  $J_{CP}$  = 2.6 Hz,  $CH_3$ ), 44.81 (d,  $J_{CP}$  = 20.2 Hz, CH), 53.04 (d,  $J_{CP}$  = 54.3 Hz, CH), 108.73 (d,  $J_{CP}$  = 11.4 Hz, CH, Py), 117.47 (d,  $J_{CP}$  = 104.3 Hz, C, Py), 118.37 (d,  $J_{CP}$  = 12.3 Hz, CH, Py), 126.38 (s, CH, NPh), 128.88 (s, CH, NPh), 129.27 (s, CH, NPh), 129.33 (s, CH, Py), 131.56 (s, C, NPh), 132.24 (d,  $J_{CP}$  = 6.9 Hz, C), 175.46 (d,  $J_{CP}$  = 16.1 Hz, CO). HR-MS (ESI) calcd for  $C_{10}H_{11}PS$ :  $[M+H]^+$ , 397.1134; found  $m/z$  397.1142.

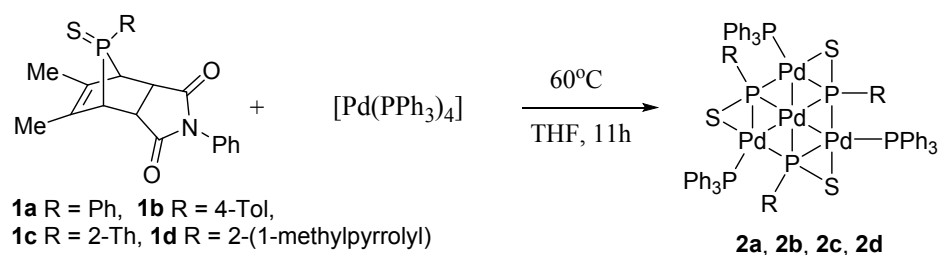

Tetrakis(triphenylphosphine)palladium(1.39 g, 1.2mmol) was added to a solution of **1 a-d**(0.9 mmol) in THF (10 mL) at 60 °C and stirred for 11 h in an 50mL-Schlenk flask. After evaporation of the solvent, the residue was chromatographed on silica gel with petroleum ether/ $CH_2Cl_2$  (2:1) as eluent to give pure **2 a-d**. Single Crystal for X-ray analysis was grown from a solution of the compound **2** in dichloromethane/ethyl acetate.

**2a**, wine red solid, 283.6 mg, 0.17 mmol, 58%.  $^{31}P$  NMR (121 MHz,  $CDCl_3$ ):  $\delta$  25.2 (q,  $J_{PP}$  = 26.1 Hz), 229.2 (q,  $J_{PP}$  = 23.8 Hz);  $^1H$  NMR (300 MHz,  $CDCl_3$ )  $\delta$  6.53 (bs, 6H), 6.62 (t,  $J$  = 7.5 Hz, 6H), 6.89 (t,  $J$  = 6.9 Hz, 3H), 7.20-7.38 (m, 27H), 7.50 - 7.55 (t,  $J$  = 8.1 Hz, 18H);  $^{13}C$  NMR (75 MHz,  $CDCl_3$ ):  $\delta$  126.80 (bs, CH, Ph), 128.16 (d,  $J$  = 7.8 Hz, CH,  $PPh_3$ ), 129.57 (s, CH,  $PPh_3$ ), 131.17 (bs, CH, Ph), 134.02 (d,  $J_{CP}$  = 13.1 Hz, CH,  $PPh_3$ ), 134.81 (d,  $J_{CP}$  = 40.7 Hz, C,  $PPh_3$ ), 145.07 (s, C, Ph). Elemental analysis calcd (%) for  $C_{72}H_{60}P_6Pd_4S_3$ : C 52.96, H 3.70; found C 52.46, H 3.61.

**2b**, wine red solid, 270.8 mg, 0.16 mmol, 54%.  $^{31}P$  NMR (121 MHz,  $CDCl_3$ ):  $\delta$  24.9 (q,  $J_{PP}$  = 27.6 Hz),

230.4 (q,  $J_{PP} = 23.0$  Hz);  $^1\text{H}$  NMR (300 MHz,  $\text{CDCl}_3$ )  $\delta$  2.12 (s, 9H), 6.47 (s, 12H, Ph), 7.22 - 7.34 (m, 27H), 7.49 - 7.55 (mt, 18H);  $^{13}\text{C}$  NMR (75 MHz,  $\text{CDCl}_3$ ):  $\delta$  21.15 (s, CH, Me), 127.51 (s, CH, Ph), 128.12 (d,  $J = 7.2$  Hz, CH,  $\text{PPh}_3$ ), 129.49 (s, CH,  $\text{PPh}_3$ ), 131.18 (bs, CH, Ph), 134.05 (d,  $J = 12.4$  Hz, CH,  $\text{PPh}_3$ ), 134.90 (d,  $J_{CP} = 38.5$  Hz, C,  $\text{PPh}_3$ ), 138.21 (s, C, Ph), 142.28 (s, C, Ph). Elemental analysis calcd (%) for  $\text{C}_{75}\text{H}_{66}\text{P}_6\text{Pd}_4\text{S}_3$ : C 53.78, H 3.97; found C 53.36, H 4.10.

**2c**, wine red solid, 237.3 mg, 0.14 mmol, 48%.  $^{31}\text{P}$  NMR (121 MHz,  $\text{CDCl}_3$ ):  $\delta$  25.2 (q,  $J_{PP} = 26.7$  Hz), 206.8 (q,  $J_{PP} = 25.3$  Hz);  $^1\text{H}$  NMR (300 MHz,  $\text{CDCl}_3$ )  $\delta$  6.06 (bs, 3H), 6.49 (t,  $J = 6.0$  Hz 3H), 7.17 - 7.61 (m, 48H);  $^{13}\text{C}$  NMR (75 MHz,  $\text{CDCl}_3$ ):  $\delta$  127.42 (bs, CH, Th), 128.22 (d,  $J = 9.8$  Hz, CH, Ph), 129.64 (s, CH, Ph), 131.33 (s, CH, Th), 132.38 (s, C Th), 134.14 (d,  $J_{CP} = 23.4$  Hz, CH, Ph), 134.55 (d,  $J_{CP} = 38.5$  Hz, C, Ph). Elemental analysis calcd (%) for  $\text{C}_{66}\text{H}_{54}\text{P}_6\text{Pd}_4\text{S}_6$ : C 48.01, H 3.30; found C 47.78, H 3.49.

**2d**, wine red solid, 204.6 mg, 0.13 mmol, 42%.  $^{31}\text{P}$  NMR (121 MHz,  $\text{CDCl}_3$ ):  $\delta$  27.1 (q,  $J_{PP} = 26.2$  Hz), 195.1 (q,  $J_{PP} = 24.8$  Hz);  $^1\text{H}$  NMR (300 MHz,  $\text{CDCl}_3$ )  $\delta$  2.05 (s, 3H, Me), 5.82-5.84 (m, 3H), 6.10 (bs, 3H), 6.60 (t,  $J = 1.8$  Hz 3H), 7.25 - 7.62 (m, 45H, Ph);  $^{13}\text{C}$  NMR (75 MHz,  $\text{CDCl}_3$ ):  $\delta$  34.01 (s, Me), 127.50 (s, CH), 128.17 (d,  $J = 9.8$  Hz, CH, Ph), 128.18 (d,  $J = 3.2$  Hz, CH), 129.52 (s, CH, Ph), 133.92 (d,  $J_{CP} = 14.0$  Hz, CH, Ph), 133.92 (d,  $J_{CP} = 3.8$  Hz, CH), 134.59 (d,  $J_{CP} = 37.3$  Hz, CH, Ph), 135.99 (s, C). Elemental analysis calcd (%) for  $\text{C}_{68}\text{H}_{60}\text{N}_3\text{P}_6\text{Pd}_4\text{S}_3$ : C 50.20, H 3.72; found C 50.14, H 3.89.

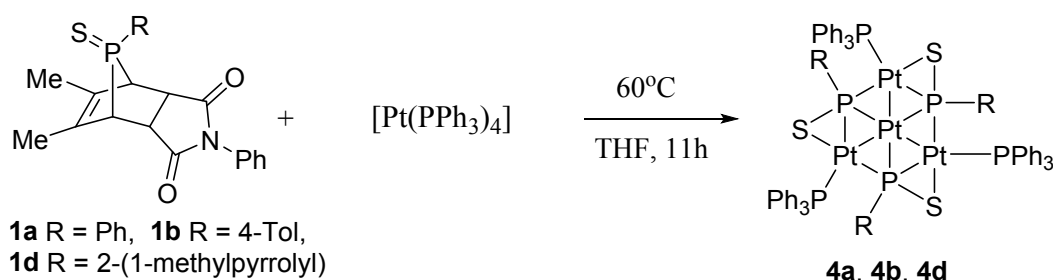

Tetrakis(triphenylphosphine)platinum (497.7 mg, 0.4 mmol for **2a**; 995.4 mg, 0.8 mmol for **2b** and **2d**) was added to a solution of **1** (117.9 mg, 0.3 mmol for **1a**; 244.2 mg, 0.6 mmol for **1b**; 237.6 mg, 0.6 mmol for **1d**) in THF (10 mL) at 60 °C and stirred for 11 h. After evaporation of the solvent, the residue was chromatographed on silica gel with petroleum ether/ $\text{CH}_2\text{Cl}_2$  (2:1) as eluent to give pure **4a**, **4b** and **4d**. Single Crystal for X-ray analysis was grown from a solution of the compound **4a** in dichloromethane/ethyl acetate.

**4a**, yellow solid, 99.3 mg, 0.05 mmol, 51%.  $^{31}\text{P}$  NMR (121 MHz,  $\text{CDCl}_3$ ):  $\delta$  19.5 (q,  $J_{PP} = 28.3$  Hz,  $J_{PPt} = 5326.7$  Hz), 165.3 (q,  $J_{PP} = 28.2$  Hz,  $J_{PPt} = 3893.2$  Hz,  $J_{PPt} = 1757.1$  Hz);  $^1\text{H}$  NMR (300 MHz,  $\text{CDCl}_3$ )  $\delta$  6.61 - 6.65 (m, 12H), 6.83 - 6.84 (m, 3H), 7.28 - 7.35 (m, 27H), 7.55 - 7.61 (m, 18H);  $^{13}\text{C}$  NMR (75 MHz,  $\text{CDCl}_3$ ):  $\delta$  126.49 (d,  $J = 11.2$  Hz, CH, Ph), 128.03 (d,  $J = 10.8$  Hz, CH,  $\text{PPh}_3$ ), 129.92 (s, CH,  $\text{PPh}_3$ ), 131.87 (d,  $J = 15.6$  Hz, CH, Ph), 133.97 (d,  $J = 12.5$  Hz, CH,  $\text{PPh}_3$ ), 134.61 (d,  $J = 53.6$  Hz C,  $\text{PPh}_3$ ). Elemental analysis calcd (%) for  $\text{C}_{72}\text{H}_{60}\text{P}_6\text{Pt}_4\text{S}_3$ : C 43.51, H 3.04; found C: 43.14, H: 3.43.

**4b**, yellow solid, 202.8 mg, 0.1 mmol, 49%.  $^{31}\text{P}$  NMR (121 MHz,  $\text{CDCl}_3$ ):  $\delta$  19.4 (q,  $J_{PP} = 28.7$  Hz,  $J_{PPt} = 5328.5$  Hz), 166.1 (q,  $J_{PP} = 29.0$  Hz,  $J_{PPt} = 3857.6$  Hz,  $J_{PPt} = 1714.0$  Hz);  $^1\text{H}$  NMR (300 MHz,  $\text{CDCl}_3$ )  $\delta$  2.11 (s, 9H), 6.46 - 6.64 (m, 12H), 7.23 - 7.33 (m, 27H), 7.55 - 7.61 (m, 18H);  $^{13}\text{C}$  NMR (75 MHz,

CDCl<sub>3</sub>):  $\delta$  21.11(s, CH, Me), 127.30 (d,  $J$  = 11.8 Hz, CH, Ph), 128.01 (d,  $J$  = 10.7 Hz, CH, PPh<sub>3</sub>), 129.88 (s, CH, PPh<sub>3</sub>), 131.81-132.03 (bs, CH, Ph), 133.73 (s, C, Ph), 134.02 (d,  $J$  = 12.4 Hz, CH, PPh<sub>3</sub>), 134.70 (d,  $J$  = 54.2 Hz, C, PPh<sub>3</sub>), 138.07 (s, C, Ph). Elemental analysis calcd (%) for C<sub>75</sub>H<sub>66</sub>P<sub>6</sub>Pt<sub>4</sub>S<sub>3</sub>: C: 44.38, H: 3.28; found C: 44.39, H: 3.49.

**4d**, yellow solid, 170.3 mg, 0.09 mmol, 43%. <sup>31</sup>P NMR (121 MHz, CDCl<sub>3</sub>):  $\delta$  22.0 (q,  $J_{\text{PP}}= 29.4$  Hz,  $J_{\text{PPt}}= 5307.8$  Hz), 132.2 (q,  $J_{\text{PP}}= 29.3$  Hz,  $J_{\text{PPt}}= 3847.8$  Hz,  $J_{\text{PPt}}= 1731.6$  Hz); <sup>1</sup>H NMR (300 MHz, CDCl<sub>3</sub>)  $\delta$  2.10 (s, 9H), 5.81 (bs, 3H), 6.08 (bs, 3H), 6.65 (bs, 3H), 7.24 - 7.31 (m, 27H), 7.58 - 7.64 (m, 18H); <sup>13</sup>C NMR (75 MHz, CDCl<sub>3</sub>):  $\delta$  33.76 (s, CH, Me), 106.86 (s, CH, Py), 118.45 (s, CH, Py), 128.08 (d,  $J$  = 10.7 Hz, CH, PPh<sub>3</sub>), 129.91 (s, CH, PPh<sub>3</sub>), 133.60 (s, C, Py), 133.86 (d,  $J$  = 12.5 Hz, C, PPh<sub>3</sub>), 134.42 (d,  $J$  = 53.6 Hz, C, PPh<sub>3</sub>). Elemental analysis calcd (%) for C<sub>68</sub>H<sub>60</sub>P<sub>6</sub>N<sub>3</sub>Pt<sub>4</sub>S<sub>3</sub>: C 41.22, H 3.05; found C 41.13, H 3.18.

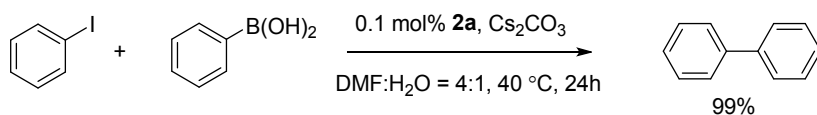

A solution of iodobenzene (2 mmol, 223  $\mu$ L), phenylboronic acid (3 mmol, 366 mg), Pd cluster **2a** (0.002 mmol, 3.3 mg) and Cs<sub>2</sub>CO<sub>3</sub> (6 mmol, 1.95 g) in 5 mL DMF/H<sub>2</sub>O (4/1) mixture was stirred at 40 °C for 24h. The organic components were extracted with CH<sub>2</sub>Cl<sub>2</sub>×3. Combined the organic phase and the solvent was removed under vacuum. The residue was chromatographed on silica gel with petroleum ether as eluent to give pure biphenyl (306 mg, 1.98 mmol, 99%).

## X-Ray Diffraction Data

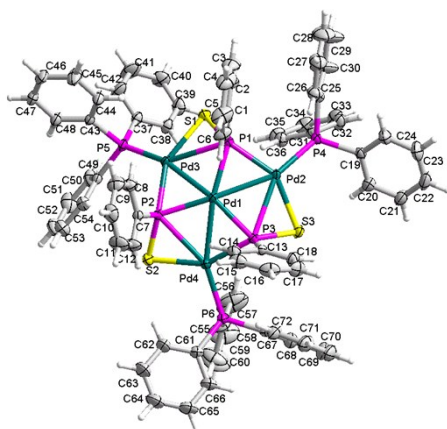

### 2a

**Table 1 Crystal data and structure refinement for 2a.**

|                                                |                                                                    |
|------------------------------------------------|--------------------------------------------------------------------|
| Empirical formula                              | $C_{72}H_{60}Pd_4S_3$                                              |
| Formula weight                                 | 1632.80                                                            |
| Temperature/K                                  | 293(2)                                                             |
| Crystal system                                 | monoclinic                                                         |
| Space group                                    | $C2/c$                                                             |
| a/Å                                            | 32.9703(4)                                                         |
| b/Å                                            | 15.48579(16)                                                       |
| c/Å                                            | 29.9766(4)                                                         |
| $\alpha/^\circ$                                | 90.00                                                              |
| $\beta/^\circ$                                 | 93.7902(11)                                                        |
| $\gamma/^\circ$                                | 90.00                                                              |
| Volume/Å <sup>3</sup>                          | 15271.7(3)                                                         |
| Z                                              | 8                                                                  |
| $\rho_{\text{calc}}/\text{cm}^3$               | 1.420                                                              |
| $\mu/\text{mm}^{-1}$                           | 1.171                                                              |
| F(000)                                         | 6512.0                                                             |
| Crystal size/mm <sup>3</sup>                   | 0.25 × 0.19 × 0.18                                                 |
| Radiation                                      | MoK $\alpha$ ( $\lambda = 0.71073$ )                               |
| 2 $\theta$ range for data collection/ $^\circ$ | 2.9 to 52.74                                                       |
| Index ranges                                   | $-41 \leq h \leq 39$ , $-19 \leq k \leq 18$ , $-37 \leq l \leq 33$ |
| Reflections collected                          | 72647                                                              |
| Independent reflections                        | 15598 [ $R_{\text{int}} = 0.0528$ , $R_{\text{sigma}} = 0.0424$ ]  |
| Data/restraints/parameters                     | 15598/0/766                                                        |

Goodness-of-fit on  $F^2$   
 Final R indexes [ $I \geq 2\sigma(I)$ ]  
 Final R indexes [all data]  
 Largest diff. peak/hole /  $e \text{ \AA}^{-3}$

1.004  
 $R_1 = 0.0341$ ,  $wR_2 = 0.0812$   
 $R_1 = 0.0471$ ,  $wR_2 = 0.0855$   
 0.61/-0.58

**Table 2 Bond Lengths for 2a.**

| Ato<br>m | Ato<br>m | Length/ $\text{\AA}$ | Ato<br>m | Ato<br>m | Length/ $\text{\AA}$ |
|----------|----------|----------------------|----------|----------|----------------------|
| C1       | C2       | 1.396(5)             | C45      | C46      | 1.358(6)             |
| C1       | C6       | 1.379(5)             | C46      | C47      | 1.349(6)             |
| C1       | P1       | 1.810(4)             | C47      | C48      | 1.383(5)             |
| C2       | C3       | 1.384(6)             | C49      | C50      | 1.390(5)             |
| C3       | C4       | 1.381(7)             | C49      | C54      | 1.391(5)             |
| C4       | C5       | 1.358(7)             | C49      | P5       | 1.827(4)             |
| C5       | C6       | 1.397(6)             | C50      | C51      | 1.392(6)             |
| C7       | C8       | 1.381(5)             | C51      | C52      | 1.367(8)             |
| C7       | C12      | 1.377(5)             | C52      | C53      | 1.389(8)             |
| C7       | P2       | 1.823(3)             | C53      | C54      | 1.392(6)             |
| C8       | C9       | 1.375(6)             | C55      | C56      | 1.368(7)             |
| C9       | C10      | 1.359(6)             | C55      | C60      | 1.382(7)             |
| C10      | C11      | 1.354(6)             | C55      | P6       | 1.819(4)             |
| C11      | C12      | 1.375(6)             | C56      | C57      | 1.386(7)             |
| C13      | C14      | 1.382(5)             | C57      | C58      | 1.332(10)            |
| C13      | C18      | 1.375(4)             | C58      | C59      | 1.350(10)            |
| C13      | P3       | 1.822(3)             | C59      | C60      | 1.382(9)             |
| C14      | C15      | 1.378(5)             | C61      | C62      | 1.361(6)             |
| C15      | C16      | 1.369(6)             | C61      | C66      | 1.367(5)             |
| C16      | C17      | 1.366(6)             | C61      | P6       | 1.838(4)             |
| C17      | C18      | 1.386(5)             | C62      | C63      | 1.372(7)             |
| C19      | C20      | 1.388(5)             | C63      | C64      | 1.339(7)             |
| C19      | C24      | 1.388(5)             | C64      | C65      | 1.358(7)             |
| C19      | P4       | 1.830(3)             | C65      | C66      | 1.373(6)             |
| C20      | C21      | 1.379(5)             | C67      | C68      | 1.385(5)             |
| C21      | C22      | 1.366(7)             | C67      | C72      | 1.367(5)             |
| C22      | C23      | 1.353(7)             | C67      | P6       | 1.832(3)             |
| C23      | C24      | 1.394(6)             | C68      | C69      | 1.404(6)             |
| C25      | C26      | 1.396(6)             | C69      | C70      | 1.357(7)             |
| C25      | C30      | 1.350(6)             | C70      | C71      | 1.376(7)             |
| C25      | P4       | 1.821(4)             | C71      | C72      | 1.381(6)             |
| C26      | C27      | 1.378(6)             | P1       | Pd1      | 2.2731(8)            |



|     |     |           |     |     |            |
|-----|-----|-----------|-----|-----|------------|
| C27 | C28 | 1.332(8)  | P1  | Pd2 | 2.2806(8)  |
| C28 | C29 | 1.343(10) | P1  | Pd3 | 2.8057(8)  |
| C29 | C30 | 1.402(8)  | P1  | S1  | 2.0212(12) |
| C31 | C32 | 1.386(5)  | P2  | Pd1 | 2.2944(8)  |
| C31 | C36 | 1.392(5)  | P2  | Pd3 | 2.2905(8)  |
| C31 | P4  | 1.825(4)  | P2  | Pd4 | 2.7056(8)  |
| C32 | C33 | 1.382(6)  | P2  | S2  | 2.0228(12) |
| C33 | C34 | 1.364(6)  | P3  | Pd1 | 2.2829(7)  |
| C34 | C35 | 1.368(6)  | P3  | Pd2 | 2.7405(8)  |
| C35 | C36 | 1.384(5)  | P3  | Pd4 | 2.2770(8)  |
| C37 | C38 | 1.386(5)  | P3  | S3  | 2.0151(11) |
| C37 | C42 | 1.386(5)  | P4  | Pd2 | 2.2865(8)  |
| C37 | P5  | 1.827(3)  | P5  | Pd3 | 2.2971(8)  |
| C38 | C39 | 1.369(5)  | P6  | Pd4 | 2.2946(9)  |
| C39 | C40 | 1.374(6)  | Pd1 | Pd2 | 2.6559(3)  |
| C40 | C41 | 1.367(6)  | Pd1 | Pd3 | 2.6517(3)  |
| C41 | C42 | 1.374(6)  | Pd1 | Pd4 | 2.6768(3)  |
| C43 | C44 | 1.370(5)  | Pd2 | S3  | 2.4121(8)  |
| C43 | C48 | 1.390(4)  | Pd3 | S1  | 2.3984(9)  |
| C43 | P5  | 1.823(3)  | Pd4 | S2  | 2.4166(8)  |
| C44 | C45 | 1.397(5)  |     |     |            |

**Table 3 Bond Angles for 2a.**

| Ato<br>m | Ato<br>m | Ato<br>m | Angle/°  | Ato<br>m | Ato<br>m | Ato<br>m | Angle/°    |
|----------|----------|----------|----------|----------|----------|----------|------------|
| C2       | C1       | P1       | 121.2(3) | C1       | P1       | Pd1      | 115.99(12) |
| C6       | C1       | C2       | 118.3(4) | C1       | P1       | Pd2      | 115.31(11) |
| C6       | C1       | P1       | 120.5(3) | C1       | P1       | Pd3      | 116.61(11) |
| C3       | C2       | C1       | 120.5(5) | C1       | P1       | S1       | 108.08(12) |
| C4       | C3       | C2       | 120.6(5) | Pd1      | P1       | Pd2      | 71.36(2)   |
| C5       | C4       | C3       | 119.3(5) | Pd1      | P1       | Pd3      | 61.90(2)   |
| C4       | C5       | C6       | 120.9(5) | Pd2      | P1       | Pd3      | 120.86(3)  |
| C1       | C6       | C5       | 120.5(4) | S1       | P1       | Pd1      | 115.36(5)  |
| C8       | C7       | P2       | 118.6(3) | S1       | P1       | Pd2      | 126.62(5)  |
| C12      | C7       | C8       | 117.4(3) | S1       | P1       | Pd3      | 56.83(3)   |
| C12      | C7       | P2       | 123.8(3) | C7       | P2       | Pd1      | 105.25(10) |
| C9       | C8       | C7       | 121.3(4) | C7       | P2       | Pd3      | 115.02(11) |
| C10      | C9       | C8       | 120.0(4) | C7       | P2       | Pd4      | 109.96(10) |
| C11      | C10      | C9       | 119.9(4) | C7       | P2       | S2       | 108.23(11) |
| C10      | C11      | C12      | 120.4(4) | Pd1      | P2       | Pd4      | 64.120(19) |

|     |     |     |          |     |     |     |            |
|-----|-----|-----|----------|-----|-----|-----|------------|
| C7  | C12 | C11 | 121.0(4) | Pd3 | P2  | Pd1 | 70.67(2)   |
| C14 | C13 | P3  | 117.8(2) | Pd3 | P2  | Pd4 | 122.37(3)  |
| C18 | C13 | C14 | 118.7(3) | S2  | P2  | Pd1 | 121.05(4)  |
| C18 | C13 | P3  | 123.4(3) | S2  | P2  | Pd3 | 129.79(5)  |
| C15 | C14 | C13 | 120.5(4) | S2  | P2  | Pd4 | 59.40(3)   |
| C16 | C15 | C14 | 120.3(4) | C13 | P3  | Pd1 | 114.85(10) |
| C17 | C16 | C15 | 119.8(4) | C13 | P3  | Pd2 | 114.64(10) |
| C16 | C17 | C18 | 120.2(4) | C13 | P3  | Pd4 | 112.69(10) |
| C13 | C18 | C17 | 120.5(4) | C13 | P3  | S3  | 108.65(11) |
| C20 | C19 | C24 | 118.5(3) | Pd1 | P3  | Pd2 | 63.07(2)   |
| C20 | C19 | P4  | 117.3(3) | Pd4 | P3  | Pd1 | 71.89(2)   |
| C24 | C19 | P4  | 124.1(3) | Pd4 | P3  | Pd2 | 124.48(3)  |
| C21 | C20 | C19 | 120.6(4) | S3  | P3  | Pd1 | 117.27(4)  |
| C22 | C21 | C20 | 120.4(4) | S3  | P3  | Pd2 | 58.61(3)   |
| C23 | C22 | C21 | 119.7(4) | S3  | P3  | Pd4 | 127.36(5)  |
| C22 | C23 | C24 | 121.2(5) | C19 | P4  | Pd2 | 115.82(11) |
| C19 | C24 | C23 | 119.5(4) | C25 | P4  | C19 | 103.01(16) |
| C26 | C25 | P4  | 118.4(3) | C25 | P4  | C31 | 105.63(17) |
| C30 | C25 | C26 | 117.6(4) | C25 | P4  | Pd2 | 116.77(12) |
| C30 | C25 | P4  | 123.9(4) | C31 | P4  | C19 | 102.85(15) |
| C27 | C26 | C25 | 121.3(4) | C31 | P4  | Pd2 | 111.31(12) |
| C28 | C27 | C26 | 119.6(6) | C37 | P5  | C49 | 104.00(17) |
| C27 | C28 | C29 | 120.8(6) | C37 | P5  | Pd3 | 113.37(11) |
| C28 | C29 | C30 | 120.4(6) | C43 | P5  | C37 | 102.88(15) |
| C25 | C30 | C29 | 120.2(6) | C43 | P5  | C49 | 101.37(15) |
| C32 | C31 | C36 | 118.8(3) | C43 | P5  | Pd3 | 114.56(12) |
| C32 | C31 | P4  | 122.4(3) | C49 | P5  | Pd3 | 118.71(11) |
| C36 | C31 | P4  | 118.8(3) | C55 | P6  | C61 | 104.9(2)   |
| C33 | C32 | C31 | 120.1(4) | C55 | P6  | C67 | 103.27(18) |
| C34 | C33 | C32 | 120.3(4) | C55 | P6  | Pd4 | 111.91(14) |
| C33 | C34 | C35 | 120.7(4) | C61 | P6  | Pd4 | 114.84(13) |
| C34 | C35 | C36 | 119.7(4) | C67 | P6  | C61 | 102.03(17) |
| C35 | C36 | C31 | 120.4(4) | C67 | P6  | Pd4 | 118.31(12) |
| C38 | C37 | C42 | 117.6(3) | P1  | Pd1 | P2  | 121.54(3)  |
| C38 | C37 | P5  | 119.2(2) | P1  | Pd1 | P3  | 119.92(3)  |
| C42 | C37 | P5  | 123.2(3) | P1  | Pd1 | Pd2 | 54.45(2)   |
| C39 | C38 | C37 | 121.0(3) | P1  | Pd1 | Pd3 | 68.97(2)   |
| C38 | C39 | C40 | 120.6(4) | P1  | Pd1 | Pd4 | 161.79(3)  |
| C41 | C40 | C39 | 119.3(4) | P2  | Pd1 | Pd2 | 161.20(2)  |
| C40 | C41 | C42 | 120.4(4) | P2  | Pd1 | Pd3 | 54.60(2)   |

|     |     |     |          |     |     |     |             |
|-----|-----|-----|----------|-----|-----|-----|-------------|
| C41 | C42 | C37 | 121.1(4) | P2  | Pd1 | Pd4 | 65.42(2)    |
| C44 | C43 | C48 | 118.0(3) | P3  | Pd1 | P2  | 118.15(3)   |
| C44 | C43 | P5  | 119.2(2) | P3  | Pd1 | Pd2 | 66.91(2)    |
| C48 | C43 | P5  | 122.7(3) | P3  | Pd1 | Pd3 | 157.68(2)   |
| C43 | C44 | C45 | 120.6(4) | P3  | Pd1 | Pd4 | 53.95(2)    |
| C46 | C45 | C44 | 119.7(4) | Pd2 | Pd1 | Pd4 | 112.933(11) |
| C47 | C46 | C45 | 120.9(4) | Pd3 | Pd1 | Pd2 | 113.212(11) |
| C46 | C47 | C48 | 119.8(4) | Pd3 | Pd1 | Pd4 | 110.650(11) |
| C47 | C48 | C43 | 120.9(4) | P1  | Pd2 | P3  | 103.15(3)   |
| C50 | C49 | P5  | 122.8(3) | P1  | Pd2 | P4  | 105.09(3)   |
| C54 | C49 | C50 | 119.3(4) | P1  | Pd2 | Pd1 | 54.19(2)    |
| C54 | C49 | P5  | 117.8(3) | P1  | Pd2 | S3  | 146.81(3)   |
| C51 | C50 | C49 | 120.3(5) | P4  | Pd2 | P3  | 151.67(3)   |
| C52 | C51 | C50 | 120.1(5) | P4  | Pd2 | Pd1 | 156.17(2)   |
| C51 | C52 | C53 | 120.4(5) | P4  | Pd2 | S3  | 106.37(3)   |
| C52 | C53 | C54 | 119.8(5) | Pd1 | Pd2 | P3  | 50.022(16)  |
| C49 | C54 | C53 | 120.0(4) | S3  | Pd2 | P3  | 45.49(3)    |
| C56 | C55 | C60 | 119.1(5) | S3  | Pd2 | Pd1 | 92.76(2)    |
| C56 | C55 | P6  | 117.8(4) | P2  | Pd3 | P1  | 102.44(3)   |
| C60 | C55 | P6  | 123.0(4) | P2  | Pd3 | P5  | 112.79(3)   |
| C55 | C56 | C57 | 120.5(6) | P2  | Pd3 | Pd1 | 54.73(2)    |
| C58 | C57 | C56 | 119.3(7) | P2  | Pd3 | S1  | 146.54(3)   |
| C57 | C58 | C59 | 121.7(7) | P5  | Pd3 | P1  | 144.76(3)   |
| C58 | C59 | C60 | 120.1(7) | P5  | Pd3 | Pd1 | 163.09(3)   |
| C55 | C60 | C59 | 119.1(7) | P5  | Pd3 | S1  | 100.08(3)   |
| C62 | C61 | C66 | 117.1(4) | Pd1 | Pd3 | P1  | 49.131(17)  |
| C62 | C61 | P6  | 119.0(3) | S1  | Pd3 | P1  | 44.86(3)    |
| C66 | C61 | P6  | 124.0(3) | S1  | Pd3 | Pd1 | 91.82(2)    |
| C61 | C62 | C63 | 121.2(4) | P3  | Pd4 | P2  | 103.68(3)   |
| C64 | C63 | C62 | 121.0(5) | P3  | Pd4 | P6  | 104.64(3)   |
| C63 | C64 | C65 | 119.3(5) | P3  | Pd4 | Pd1 | 54.15(2)    |
| C64 | C65 | C66 | 119.8(5) | P3  | Pd4 | S2  | 149.20(3)   |
| C61 | C66 | C65 | 121.7(4) | P6  | Pd4 | P2  | 151.68(3)   |
| C68 | C67 | P6  | 122.5(3) | P6  | Pd4 | Pd1 | 156.96(2)   |
| C72 | C67 | C68 | 118.6(4) | P6  | Pd4 | S2  | 105.75(3)   |
| C72 | C67 | P6  | 118.8(3) | Pd1 | Pd4 | P2  | 50.461(18)  |
| C67 | C68 | C69 | 119.5(5) | S2  | Pd4 | P2  | 46.09(3)    |
| C70 | C69 | C68 | 120.6(5) | S2  | Pd4 | Pd1 | 95.05(2)    |
| C69 | C70 | C71 | 119.9(5) | P1  | S1  | Pd3 | 78.30(4)    |
| C70 | C71 | C72 | 119.4(5) | P2  | S2  | Pd4 | 74.51(3)    |

C67 C72 C71 121.8(4) P3 S3 Pd2 75.90(3)

**Table 4 Torsion Angles for 2a.**

| A  | B  | C       | D       | Angle/°     | A   | B       | C       | D       | Angle/°     |
|----|----|---------|---------|-------------|-----|---------|---------|---------|-------------|
| C1 | C2 | C3      | C4      | -1.5(7)     | C67 | C68     | C69     | C70     | 1.1(7)      |
| C1 | P1 | Pd<br>1 | P2      | 92.36(12)   | C67 | P6      | Pd<br>4 | P2      | -172.97(15) |
| C1 | P1 | Pd<br>1 | P3      | -95.01(12)  | C67 | P6      | Pd<br>4 | P3      | 6.67(15)    |
| C1 | P1 | Pd<br>1 | Pd<br>2 | -109.72(12) | C67 | P6      | Pd<br>4 | Pd<br>1 | 27.91(18)   |
| C1 | P1 | Pd<br>1 | Pd<br>3 | 107.74(12)  | C67 | P6      | Pd<br>4 | S2      | -178.37(15) |
| C1 | P1 | Pd<br>1 | Pd<br>4 | -159.96(12) | C68 | C67     | C72     | C71     | -2.6(6)     |
| C1 | P1 | Pd<br>2 | P3      | 99.76(14)   | C68 | C67     | P6      | C55     | 6.6(4)      |
| C1 | P1 | Pd<br>2 | P4      | -82.56(14)  | C68 | C67     | P6      | C61     | 115.3(3)    |
| C1 | P1 | Pd<br>2 | Pd<br>1 | 110.61(14)  | C68 | C67     | P6      | Pd<br>4 | -117.7(3)   |
| C1 | P1 | Pd<br>2 | S3      | 116.41(14)  | C68 | C69     | C70     | C71     | -2.4(8)     |
| C1 | P1 | Pd<br>3 | P2      | -93.34(13)  | C69 | C70     | C71     | C72     | 1.1(7)      |
| C1 | P1 | Pd<br>3 | P5      | 87.80(14)   | C70 | C71     | C72     | C67     | 1.4(7)      |
| C1 | P1 | Pd<br>3 | Pd<br>1 | -106.74(13) | C72 | C67     | C68     | C69     | 1.3(6)      |
| C1 | P1 | Pd<br>3 | S1      | 95.00(14)   | C72 | C67     | P6      | C55     | -173.5(3)   |
| C1 | P1 | S1      | Pd<br>3 | -110.46(12) | C72 | C67     | P6      | C61     | -64.8(3)    |
| C2 | C1 | C6      | C5      | 1.3(6)      | C72 | C67     | P6      | Pd<br>4 | 62.2(3)     |
| C2 | C1 | P1      | Pd<br>1 | -171.1(3)   | P1  | C1      | C2      | C3      | -176.4(3)   |
| C2 | C1 | P1      | Pd<br>2 | 108.3(3)    | P1  | C1      | C6      | C5      | 177.9(4)    |
| C2 | C1 | P1      | Pd<br>3 | -101.1(3)   | P1  | Pd<br>1 | Pd<br>2 | P3      | 166.16(4)   |
| C2 | C1 | P1      | S1      | -39.8(3)    | P1  | Pd      | Pd      | P4      | -33.00(7)   |



|     |     |         |         |             |    |         |         |               |
|-----|-----|---------|---------|-------------|----|---------|---------|---------------|
|     | 4   | 1       |         |             | 1  | 4       |         |               |
| C7  | P2  | Pd<br>4 | S2      | 99.89(12)   | P2 | Pd<br>3 | S1      | P1 -14.89(8)  |
| C7  | P2  | S2      | Pd<br>4 | -102.88(11) | P3 | C13     | C14 C15 | 177.0(3)      |
| C8  | C7  | C12     | C11     | 1.1(6)      | P3 | C13     | C18 C17 | -177.2(3)     |
| C8  | C7  | P2      | Pd<br>1 | 73.8(3)     | P3 | Pd<br>1 | Pd<br>2 | P1 -166.16(4) |
| C8  | C7  | P2      | Pd<br>3 | -1.7(3)     | P3 | Pd<br>1 | Pd<br>2 | P4 160.85(7)  |
| C8  | C7  | P2      | Pd<br>4 | 141.3(3)    | P3 | Pd<br>1 | Pd<br>2 | S3 17.02(3)   |
| C8  | C7  | P2      | S2      | -155.5(3)   | P3 | Pd<br>1 | Pd<br>3 | P1 -118.05(7) |
| C8  | C9  | C10     | C11     | -1.5(7)     | P3 | Pd<br>1 | Pd<br>3 | P2 78.04(7)   |
| C9  | C10 | C11     | C12     | 1.1(8)      | P3 | Pd<br>1 | Pd<br>3 | P5 32.07(11)  |
| C10 | C11 | C12     | C7      | -0.9(8)     | P3 | Pd<br>1 | Pd<br>3 | S1 -102.90(7) |
| C12 | C7  | C8      | C9      | -1.5(6)     | P3 | Pd<br>1 | Pd<br>4 | P2 167.05(4)  |
| C12 | C7  | P2      | Pd<br>1 | -101.0(3)   | P3 | Pd<br>1 | Pd<br>4 | P6 -25.61(7)  |
| C12 | C7  | P2      | Pd<br>3 | -176.4(3)   | P3 | Pd<br>1 | Pd<br>4 | S2 179.71(4)  |
| C12 | C7  | P2      | Pd<br>4 | -33.5(3)    | P3 | Pd<br>4 | S2      | P2 -13.12(8)  |
| C12 | C7  | P2      | S2      | 29.8(3)     | P4 | C19     | C20 C21 | -177.5(3)     |
| C13 | C14 | C15     | C16     | 0.4(6)      | P4 | C19     | C24 C23 | 176.4(3)      |
| C13 | P3  | Pd<br>1 | P1      | 93.28(12)   | P4 | C25     | C26 C27 | 175.3(3)      |
| C13 | P3  | Pd<br>1 | P2      | -93.85(12)  | P4 | C25     | C30 C29 | -174.3(6)     |
| C13 | P3  | Pd<br>1 | Pd<br>2 | 106.26(11)  | P4 | C31     | C32 C33 | 179.3(3)      |
| C13 | P3  | Pd<br>1 | Pd<br>3 | -158.59(11) | P4 | C31     | C36 C35 | -179.4(3)     |
| C13 | P3  | Pd<br>1 | Pd<br>4 | -107.21(11) | P4 | Pd<br>2 | S3      | P3 176.06(4)  |
| C13 | P3  | Pd<br>2 | P1      | -95.10(11)  | P5 | C37     | C38 C39 | -179.8(3)     |

|                 |         |                       |                       |               |               |           |
|-----------------|---------|-----------------------|-----------------------|---------------|---------------|-----------|
| C13 P3          | Pd<br>2 | P4                    | 89.63(13)             | P5            | C37 C42 C41   | 179.1(4)  |
| C13 P3          | Pd<br>2 | Pd<br>1               | -106.60(11)           | P5            | C43 C44 C45   | 176.0(4)  |
| C13 P3          | Pd<br>2 | S3                    | 97.60(12)             | P5            | C43 C48 C47   | -176.3(3) |
| C13 P3          | Pd<br>4 | P2                    | 99.79(11)             | P5            | C49 C50 C51   | -175.8(3) |
| C13 P3          | Pd<br>4 | P6                    | -80.04(11)            | P5            | C49 C54 C53   | 176.2(3)  |
| C13 P3          | Pd<br>4 | Pd<br>1               | 110.03(11)            | P5            | Pd<br>3 S1 P1 | 175.79(4) |
| C13 P3          | Pd<br>4 | S2                    | 109.48(12)            | P6            | C55 C56 C57   | 178.3(5)  |
| C13 P3          | S3      | Pd<br>2               | -108.03(11)           | P6            | C55 C60 C59   | -178.2(6) |
| C14 C13 C18     | C17     | -1.1(5)               | P6                    | C61 C62 C63   | -178.1(6)     |           |
| C14 C13 P3      | Pd<br>1 | 37.9(3)               | P6                    | C61 C66 C65   | 177.4(4)      |           |
| C14 C13 P3      | Pd<br>2 | 108.3(3)              | P6                    | C67 C68 C69   | -178.8(3)     |           |
| C14 C13 P3      | Pd<br>4 | -41.8(3)              | P6                    | C67 C72 C71   | 177.5(3)      |           |
| C14 C13 P3      | S3      | 171.5(2)              | P6                    | Pd<br>4 S2 P2 | 176.45(4)     |           |
| C14 C15 C16 C17 | -1.2(6) | Pd<br>1 P1 Pd<br>2 P3 | -10.85(3)             |               |               |           |
| C15 C16 C17 C18 | 0.8(7)  | Pd<br>1 P1 Pd<br>2 P4 | 166.82(3)             |               |               |           |
| C16 C17 C18 C13 | 0.3(6)  | Pd<br>1 P1 Pd<br>2 S3 | 5.80(7)               |               |               |           |
| C18 C13 C14 C15 | 0.7(5)  | Pd<br>1 P1 Pd<br>3 P2 | 13.41(3)              |               |               |           |
| C18 C13 P3      | Pd<br>1 | -145.9(3)             | Pd<br>1 P1 Pd<br>3 P5 | -165.46(4)    |               |           |
| C18 C13 P3      | Pd<br>2 | -75.6(3)              | Pd<br>1 P1 Pd<br>3 S1 | -158.25(5)    |               |           |
| C18 C13 P3      | Pd<br>4 | 134.3(3)              | Pd<br>1 P1 S1 Pd<br>3 | 21.20(4)      |               |           |
| C18 C13 P3      | S3      | -12.3(3)              | Pd<br>1 P2 Pd<br>3 P1 | -12.40(3)     |               |           |
| C19 C20 C21 C22 | 0.8(7)  | Pd P2 Pd P5           | 166.89(3)             |               |               |           |

|                 |    |    |               |    |    |    |    |            |
|-----------------|----|----|---------------|----|----|----|----|------------|
|                 |    |    |               | 1  | 3  |    |    |            |
| C19 P4          | Pd | P1 | 161.50(14)    | Pd | P2 | Pd | S1 | -1.70(7)   |
|                 | 2  |    |               | 1  |    | 3  |    |            |
| C19 P4          | Pd | P3 | -23.27(16)    | Pd | P2 | Pd | P3 | 10.78(3)   |
|                 | 2  |    |               | 1  |    | 4  |    |            |
| C19 P4          | Pd | Pd | -171.28(13)   | Pd | P2 | Pd | P6 | -169.58(6) |
|                 | 2  | 1  |               | 1  |    | 4  |    |            |
| C19 P4          | Pd | S3 | -29.19(14)    | Pd | P2 | Pd | S2 | -162.35(4) |
|                 | 2  |    |               | 1  |    | 4  |    |            |
| C20 C19 C24 C23 |    |    | 0.5(6)        | Pd | P2 | S2 | Pd | 18.56(5)   |
|                 |    |    |               | 1  |    |    | 4  |            |
| C20 C19 P4      |    |    | C25 -173.3(3) | Pd | P3 | Pd | P1 | 11.49(3)   |
|                 |    |    |               | 1  |    | 2  |    |            |
| C20 C19 P4      |    |    | C31 -63.6(3)  | Pd | P3 | Pd | P4 | -163.78(6) |
|                 |    |    |               | 1  |    | 2  |    |            |
| C20 C19 P4      | Pd |    | 58.0(3)       | Pd | P3 | Pd | S3 | -155.80(5) |
|                 | 2  |    |               | 1  |    | 2  |    |            |
| C20 C21 C22 C23 |    |    | 0.6(8)        | Pd | P3 | Pd | P2 | -10.25(3)  |
|                 |    |    |               | 1  |    | 4  |    |            |
| C21 C22 C23 C24 |    |    | -1.4(8)       | Pd | P3 | Pd | P6 | 169.93(3)  |
|                 |    |    |               | 1  |    | 4  |    |            |
| C22 C23 C24 C19 |    |    | 0.9(7)        | Pd | P3 | Pd | S2 | -0.56(7)   |
|                 |    |    |               | 1  |    | 4  |    |            |
| C24 C19 C20 C21 |    |    | -1.3(6)       | Pd | P3 | S3 | Pd | 24.28(5)   |
|                 |    |    |               | 1  |    |    | 2  |            |
| C24 C19 P4      |    |    | C25 10.8(4)   | Pd | Pd | S3 | P3 | -18.33(4)  |
|                 |    |    |               | 1  | 2  |    |    |            |
| C24 C19 P4      |    |    | C31 120.5(3)  | Pd | Pd | S1 | P1 | -16.28(4)  |
|                 |    |    |               | 1  | 3  |    |    |            |
| C24 C19 P4      | Pd |    | -117.9(3)     | Pd | Pd | S2 | P2 | -13.57(3)  |
|                 | 2  |    |               | 1  | 4  |    |    |            |
| C25 C26 C27 C28 |    |    | 1.3(7)        | Pd | P1 | Pd | P2 | -157.91(3) |
|                 |    |    |               | 2  |    | 1  |    |            |
| C25 P4          | Pd | P1 | 39.89(14)     | Pd | P1 | Pd | P3 | 14.71(4)   |
|                 | 2  |    |               | 2  |    | 1  |    |            |
| C25 P4          | Pd | P3 | -144.88(14)   | Pd | P1 | Pd | Pd | -142.54(3) |
|                 | 2  |    |               | 2  |    | 1  | 3  |            |
| C25 P4          | Pd | Pd | 67.11(16)     | Pd | P1 | Pd | Pd | -50.23(8)  |
|                 | 2  | 1  |               | 2  |    | 1  | 4  |            |
| C25 P4          | Pd | S3 | -150.81(14)   | Pd | P1 | Pd | P2 | 55.58(5)   |
|                 | 2  |    |               | 2  |    | 3  |    |            |
| C26 C25 C30 C29 |    |    | 1.6(9)        | Pd | P1 | Pd | P5 | -123.28(5) |
|                 |    |    |               |    |    |    |    |            |



|                 |          |           |            |    |    |    |    |            |          |
|-----------------|----------|-----------|------------|----|----|----|----|------------|----------|
| C26 C25 P4      | C19      | -84.1(3)  | 2          | 3  | Pd | Pd | Pd | Pd         | 42.17(3) |
|                 |          |           | 2          |    | P1 | P3 | P1 |            |          |
| C26 C25 P4      | C31      | 168.3(3)  | Pd         | Pd | P1 | Pd | S1 | -116.08(6) |          |
|                 |          |           | 2          | 3  |    |    |    |            |          |
| C26 C25 P4      | Pd       | 44.0(3)   | Pd         | Pd | P1 | S1 | Pd | 106.12(5)  |          |
|                 | 2        |           | 2          | 3  |    |    | 3  |            |          |
| C26 C27 C28 C29 | -2.6(10) |           | Pd         | Pd | P3 | P1 | P1 | -12.98(4)  |          |
|                 |          |           | 2          | 1  |    |    |    |            |          |
| C27 C28 C29 C30 | 3.5(13)  |           | Pd         | Pd | P3 | P1 | P2 | 159.89(3)  |          |
|                 |          |           | 2          | 1  |    |    |    |            |          |
| C28 C29 C30 C25 | -3.0(12) |           | Pd         | Pd | P3 | P1 | Pd | 95.15(6)   |          |
|                 |          |           | 2          | 3  |    |    | 3  |            |          |
| C30 C25 C26 C27 | -0.8(7)  |           | Pd         | Pd | P3 | P1 | Pd | 146.53(3)  |          |
|                 |          |           | 2          | 4  |    |    | 4  |            |          |
| C30 C25 P4      | C19      | 91.8(5)   | Pd         | Pd | P3 | P4 | P2 | -46.86(4)  |          |
|                 |          |           | 2          | 4  |    |    |    |            |          |
| C30 C25 P4      | C31      | -15.8(5)  | Pd         | Pd | P3 | P4 | P6 | 133.31(4)  |          |
|                 |          |           | 2          | 4  |    |    |    |            |          |
| C30 C25 P4      | Pd       | -140.1(4) | Pd         | Pd | P3 | P4 | Pd | -36.62(3)  |          |
|                 | 2        |           | 2          | 1  |    |    | 1  |            |          |
| C31 C32 C33 C34 | -0.8(6)  |           | Pd         | Pd | P3 | P4 | S2 | -37.17(8)  |          |
|                 |          |           | 2          | 4  |    |    |    |            |          |
| C31 P4          | Pd       | P1        | -81.49(12) | Pd | Pd | Pd | P1 | -32.58(3)  |          |
|                 | 2        |           |            | 2  | 1  | 3  |    |            |          |
| C31 P4          | Pd       | P3        | 93.74(13)  | Pd | Pd | Pd | P2 | 163.52(3)  |          |
|                 | 2        |           |            | 2  | 1  | 3  |    |            |          |
| C31 P4          | Pd       | Pd        | -54.27(14) | Pd | Pd | Pd | P5 | 117.54(8)  |          |
|                 | 2        | 1         |            | 2  | 1  | 3  |    |            |          |
| C31 P4          | Pd       | S3        | 87.82(12)  | Pd | Pd | Pd | S1 | -17.42(3)  |          |
|                 | 2        |           |            | 2  | 1  | 3  |    |            |          |
| C32 C31 C36 C35 | -1.0(6)  |           | Pd         | Pd | Pd | Pd | P2 | -159.52(3) |          |
|                 |          |           | 2          | 1  | 4  |    |    |            |          |
| C32 C31 P4      | C19      | -33.1(3)  | Pd         | Pd | Pd | Pd | P3 | 33.43(3)   |          |
|                 |          |           | 2          | 1  | 4  |    |    |            |          |
| C32 C31 P4      | C25      | 74.6(3)   | Pd         | Pd | Pd | Pd | P6 | 7.82(7)    |          |
|                 |          |           | 2          | 1  | 4  |    |    |            |          |
| C32 C31 P4      | Pd       | -157.8(3) | Pd         | Pd | Pd | Pd | S2 | -146.86(2) |          |
|                 | 2        |           | 2          | 1  | 4  |    |    |            |          |
| C32 C33 C34 C35 | 0.6(7)   |           | Pd         | Pd | P1 | Pd | P2 | -15.38(4)  |          |
|                 |          |           | 3          | 1  |    | 1  |    |            |          |
| C33 C34 C35 C36 | -0.6(6)  |           | Pd         | Pd | P1 | Pd | P3 | 157.25(3)  |          |
|                 |          |           |            |    |    |    |    |            |          |

|                 |                   |    |    |    |    |    |    |            |
|-----------------|-------------------|----|----|----|----|----|----|------------|
| C34 C35 C36 C31 | 0.8(6)            | 3  | 1  | Pd | Pd | Pd | Pd | 142.54(3)  |
|                 |                   | 3  |    | P1 | 1  | 2  |    |            |
| C36 C31 C32 C33 | 1.0(6)            | Pd | Pd | Pd | Pd |    |    | 92.30(7)   |
|                 |                   | 3  |    | P1 | 1  | 4  |    |            |
| C36 C31 P4      | C19 145.2(3)      | Pd | Pd | Pd | Pd |    |    | -49.54(4)  |
|                 |                   | 3  |    | P1 | 2  | P3 |    |            |
| C36 C31 P4      | C25 -107.1(3)     | Pd | Pd | Pd | Pd |    |    | 128.14(4)  |
|                 |                   | 3  |    | P1 | 2  | P4 |    |            |
| C36 C31 P4      | Pd 20.6(3)        | Pd | Pd | Pd | Pd |    |    | -38.69(2)  |
|                 |                   | 3  |    | P1 | 2  | 1  |    |            |
| C37 C38 C39 C40 | -0.2(6)           | Pd | Pd | Pd | Pd |    |    | -32.88(8)  |
|                 |                   | 3  |    | P1 | 2  | S3 |    |            |
| C37 P5          | Pd 32.35(14)      | Pd | Pd | Pd | Pd |    |    | 17.68(4)   |
|                 |                   | 3  |    | P1 | 2  | 1  |    |            |
| C37 P5          | Pd 3 -146.45(13)  | Pd | Pd | Pd | Pd |    |    | -155.07(3) |
|                 |                   | 3  |    | P2 | 1  | P3 |    |            |
| C37 P5          | Pd Pd -106.90(14) | Pd | Pd | Pd | Pd |    |    | -54.02(8)  |
|                 |                   | 3  |    | P2 | 1  | 2  |    |            |
| C37 P5          | Pd 3 S1 27.19(13) | Pd | Pd | Pd | Pd |    |    | -143.21(3) |
|                 |                   | 3  |    | P2 | 1  | 4  |    |            |
| C38 C37 C42 C41 | -0.9(7)           | Pd | Pd | Pd | Pd |    |    | 52.77(5)   |
|                 |                   | 3  |    | P2 | 4  | P3 |    |            |
| C38 C37 P5      | C43 165.2(3)      | Pd | Pd | Pd | Pd |    |    | -127.59(6) |
|                 |                   | 3  |    | P2 | 4  | P6 |    |            |
| C38 C37 P5      | C49 -89.5(3)      | Pd | Pd | Pd | Pd |    |    | 41.99(3)   |
|                 |                   | 3  |    | P2 | 4  | 1  |    |            |
| C38 C37 P5      | Pd 3 40.9(3)      | Pd | Pd | Pd | Pd |    |    | -120.36(6) |
|                 |                   | 3  |    | P2 | 4  | S2 |    |            |
| C38 C39 C40 C41 | 1.0(7)            | Pd | Pd | Pd | Pd |    |    | 108.48(5)  |
|                 |                   | 3  |    | P2 | S2 | 4  |    |            |
| C39 C40 C41 C42 | -1.7(9)           | Pd | Pd | Pd | Pd |    |    | 38.15(3)   |
|                 |                   | 3  |    | 1  | 2  | P1 |    |            |
| C40 C41 C42 C37 | 1.7(9)            | Pd | Pd | Pd | Pd |    |    | -155.69(3) |
|                 |                   | 3  |    | 1  | 2  | P3 |    |            |
| C42 C37 C38 C39 | 0.1(6)            | Pd | Pd | Pd | Pd |    |    | 5.15(7)    |
|                 |                   | 3  |    | 1  | 2  | P4 |    |            |
| C42 C37 P5      | C43 -14.8(4)      | Pd | Pd | Pd | Pd |    |    | -138.67(3) |
|                 |                   | 3  |    | 1  | 2  | S3 |    |            |
| C42 C37 P5      | C49 90.6(4)       | Pd | Pd | Pd | Pd |    |    | -31.44(2)  |
|                 |                   | 3  |    | 1  | 4  | P2 |    |            |
| C42 C37 P5      | Pd -139.1(3)      | Pd | Pd | Pd | Pd |    |    | 161.51(3)  |
|                 |                   | 3  |    | Pd | Pd | P3 |    |            |

|                 |         |           |            |  |    |    |    |    |            |
|-----------------|---------|-----------|------------|--|----|----|----|----|------------|
|                 | 3       |           |            |  | 3  | 1  | 4  |    |            |
| C43 C44 C45 C46 | 1.0(8)  |           |            |  | Pd | Pd | Pd | P6 | 135.90(7)  |
|                 |         |           |            |  | 3  | 1  | 4  |    |            |
| C43 P5          | Pd      | P1        | -85.33(13) |  | Pd | Pd | Pd | S2 | -18.78(3)  |
|                 | 3       |           |            |  | 3  | 1  | 4  |    |            |
| C43 P5          | Pd      | P2        | 95.87(13)  |  | Pd | P2 | Pd | P1 | 160.89(3)  |
|                 | 3       |           |            |  | 4  |    | 1  |    |            |
| C43 P5          | Pd      | Pd        | 135.43(13) |  | Pd | P2 | Pd | P3 | -11.86(3)  |
|                 | 3       | 1         |            |  | 4  |    | 1  |    |            |
| C43 P5          | Pd      | S1        | -90.49(12) |  | Pd | P2 | Pd | Pd | 89.19(7)   |
|                 | 3       |           |            |  | 4  |    | 1  | 2  |            |
| C44 C43 C48 C47 | 0.9(6)  |           |            |  | Pd | P2 | Pd | Pd | 143.21(3)  |
|                 |         |           |            |  | 4  |    | 1  | 3  |            |
| C44 C43 P5      | C37     | -92.1(3)  |            |  | Pd | P2 | Pd | P1 | -52.04(5)  |
|                 |         |           |            |  | 4  |    | 3  |    |            |
| C44 C43 P5      | C49     | 160.5(3)  |            |  | Pd | P2 | Pd | P5 | 127.25(4)  |
|                 |         |           |            |  | 4  |    | 3  |    |            |
| C44 C43 P5      | Pd      | 31.4(3)   |            |  | Pd | P2 | Pd | Pd | -39.64(3)  |
|                 | 3       |           |            |  | 4  |    | 3  | 1  |            |
| C44 C45 C46 C47 | -0.3(8) |           |            |  | Pd | P2 | Pd | S1 | -41.34(8)  |
|                 |         |           |            |  | 4  |    | 3  |    |            |
| C45 C46 C47 C48 | 0.0(7)  |           |            |  | Pd | P3 | Pd | P1 | -159.51(3) |
|                 |         |           |            |  | 4  |    | 1  |    |            |
| C46 C47 C48 C43 | -0.3(6) |           |            |  | Pd | P3 | Pd | P2 | 13.36(4)   |
|                 |         |           |            |  | 4  |    | 1  |    |            |
| C48 C43 C44 C45 | -1.3(6) |           |            |  | Pd | P3 | Pd | Pd | -146.53(3) |
|                 |         |           |            |  | 4  |    | 1  | 2  |            |
| C48 C43 P5      | C37     | 85.0(3)   |            |  | Pd | P3 | Pd | Pd | -51.38(7)  |
|                 |         |           |            |  | 4  |    | 1  | 3  |            |
| C48 C43 P5      | C49     | -22.4(3)  |            |  | Pd | P3 | Pd | P1 | 50.98(5)   |
|                 |         |           |            |  | 4  |    | 2  |    |            |
| C48 C43 P5      | Pd      | -151.5(3) |            |  | Pd | P3 | Pd | P4 | -124.29(6) |
|                 | 3       |           |            |  | 4  |    | 2  |    |            |
| C49 C50 C51 C52 | -0.9(7) |           |            |  | Pd | P3 | Pd | Pd | 39.49(3)   |
|                 |         |           |            |  | 4  |    | 2  | 1  |            |
| C49 P5          | Pd      | P1        | 154.83(13) |  | Pd | P3 | Pd | S3 | -116.31(6) |
|                 | 3       |           |            |  | 4  |    | 2  |    |            |
| C49 P5          | Pd      | P2        | -23.96(14) |  | Pd | P3 | S3 | Pd | 111.62(5)  |
|                 | 3       |           |            |  | 4  |    |    | 2  |            |
| C49 P5          | Pd      | Pd        | 15.59(18)  |  | Pd | Pd | Pd | P1 | 164.88(3)  |
|                 | 3       | 1         |            |  | 4  | 1  | 2  |    |            |
| C49 P5          | Pd      | S1        | 149.68(14) |  | Pd | Pd | Pd | P3 | -28.96(2)  |
|                 |         |           |            |  |    |    |    |    |            |

|                                |    |    |    |    |            |  |
|--------------------------------|----|----|----|----|------------|--|
| 3                              | 4  | 1  | 2  |    |            |  |
| C50 C49 C54 C53 -1.1(5)        | Pd | Pd | Pd | P4 | 131.89(6)  |  |
|                                | 4  | 1  | 2  |    |            |  |
| C50 C49 P5 C37 -4.4(3)         | Pd | Pd | Pd | S3 | -11.94(3)  |  |
|                                | 4  | 1  | 2  |    |            |  |
| C50 C49 P5 C43 102.1(3)        | Pd | Pd | Pd | P1 | -160.51(3) |  |
|                                | 4  | 1  | 3  |    |            |  |
| C50 C49 P5 Pd<br>3 -131.5(3)   | Pd | Pd | Pd | P2 | 35.59(3)   |  |
|                                | 4  | 1  | 3  |    |            |  |
| C50 C51 C52 C53 0.1(8)         | Pd | Pd | Pd | P5 | -10.39(9)  |  |
|                                | 4  | 1  | 3  |    |            |  |
| C51 C52 C53 C54 0.2(8)         | Pd | Pd | Pd | S1 | -145.35(3) |  |
|                                | 4  | 1  | 3  |    |            |  |
| C52 C53 C54 C49 0.3(7)         | S1 | P1 | Pd | P2 | -35.45(6)  |  |
|                                |    |    | 1  |    |            |  |
| C54 C49 C50 C51 1.4(6)         | S1 | P1 | Pd | P3 | 137.18(5)  |  |
|                                |    |    | 1  |    |            |  |
| C54 C49 P5 C37 178.4(3)        | S1 | P1 | Pd | Pd | 122.46(6)  |  |
|                                |    |    | 1  | 2  |            |  |
| C54 C49 P5 C43 -75.1(3)        | S1 | P1 | Pd | Pd | -20.07(4)  |  |
|                                |    |    | 1  | 3  |            |  |
| C54 C49 P5 Pd<br>3 51.4(3)     | S1 | P1 | Pd | Pd | 72.23(9)   |  |
|                                |    |    | 1  | 4  |            |  |
| C55 C56 C57 C58 0.9(12)        | S1 | P1 | Pd | P3 | -119.05(6) |  |
|                                |    |    | 2  |    |            |  |
| C55 P6 Pd<br>4 P2 67.19(17)    | S1 | P1 | Pd | P4 | 58.62(6)   |  |
|                                |    |    | 2  |    |            |  |
| C55 P6 Pd<br>4 P3 -113.17(16)  | S1 | P1 | Pd | Pd | -108.20(6) |  |
|                                |    |    | 2  | 1  |            |  |
| C55 P6 Pd Pd<br>4 1 -91.94(17) | S1 | P1 | Pd | S3 | -102.40(7) |  |
|                                |    |    | 2  |    |            |  |
| C55 P6 Pd<br>4 S2 61.78(16)    | S1 | P1 | Pd | P2 | 171.66(4)  |  |
|                                |    |    | 3  |    |            |  |
| C56 C55 C60 C59 -1.8(10)       | S1 | P1 | Pd | P5 | -7.20(7)   |  |
|                                |    |    | 3  |    |            |  |
| C56 C55 P6 C61 162.0(4)        | S1 | P1 | Pd | Pd | 158.25(5)  |  |
|                                |    |    | 3  | 1  |            |  |
| C56 C55 P6 C67 -91.5(4)        | S2 | P2 | Pd | P1 | 143.16(5)  |  |
|                                |    |    | 1  |    |            |  |
| C56 C55 P6 Pd<br>4 36.8(4)     | S2 | P2 | Pd | P3 | -29.59(7)  |  |
|                                |    |    | 1  |    |            |  |
| C56 C57 C58 C59 -3.7(15)       | S2 | P2 | Pd | Pd | 71.46(9)   |  |
|                                |    |    |    |    |            |  |

|                 |            |    |    |    |    |    |    |            |
|-----------------|------------|----|----|----|----|----|----|------------|
| C57 C58 C59 C60 | 3.7(17)    | S2 | P2 | 1  | 2  | Pd | Pd | 125.48(6)  |
|                 |            |    |    | 1  | 3  |    |    |            |
| C58 C59 C60 C55 | -0.8(14)   | S2 | P2 | 1  | 4  | Pd | Pd | -17.73(4)  |
|                 |            |    |    | 1  | 4  |    |    |            |
| C60 C55 C56 C57 | 1.8(9)     | S2 | P2 | 3  | P1 | Pd |    | -127.18(5) |
|                 |            |    |    | 3  |    |    |    |            |
| C60 C55 P6 C61  | -21.6(5)   | S2 | P2 | 3  | P5 | Pd |    | 52.11(6)   |
|                 |            |    |    | 3  |    |    |    |            |
| C60 C55 P6 C67  | 84.9(5)    | S2 | P2 | 3  | Pd | Pd |    | -114.78(6) |
|                 |            |    |    | 3  | 1  |    |    |            |
| C60 C55 P6 Pd   | -146.8(4)  | S2 | P2 | 3  | S1 | Pd |    | -116.49(7) |
|                 |            |    |    | 3  |    |    |    |            |
| C61 C62 C63 C64 | -0.1(12)   | S2 | P2 | 4  | P3 | Pd |    | 173.13(4)  |
|                 |            |    |    | 4  |    |    |    |            |
| C61 P6 Pd       | -52.29(17) | S2 | P2 | 4  | P6 | Pd |    | -7.23(8)   |
|                 |            |    |    | 4  |    |    |    |            |
| C61 P6 Pd       | 127.35(15) | S2 | P2 | 4  | Pd | Pd |    | 162.35(4)  |
|                 |            |    |    | 4  | 1  |    |    |            |
| C61 P6 Pd       | 148.59(15) | S3 | P3 | 1  | Pd | Pd |    | -36.17(7)  |
|                 |            |    |    | 1  | 1  |    |    |            |
| C61 P6 Pd       | -57.69(15) | S3 | P3 | 1  | Pd | Pd |    | 136.71(5)  |
|                 |            |    |    | 1  | 2  |    |    |            |
| C62 C61 C66 C65 | -0.7(8)    | S3 | P3 | 1  | Pd | Pd |    | -23.19(5)  |
|                 |            |    |    | 1  | 2  |    |    |            |
| C62 C61 P6 C55  | -95.9(5)   | S3 | P3 | 1  | Pd | Pd |    | 71.97(8)   |
|                 |            |    |    | 1  | 3  |    |    |            |
| C62 C61 P6 C67  | 156.6(4)   | S3 | P3 | 1  | Pd | Pd |    | 123.34(6)  |
|                 |            |    |    | 1  | 4  |    |    |            |
| C62 C61 P6 Pd   | 27.4(5)    | S3 | P3 | 2  | Pd | Pd |    | 167.29(4)  |
|                 |            |    |    | 2  | 1  |    |    |            |
| C62 C63 C64 C65 | 0.6(12)    | S3 | P3 | 2  | Pd | Pd |    | -7.98(8)   |
|                 |            |    |    | 2  | 4  |    |    |            |
| C63 C64 C65 C66 | -1.1(11)   | S3 | P3 | 2  | Pd | Pd |    | 155.80(5)  |
|                 |            |    |    | 2  | 1  |    |    |            |
| C64 C65 C66 C61 | 1.2(9)     | S3 | P3 | 4  | Pd | Pd |    | -121.16(5) |
|                 |            |    |    | 4  | 2  |    |    |            |
| C66 C61 C62 C63 | 0.2(9)     | S3 | P3 | 4  | Pd | Pd |    | 59.02(6)   |
|                 |            |    |    | 4  | 6  |    |    |            |
| C66 C61 P6 C55  | 86.0(4)    | S3 | P3 | 4  | Pd | Pd |    | -110.91(6) |
|                 |            |    |    | 4  | 1  |    |    |            |
| C66 C61 P6 C67  | -21.5(5)   | S3 | P3 | Pd | S2 | Pd |    | -111.47(7) |
|                 |            |    |    |    |    |    |    |            |

C66 C61 P6 Pd  
4 -150.7(4)

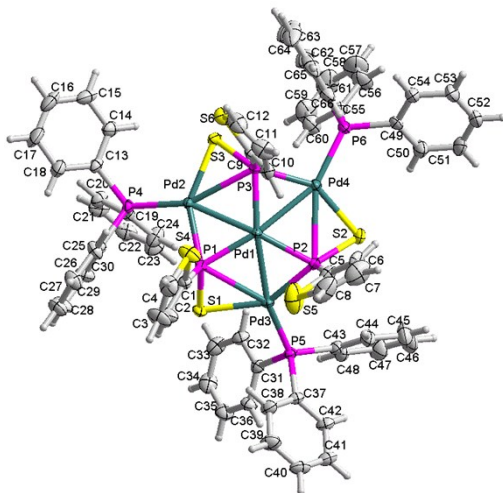

## 2c

**Table 1 Crystal data and structure refinement for 2c.**

|                                                |                                                              |
|------------------------------------------------|--------------------------------------------------------------|
| Empirical formula                              | $C_{66}H_{54}P_6Pd_4S_6$                                     |
| Formula weight                                 | 1650.87                                                      |
| Temperature/K                                  | 293(2)                                                       |
| Crystal system                                 | monoclinic                                                   |
| Space group                                    | $P2_1/n$                                                     |
| a/Å                                            | 15.6070(3)                                                   |
| b/Å                                            | 27.8868(3)                                                   |
| c/Å                                            | 17.6155(3)                                                   |
| $\alpha/^\circ$                                | 90                                                           |
| $\beta/^\circ$                                 | 112.931(2)                                                   |
| $\gamma/^\circ$                                | 90                                                           |
| Volume/Å <sup>3</sup>                          | 7060.9(2)                                                    |
| Z                                              | 4                                                            |
| $\rho_{\text{calc}}/\text{cm}^3$               | 1.553                                                        |
| $\mu/\text{mm}^{-1}$                           | 1.353                                                        |
| F(000)                                         | 3280.0                                                       |
| Crystal size/mm <sup>3</sup>                   | 0.21 × 0.17 × 0.16                                           |
| Radiation                                      | MoK $\alpha$ ( $\lambda = 0.71073$ )                         |
| 2 $\theta$ range for data collection/ $^\circ$ | 6.818 to 52.742                                              |
| Index ranges                                   | $-19 \leq h \leq 19, -34 \leq k \leq 34, -22 \leq l \leq 20$ |

|                                                |                                                                   |
|------------------------------------------------|-------------------------------------------------------------------|
| Reflections collected                          | 37057                                                             |
| Independent reflections                        | 14396 [ $R_{\text{int}} = 0.0324$ , $R_{\text{sigma}} = 0.0425$ ] |
| Data/restraints/parameters                     | 14396/35/760                                                      |
| Goodness-of-fit on $F^2$                       | 1.044                                                             |
| Final R indexes [ $I \geq 2\sigma(I)$ ]        | $R_1 = 0.0388$ , $wR_2 = 0.0935$                                  |
| Final R indexes [all data]                     | $R_1 = 0.0522$ , $wR_2 = 0.1000$                                  |
| Largest diff. peak/hole / $e \text{ \AA}^{-3}$ | 1.28/-0.85                                                        |

**Table 2 Bond Lengths for 2c.**

| Atom | Atom | Length/ $\text{\AA}$ | Atom | Atom | Length/ $\text{\AA}$ |
|------|------|----------------------|------|------|----------------------|
| C1   | C2   | 1.390(10)            | C35  | C36  | 1.391(6)             |
| C1   | C2A  | 1.394(17)            | C37  | C38  | 1.379(6)             |
| C1   | P1   | 1.793(4)             | C37  | C42  | 1.393(5)             |
| C1   | S4   | 1.702(4)             | C37  | P5   | 1.833(4)             |
| C1   | S4A  | 1.636(10)            | C38  | C39  | 1.386(6)             |
| C2   | C3   | 1.365(10)            | C39  | C40  | 1.381(7)             |
| C2A  | C4   | 1.420(17)            | C40  | C41  | 1.365(7)             |
| C3   | C4   | 1.315(7)             | C41  | C42  | 1.386(6)             |
| C3   | S4A  | 1.669(10)            | C43  | C44  | 1.393(6)             |
| C4   | S4   | 1.653(6)             | C43  | C48  | 1.385(6)             |
| C5   | C6   | 1.418(10)            | C43  | P5   | 1.816(4)             |
| C5   | C6A  | 1.437(11)            | C44  | C45  | 1.389(7)             |
| C5   | P2   | 1.815(4)             | C45  | C46  | 1.372(9)             |
| C5   | S5   | 1.715(7)             | C46  | C47  | 1.368(9)             |
| C5   | S5A  | 1.724(7)             | C47  | C48  | 1.397(7)             |
| C6   | C7   | 1.309(9)             | C49  | C50  | 1.387(6)             |
| C6A  | C8   | 1.324(10)            | C49  | C54  | 1.376(6)             |
| C7   | C8   | 1.276(9)             | C49  | P6   | 1.837(4)             |
| C7   | S5A  | 1.742(9)             | C50  | C51  | 1.380(6)             |
| C8   | S5   | 1.789(9)             | C51  | C52  | 1.350(7)             |
| C9   | C10  | 1.459(18)            | C52  | C53  | 1.372(7)             |
| C9   | C10A | 1.424(11)            | C53  | C54  | 1.397(6)             |
| C9   | P3   | 1.806(4)             | C55  | C56  | 1.378(6)             |
| C9   | S6   | 1.702(7)             | C55  | C60  | 1.374(6)             |
| C9   | S6A  | 1.740(5)             | C55  | P6   | 1.828(5)             |
| C10  | C11  | 1.390(15)            | C56  | C57  | 1.401(8)             |
| C10A | C12  | 1.326(11)            | C57  | C58  | 1.351(10)            |
| C11  | C12  | 1.339(8)             | C58  | C59  | 1.348(9)             |
| C11  | S6A  | 1.690(7)             | C59  | C60  | 1.398(7)             |

|     |     |          |     |     |            |
|-----|-----|----------|-----|-----|------------|
| C12 | S6  | 1.689(7) | C61 | C62 | 1.380(8)   |
| C13 | C14 | 1.387(6) | C61 | C66 | 1.379(7)   |
| C13 | C18 | 1.394(6) | C61 | P6  | 1.828(5)   |
| C13 | P4  | 1.833(4) | C62 | C63 | 1.419(9)   |
| C14 | C15 | 1.393(6) | C63 | C64 | 1.348(10)  |
| C15 | C16 | 1.371(8) | C64 | C65 | 1.367(10)  |
| C16 | C17 | 1.355(9) | C65 | C66 | 1.393(7)   |
| C17 | C18 | 1.370(7) | P1  | Pd1 | 2.2622(9)  |
| C19 | C20 | 1.392(5) | P1  | Pd2 | 2.2752(10) |
| C19 | C24 | 1.376(6) | P1  | Pd3 | 2.7875(10) |
| C19 | P4  | 1.829(4) | P1  | S1  | 2.0141(14) |
| C20 | C21 | 1.385(6) | P2  | Pd1 | 2.2804(9)  |
| C21 | C22 | 1.357(7) | P2  | Pd3 | 2.2927(10) |
| C22 | C23 | 1.366(7) | P2  | Pd4 | 2.7467(10) |
| C23 | C24 | 1.375(6) | P2  | S2  | 2.0220(14) |
| C25 | C26 | 1.382(6) | P3  | Pd1 | 2.2707(9)  |
| C25 | C30 | 1.383(6) | P3  | Pd2 | 2.7322(9)  |
| C25 | P4  | 1.827(4) | P3  | Pd4 | 2.2830(9)  |
| C26 | C27 | 1.393(6) | P3  | S3  | 2.0213(13) |
| C27 | C28 | 1.358(7) | P4  | Pd2 | 2.2911(9)  |
| C28 | C29 | 1.361(7) | P5  | Pd3 | 2.3006(10) |
| C29 | C30 | 1.391(6) | P6  | Pd4 | 2.2928(10) |
| C31 | C32 | 1.389(6) | Pd1 | Pd2 | 2.6668(4)  |
| C31 | C36 | 1.386(5) | Pd1 | Pd3 | 2.6536(4)  |
| C31 | P5  | 1.832(4) | Pd1 | Pd4 | 2.6669(4)  |
| C32 | C33 | 1.375(6) | Pd2 | S3  | 2.4211(10) |
| C33 | C34 | 1.363(7) | Pd3 | S1  | 2.4100(10) |
| C34 | C35 | 1.377(7) | Pd4 | S2  | 2.4152(11) |





**Table 3 Bond Angles for 2c.**

| Atom | Atom | Atom | Angle/°   | Atom | Atom | Atom | Angle/°    |
|------|------|------|-----------|------|------|------|------------|
| C2   | C1   | P1   | 133.0(5)  | C63  | C64  | C65  | 122.9(7)   |
| C2   | C1   | S4   | 107.0(5)  | C64  | C65  | C66  | 118.2(7)   |
| C2A  | C1   | P1   | 132.1(9)  | C61  | C66  | C65  | 121.0(6)   |
| C2A  | C1   | S4A  | 108.3(10) | C1   | P1   | Pd1  | 112.12(13) |
| S4   | C1   | P1   | 119.9(2)  | C1   | P1   | Pd2  | 115.38(13) |
| S4A  | C1   | P1   | 119.6(4)  | C1   | P1   | Pd3  | 112.89(13) |
| C3   | C2   | C1   | 115.4(8)  | C1   | P1   | S1   | 107.78(14) |
| C1   | C2A  | C4   | 118.6(16) | Pd1  | P1   | Pd2  | 71.99(3)   |
| C4   | C3   | C2   | 110.2(6)  | Pd1  | P1   | Pd3  | 62.38(2)   |
| C4   | C3   | S4A  | 121.2(5)  | Pd2  | P1   | Pd3  | 122.64(4)  |
| C3   | C4   | C2A  | 100.2(10) | S1   | P1   | Pd1  | 116.72(5)  |
| C3   | C4   | S4   | 114.8(4)  | S1   | P1   | Pd2  | 128.10(6)  |
| C6   | C5   | P2   | 135.7(5)  | S1   | P1   | Pd3  | 57.59(4)   |
| C6   | C5   | S5   | 108.3(5)  | C5   | P2   | Pd1  | 105.17(14) |
| C6A  | C5   | P2   | 133.1(5)  | C5   | P2   | Pd3  | 115.17(16) |
| C6A  | C5   | S5A  | 107.5(5)  | C5   | P2   | Pd4  | 106.64(15) |
| S5   | C5   | P2   | 114.8(3)  | C5   | P2   | S2   | 106.82(16) |
| S5A  | C5   | P2   | 117.8(3)  | Pd1  | P2   | Pd3  | 70.94(3)   |
| C7   | C6   | C5   | 119.4(9)  | Pd1  | P2   | Pd4  | 63.28(2)   |
| C8   | C6A  | C5   | 118.6(9)  | Pd3  | P2   | Pd4  | 124.05(4)  |
| C8   | C7   | C6   | 105.9(8)  | S2   | P2   | Pd1  | 119.11(5)  |
| C8   | C7   | S5A  | 122.0(6)  | S2   | P2   | Pd3  | 132.31(6)  |
| C7   | C8   | C6A  | 105.2(8)  | S2   | P2   | Pd4  | 58.53(4)   |
| C7   | C8   | S5   | 119.5(6)  | C9   | P3   | Pd1  | 112.03(13) |
| C10  | C9   | P3   | 129.6(6)  | C9   | P3   | Pd2  | 110.78(12) |
| C10  | C9   | S6   | 109.5(7)  | C9   | P3   | Pd4  | 113.45(13) |
| C10A | C9   | P3   | 137.0(5)  | C9   | P3   | S3   | 107.49(14) |
| C10A | C9   | S6A  | 106.9(5)  | Pd1  | P3   | Pd2  | 63.64(2)   |
| S6   | C9   | P3   | 120.8(3)  | Pd1  | P3   | Pd4  | 71.70(3)   |
| S6A  | C9   | P3   | 116.1(2)  | Pd4  | P3   | Pd2  | 125.78(4)  |
| C11  | C10  | C9   | 114.8(12) | S3   | P3   | Pd1  | 118.39(5)  |
| C12  | C10A | C9   | 118.2(9)  | S3   | P3   | Pd2  | 59.00(4)   |

|      |     |     |          |     |     |     |             |
|------|-----|-----|----------|-----|-----|-----|-------------|
| C12  | C11 | C10 | 104.6(9) | S3  | P3  | Pd4 | 129.34(6)   |
| C12  | C11 | S6A | 118.4(4) | C13 | P4  | Pd2 | 118.21(13)  |
| C10A | C12 | C11 | 107.3(7) | C19 | P4  | C13 | 103.69(18)  |
| C11  | C12 | S6  | 121.4(5) | C19 | P4  | Pd2 | 113.33(13)  |
| C14  | C13 | C18 | 118.1(4) | C25 | P4  | C13 | 103.32(19)  |
| C14  | C13 | P4  | 118.2(3) | C25 | P4  | C19 | 102.70(18)  |
| C18  | C13 | P4  | 123.7(4) | C25 | P4  | Pd2 | 113.83(12)  |
| C13  | C14 | C15 | 120.7(5) | C31 | P5  | C37 | 103.13(18)  |
| C16  | C15 | C14 | 118.6(6) | C31 | P5  | Pd3 | 112.15(12)  |
| C17  | C16 | C15 | 121.9(5) | C37 | P5  | Pd3 | 115.58(13)  |
| C16  | C17 | C18 | 119.5(6) | C43 | P5  | C31 | 103.62(18)  |
| C17  | C18 | C13 | 121.2(6) | C43 | P5  | C37 | 103.03(19)  |
| C20  | C19 | P4  | 122.4(3) | C43 | P5  | Pd3 | 117.61(13)  |
| C24  | C19 | C20 | 118.7(4) | C49 | P6  | Pd4 | 118.61(13)  |
| C24  | C19 | P4  | 118.8(3) | C55 | P6  | C49 | 102.37(19)  |
| C21  | C20 | C19 | 119.3(4) | C55 | P6  | Pd4 | 114.50(15)  |
| C22  | C21 | C20 | 121.2(4) | C61 | P6  | C49 | 103.04(19)  |
| C21  | C22 | C23 | 119.6(4) | C61 | P6  | C55 | 104.5(2)    |
| C22  | C23 | C24 | 120.4(5) | C61 | P6  | Pd4 | 112.14(15)  |
| C23  | C24 | C19 | 120.8(4) | P1  | Pd1 | P2  | 121.11(4)   |
| C26  | C25 | C30 | 117.9(4) | P1  | Pd1 | P3  | 118.84(3)   |
| C26  | C25 | P4  | 123.4(3) | P1  | Pd1 | Pd2 | 54.23(3)    |
| C30  | C25 | P4  | 118.6(3) | P1  | Pd1 | Pd3 | 68.56(3)    |
| C25  | C26 | C27 | 120.6(4) | P1  | Pd1 | Pd4 | 164.57(3)   |
| C28  | C27 | C26 | 120.7(5) | P2  | Pd1 | Pd2 | 162.80(3)   |
| C27  | C28 | C29 | 119.6(5) | P2  | Pd1 | Pd3 | 54.75(3)    |
| C28  | C29 | C30 | 120.5(5) | P2  | Pd1 | Pd4 | 66.92(3)    |
| C25  | C30 | C29 | 120.7(4) | P3  | Pd1 | P2  | 120.00(3)   |
| C32  | C31 | P5  | 119.0(3) | P3  | Pd1 | Pd2 | 66.64(2)    |
| C36  | C31 | C32 | 118.3(4) | P3  | Pd1 | Pd3 | 161.64(3)   |
| C36  | C31 | P5  | 122.7(3) | P3  | Pd1 | Pd4 | 54.36(2)    |
| C33  | C32 | C31 | 121.3(4) | Pd2 | Pd1 | Pd4 | 113.831(13) |
| C34  | C33 | C32 | 120.1(5) | Pd3 | Pd1 | Pd2 | 113.463(13) |
| C33  | C34 | C35 | 119.9(5) | Pd3 | Pd1 | Pd4 | 113.742(13) |
| C34  | C35 | C36 | 120.4(5) | P1  | Pd2 | P3  | 102.02(3)   |
| C31  | C36 | C35 | 119.9(4) | P1  | Pd2 | P4  | 101.53(4)   |
| C38  | C37 | C42 | 118.7(4) | P1  | Pd2 | Pd1 | 53.78(2)    |
| C38  | C37 | P5  | 118.5(3) | P1  | Pd2 | S3  | 146.59(3)   |
| C42  | C37 | P5  | 122.6(3) | P4  | Pd2 | P3  | 156.45(3)   |
| C37  | C38 | C39 | 120.4(4) | P4  | Pd2 | Pd1 | 152.60(3)   |

|     |     |     |          |     |     |     |           |
|-----|-----|-----|----------|-----|-----|-----|-----------|
| C40 | C39 | C38 | 120.0(5) | P4  | Pd2 | S3  | 110.98(4) |
| C41 | C40 | C39 | 120.4(4) | Pd1 | Pd2 | P3  | 49.72(2)  |
| C40 | C41 | C42 | 119.7(5) | S3  | Pd2 | P3  | 45.69(3)  |
| C41 | C42 | C37 | 120.8(4) | S3  | Pd2 | Pd1 | 92.81(3)  |
| C44 | C43 | P5  | 118.1(3) | P2  | Pd3 | P1  | 101.83(3) |
| C48 | C43 | C44 | 118.8(4) | P2  | Pd3 | P5  | 114.22(4) |
| C48 | C43 | P5  | 123.1(3) | P2  | Pd3 | Pd1 | 54.31(2)  |
| C45 | C44 | C43 | 121.2(5) | P2  | Pd3 | S1  | 146.14(4) |
| C46 | C45 | C44 | 119.1(6) | P5  | Pd3 | P1  | 143.92(3) |
| C47 | C46 | C45 | 120.6(6) | P5  | Pd3 | Pd1 | 163.23(3) |
| C46 | C47 | C48 | 120.7(6) | P5  | Pd3 | S1  | 99.15(4)  |
| C43 | C48 | C47 | 119.5(5) | Pd1 | Pd3 | P1  | 49.06(2)  |
| C50 | C49 | P6  | 118.3(3) | S1  | Pd3 | P1  | 44.87(3)  |
| C54 | C49 | C50 | 117.6(4) | S1  | Pd3 | Pd1 | 91.89(3)  |
| C54 | C49 | P6  | 124.0(3) | P3  | Pd4 | P2  | 102.80(3) |
| C51 | C50 | C49 | 120.4(5) | P3  | Pd4 | P6  | 102.66(4) |
| C52 | C51 | C50 | 121.6(5) | P3  | Pd4 | Pd1 | 53.94(2)  |
| C51 | C52 | C53 | 119.4(5) | P3  | Pd4 | S2  | 147.63(4) |
| C52 | C53 | C54 | 119.6(5) | P6  | Pd4 | P2  | 154.30(3) |
| C49 | C54 | C53 | 121.3(5) | P6  | Pd4 | Pd1 | 155.84(3) |
| C56 | C55 | P6  | 121.9(4) | P6  | Pd4 | S2  | 109.47(4) |
| C60 | C55 | C56 | 119.0(5) | Pd1 | Pd4 | P2  | 49.80(2)  |
| C60 | C55 | P6  | 119.0(4) | S2  | Pd4 | P2  | 45.56(3)  |
| C55 | C56 | C57 | 119.3(6) | S2  | Pd4 | Pd1 | 93.69(3)  |
| C58 | C57 | C56 | 120.7(7) | P1  | S1  | Pd3 | 77.54(4)  |
| C59 | C58 | C57 | 120.7(6) | P2  | S2  | Pd4 | 75.91(4)  |
| C58 | C59 | C60 | 119.6(6) | P3  | S3  | Pd2 | 75.31(4)  |
| C55 | C60 | C59 | 120.7(6) | C4  | S4  | C1  | 92.3(3)   |
| C62 | C61 | C66 | 119.5(5) | C1  | S4A | C3  | 89.6(5)   |
| C62 | C61 | P6  | 122.0(4) | C5  | S5  | C8  | 85.3(3)   |
| C66 | C61 | P6  | 118.4(4) | C5  | S5A | C7  | 85.7(4)   |
| C61 | C62 | C63 | 119.6(7) | C12 | S6  | C9  | 88.2(3)   |
| C64 | C63 | C62 | 118.8(7) | C11 | S6A | C9  | 88.9(3)   |





**Table 4 Torsion Angles for 2c.**

| A   | B   | C   | D   | Angle/°   | A   | B   | C   | D   | Angle/°   |
|-----|-----|-----|-----|-----------|-----|-----|-----|-----|-----------|
| C1  | C2  | C3  | C4  | 5.9(12)   | C42 | C37 | P5  | C31 | 91.5(4)   |
| C1  | C2  | C3  | S4A | -129(3)   | C42 | C37 | P5  | C43 | -16.1(4)  |
| C1  | C2A | C4  | C3  | -9.5(18)  | C42 | C37 | P5  | Pd3 | -145.7(3) |
| C1  | C2A | C4  | S4  | 147(5)    | C43 | C44 | C45 | C46 | 2.2(10)   |
| C2  | C1  | C2A | C4  | 12.0(17)  | C44 | C43 | C48 | C47 | 0.4(7)    |
| C2  | C1  | P1  | Pd1 | -143.7(7) | C44 | C43 | P5  | C31 | -178.7(4) |
| C2  | C1  | P1  | Pd2 | 136.5(7)  | C44 | C43 | P5  | C37 | -71.5(4)  |
| C2  | C1  | P1  | Pd3 | -75.5(7)  | C44 | C43 | P5  | Pd3 | 56.9(4)   |
| C2  | C1  | P1  | S1  | -13.9(8)  | C44 | C45 | C46 | C47 | -0.7(12)  |
| C2  | C1  | S4  | C4  | 1.0(6)    | C45 | C46 | C47 | C48 | -1.0(12)  |
| C2  | C1  | S4A | C3  | -33(2)    | C46 | C47 | C48 | C43 | 1.1(10)   |
| C2  | C3  | C4  | C2A | 1.9(12)   | C48 | C43 | C44 | C45 | -2.0(8)   |
| C2  | C3  | C4  | S4  | -5.0(9)   | C48 | C43 | P5  | C31 | 0.6(4)    |
| C2  | C3  | S4A | C1  | 37(2)     | C48 | C43 | P5  | C37 | 107.8(4)  |
| C2A | C1  | C2  | C3  | -10.2(13) | C48 | C43 | P5  | Pd3 | -123.8(4) |
| C2A | C1  | P1  | Pd1 | 47.9(13)  | C49 | C50 | C51 | C52 | 1.2(8)    |

|     |      |      |     |           |     |     |     |     |           |
|-----|------|------|-----|-----------|-----|-----|-----|-----|-----------|
| C2A | C1   | P1   | Pd2 | -31.9(13) | C50 | C49 | C54 | C53 | -0.8(7)   |
| C2A | C1   | P1   | Pd3 | 116.1(13) | C50 | C49 | P6  | C55 | -73.7(4)  |
| C2A | C1   | P1   | S1  | 177.7(13) | C50 | C49 | P6  | C61 | 178.0(4)  |
| C2A | C1   | S4   | C4  | 27(4)     | C50 | C49 | P6  | Pd4 | 53.4(4)   |
| C2A | C1   | S4A  | C3  | 6.5(10)   | C50 | C51 | C52 | C53 | 0.0(9)    |
| C2A | C4   | S4   | C1  | -23(3)    | C51 | C52 | C53 | C54 | -1.5(8)   |
| C3  | C4   | S4   | C1  | 2.4(5)    | C52 | C53 | C54 | C49 | 1.9(8)    |
| C4  | C3   | S4A  | C1  | -14.5(8)  | C54 | C49 | C50 | C51 | -0.8(7)   |
| C5  | C6   | C7   | C8  | -14.1(13) | C54 | C49 | P6  | C55 | 105.0(4)  |
| C5  | C6   | C7   | S5A | 147(3)    | C54 | C49 | P6  | C61 | -3.4(4)   |
| C5  | C6A  | C8   | C7  | 10.4(13)  | C54 | C49 | P6  | Pd4 | -127.9(3) |
| C5  | C6A  | C8   | S5  | -140(3)   | C55 | C56 | C57 | C58 | 0.2(12)   |
| C6  | C5   | C6A  | C8  | -15.8(10) | C56 | C55 | C60 | C59 | 0.2(9)    |
| C6  | C5   | P2   | Pd1 | -111.6(7) | C56 | C55 | P6  | C49 | -35.0(5)  |
| C6  | C5   | P2   | Pd3 | 172.7(7)  | C56 | C55 | P6  | C61 | 72.2(5)   |
| C6  | C5   | P2   | Pd4 | -45.5(8)  | C56 | C55 | P6  | Pd4 | -164.7(4) |
| C6  | C5   | P2   | S2  | 15.9(8)   | C56 | C57 | C58 | C59 | -0.2(13)  |
| C6  | C5   | S5   | C8  | -3.2(6)   | C57 | C58 | C59 | C60 | 0.1(13)   |
| C6  | C5   | S5A  | C7  | 17.9(16)  | C58 | C59 | C60 | C55 | -0.1(10)  |
| C6  | C7   | C8   | C6A | 1.9(12)   | C60 | C55 | C56 | C57 | -0.2(9)   |
| C6  | C7   | C8   | S5  | 11.2(12)  | C60 | C55 | P6  | C49 | 147.4(4)  |
| C6  | C7   | S5A  | C5  | -23(2)    | C60 | C55 | P6  | C61 | -105.5(4) |
| C6A | C5   | C6   | C7  | 17.3(10)  | C60 | C55 | P6  | Pd4 | 17.7(5)   |
| C6A | C5   | P2   | Pd1 | 40.6(8)   | C61 | C62 | C63 | C64 | 0.0(11)   |
| C6A | C5   | P2   | Pd3 | -35.2(8)  | C62 | C61 | C66 | C65 | -0.9(7)   |
| C6A | C5   | P2   | Pd4 | 106.7(7)  | C62 | C61 | P6  | C49 | 115.2(4)  |
| C6A | C5   | P2   | S2  | 168.0(7)  | C62 | C61 | P6  | C55 | 8.5(5)    |
| C6A | C5   | S5   | C8  | -20.1(14) | C62 | C61 | P6  | Pd4 | -116.1(4) |
| C6A | C5   | S5A  | C7  | 6.7(7)    | C62 | C63 | C64 | C65 | -0.2(13)  |
| C6A | C8   | S5   | C5  | 28(2)     | C63 | C64 | C65 | C66 | -0.2(11)  |
| C7  | C8   | S5   | C5  | -4.8(8)   | C64 | C65 | C66 | C61 | 0.7(8)    |
| C8  | C7   | S5A  | C5  | -1.7(9)   | C66 | C61 | C62 | C63 | 0.5(9)    |
| C9  | C10  | C11  | C12 | 13.0(11)  | C66 | C61 | P6  | C49 | -67.6(4)  |
| C9  | C10  | C11  | S6A | -137(3)   | C66 | C61 | P6  | C55 | -174.3(3) |
| C9  | C10A | C12  | C11 | -6.6(10)  | C66 | C61 | P6  | Pd4 | 61.0(4)   |
| C9  | C10A | C12  | S6  | 153(3)    | P1  | C1  | C2  | C3  | 178.4(5)  |
| C10 | C9   | C10A | C12 | 12.7(9)   | P1  | C1  | C2A | C4  | -176.5(8) |
| C10 | C9   | P3   | Pd1 | 34.8(8)   | P1  | C1  | S4  | C4  | 178.9(3)  |
| C10 | C9   | P3   | Pd2 | 103.8(8)  | P1  | C1  | S4A | C3  | -175.9(3) |
| C10 | C9   | P3   | Pd4 | -44.0(8)  | P2  | C5  | C6  | C7  | 177.3(6)  |



|      |     |     |      |           |     |     |      |     |           |
|------|-----|-----|------|-----------|-----|-----|------|-----|-----------|
| C10  | C9  | P3  | S3   | 166.5(8)  | P2  | C5  | C6A  | C8  | -176.7(6) |
| C10  | C9  | S6  | C12  | 4.4(7)    | P2  | C5  | S5   | C8  | -172.6(3) |
| C10  | C9  | S6A | C11  | -30(2)    | P2  | C5  | S5A  | C7  | 174.2(4)  |
| C10  | C11 | C12 | C10A | -3.9(9)   | P3  | C9  | C10  | C11 | 172.9(5)  |
| C10  | C11 | C12 | S6   | -10.1(9)  | P3  | C9  | C10A | C12 | -176.0(4) |
| C10  | C11 | S6A | C9   | 32(3)     | P3  | C9  | S6   | C12 | -179.4(3) |
| C10A | C9  | C10 | C11  | -14.9(10) | P3  | C9  | S6A  | C11 | 179.4(3)  |
| C10A | C9  | P3  | Pd1  | -133.8(7) | P4  | C13 | C14  | C15 | 178.8(3)  |
| C10A | C9  | P3  | Pd2  | -64.8(7)  | P4  | C13 | C18  | C17 | 179.9(4)  |
| C10A | C9  | P3  | Pd4  | 147.3(7)  | P4  | C19 | C20  | C21 | -175.4(4) |
| C10A | C9  | P3  | S3   | -2.1(7)   | P4  | C19 | C24  | C23 | 175.6(4)  |
| C10A | C9  | S6  | C12  | 16.5(17)  | P4  | C25 | C26  | C27 | -179.8(4) |
| C10A | C9  | S6A | C11  | -1.4(5)   | P4  | C25 | C30  | C29 | 179.3(4)  |
| C10A | C12 | S6  | C9   | -20(2)    | P5  | C31 | C32  | C33 | 179.8(3)  |
| C11  | C12 | S6  | C9   | 3.5(6)    | P5  | C31 | C36  | C35 | 179.8(3)  |
| C12  | C11 | S6A | C9   | -2.3(5)   | P5  | C37 | C38  | C39 | 175.6(4)  |
| C13  | C14 | C15 | C16  | 1.4(7)    | P5  | C37 | C42  | C41 | -176.1(3) |
| C14  | C13 | C18 | C17  | -1.9(8)   | P5  | C43 | C44  | C45 | 177.3(5)  |
| C14  | C13 | P4  | C19  | -77.8(3)  | P5  | C43 | C48  | C47 | -178.9(4) |
| C14  | C13 | P4  | C25  | 175.3(3)  | P6  | C49 | C50  | C51 | 178.0(4)  |
| C14  | C13 | P4  | Pd2  | 48.6(4)   | P6  | C49 | C54  | C53 | -179.4(4) |
| C14  | C15 | C16 | C17  | -2.0(9)   | P6  | C55 | C56  | C57 | -177.9(5) |
| C15  | C16 | C17 | C18  | 0.6(10)   | P6  | C55 | C60  | C59 | 177.9(5)  |
| C16  | C17 | C18 | C13  | 1.4(10)   | P6  | C61 | C62  | C63 | 177.6(5)  |
| C18  | C13 | C14 | C15  | 0.5(6)    | P6  | C61 | C66  | C65 | -178.1(4) |
| C18  | C13 | P4  | C19  | 100.4(4)  | S4  | C1  | C2   | C3  | -4.1(10)  |
| C18  | C13 | P4  | C25  | -6.5(4)   | S4  | C1  | C2A  | C4  | -143(5)   |
| C18  | C13 | P4  | Pd2  | -133.2(4) | S4  | C1  | P1   | Pd1 | 39.1(3)   |
| C19  | C20 | C21 | C22  | 0.3(7)    | S4  | C1  | P1   | Pd2 | -40.7(3)  |
| C20  | C19 | C24 | C23  | -0.5(7)   | S4  | C1  | P1   | Pd3 | 107.3(2)  |
| C20  | C19 | P4  | C13  | -18.3(4)  | S4  | C1  | P1   | S1  | 168.9(2)  |
| C20  | C19 | P4  | C25  | 89.0(4)   | S4  | C1  | S4A  | C3  | 15.9(7)   |
| C20  | C19 | P4  | Pd2  | -147.7(3) | S4A | C1  | C2   | C3  | 133(3)    |
| C20  | C21 | C22 | C23  | -1.3(8)   | S4A | C1  | C2A  | C4  | 0.7(18)   |
| C21  | C22 | C23 | C24  | 1.5(8)    | S4A | C1  | P1   | Pd1 | -129.1(5) |
| C22  | C23 | C24 | C19  | -0.6(8)   | S4A | C1  | P1   | Pd2 | 151.1(5)  |
| C24  | C19 | C20 | C21  | 0.6(7)    | S4A | C1  | P1   | Pd3 | -60.9(5)  |
| C24  | C19 | P4  | C13  | 165.7(4)  | S4A | C1  | P1   | S1  | 0.7(5)    |
| C24  | C19 | P4  | C25  | -86.9(4)  | S4A | C1  | S4   | C4  | -13.0(6)  |
| C24  | C19 | P4  | Pd2  | 36.3(4)   | S4A | C3  | C4   | C2A | 15.5(13)  |

|     |     |     |     |           |     |     |      |      |            |
|-----|-----|-----|-----|-----------|-----|-----|------|------|------------|
| C25 | C26 | C27 | C28 | -1.1(8)   | S4A | C3  | C4   | S4   | 8.6(9)     |
| C26 | C25 | C30 | C29 | -2.9(7)   | S5  | C5  | C6   | C7   | 11.2(11)   |
| C26 | C25 | P4  | C13 | 109.0(4)  | S5  | C5  | C6A  | C8   | 148(2)     |
| C26 | C25 | P4  | C19 | 1.3(4)    | S5  | C5  | P2   | Pd1  | 53.9(3)    |
| C26 | C25 | P4  | Pd2 | -121.6(4) | S5  | C5  | P2   | Pd3  | -21.8(4)   |
| C26 | C27 | C28 | C29 | 0.0(9)    | S5  | C5  | P2   | Pd4  | 120.0(3)   |
| C27 | C28 | C29 | C30 | -0.4(9)   | S5  | C5  | P2   | S2   | -178.6(3)  |
| C28 | C29 | C30 | C25 | 1.9(8)    | S5  | C5  | S5A  | C7   | -2.2(6)    |
| C30 | C25 | C26 | C27 | 2.5(7)    | S5A | C5  | C6   | C7   | -152(2)    |
| C30 | C25 | P4  | C13 | -73.3(4)  | S5A | C5  | C6A  | C8   | -12.0(11)  |
| C30 | C25 | P4  | C19 | 179.1(3)  | S5A | C5  | P2   | Pd1  | -123.0(3)  |
| C30 | C25 | P4  | Pd2 | 56.1(4)   | S5A | C5  | P2   | Pd3  | 161.3(3)   |
| C31 | C32 | C33 | C34 | 0.4(7)    | S5A | C5  | P2   | Pd4  | -56.9(4)   |
| C32 | C31 | C36 | C35 | 0.2(6)    | S5A | C5  | P2   | S2   | 4.5(4)     |
| C32 | C31 | P5  | C37 | 167.0(3)  | S5A | C5  | S5   | C8   | 3.9(6)     |
| C32 | C31 | P5  | C43 | -85.9(3)  | S5A | C7  | C8   | C6A  | -4.5(12)   |
| C32 | C31 | P5  | Pd3 | 42.0(4)   | S5A | C7  | C8   | S5   | 4.9(12)    |
| C32 | C33 | C34 | C35 | 0.0(8)    | S6  | C9  | C10  | C11  | -11.4(12)  |
| C33 | C34 | C35 | C36 | -0.4(8)   | S6  | C9  | C10A | C12  | -156(2)    |
| C34 | C35 | C36 | C31 | 0.2(7)    | S6  | C9  | P3   | Pd1  | -140.6(3)  |
| C36 | C31 | C32 | C33 | -0.5(6)   | S6  | C9  | P3   | Pd2  | -71.6(3)   |
| C36 | C31 | P5  | C37 | -12.6(4)  | S6  | C9  | P3   | Pd4  | 140.6(3)   |
| C36 | C31 | P5  | C43 | 94.5(4)   | S6  | C9  | P3   | S3   | -8.9(3)    |
| C36 | C31 | P5  | Pd3 | -137.6(3) | S6  | C9  | S6A  | C11  | 5.2(4)     |
| C37 | C38 | C39 | C40 | 0.8(8)    | S6A | C9  | C10  | C11  | 138(3)     |
| C38 | C37 | C42 | C41 | -0.2(7)   | S6A | C9  | C10A | C12  | 5.1(9)     |
| C38 | C37 | P5  | C31 | -84.4(4)  | S6A | C9  | P3   | Pd1  | 45.0(3)    |
| C38 | C37 | P5  | C43 | 168.0(3)  | S6A | C9  | P3   | Pd2  | 114.0(2)   |
| C38 | C37 | P5  | Pd3 | 38.3(4)   | S6A | C9  | P3   | Pd4  | -33.8(3)   |
| C38 | C39 | C40 | C41 | -0.3(8)   | S6A | C9  | P3   | S3   | 176.74(19) |
| C39 | C40 | C41 | C42 | -0.4(8)   | S6A | C9  | S6   | C12  | -5.4(4)    |
| C40 | C41 | C42 | C37 | 0.7(7)    | S6A | C11 | C12  | C10A | 5.4(8)     |
| C42 | C37 | C38 | C39 | -0.6(7)   | S6A | C11 | C12  | S6   | -0.9(7)    |





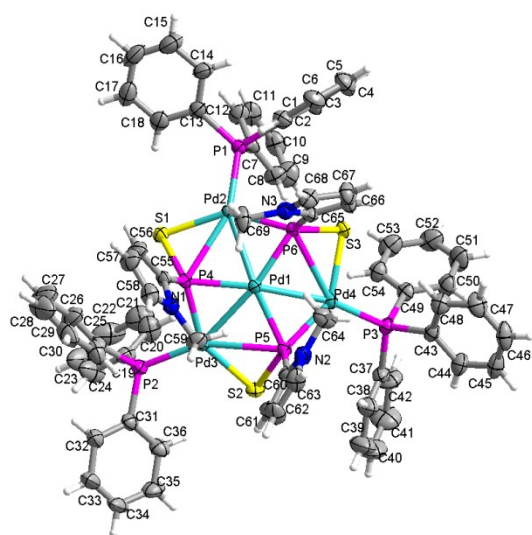

**2d**

**Table 1 Crystal data and structure refinement for 2d.**

|                                             |                                                                                                                 |
|---------------------------------------------|-----------------------------------------------------------------------------------------------------------------|
| Empirical formula                           | C <sub>139</sub> H <sub>128</sub> Cl <sub>2</sub> N <sub>6</sub> P <sub>12</sub> Pd <sub>8</sub> S <sub>6</sub> |
| Formula weight                              | 3368.57                                                                                                         |
| Temperature/K                               | 293(2)                                                                                                          |
| Crystal system                              | monoclinic                                                                                                      |
| Space group                                 | P2 <sub>1</sub> /n                                                                                              |
| a/Å                                         | 16.0071(6)                                                                                                      |
| b/Å                                         | 27.7820(9)                                                                                                      |
| c/Å                                         | 17.5250(6)                                                                                                      |
| α/°                                         | 90                                                                                                              |
| β/°                                         | 113.968(4)                                                                                                      |
| γ/°                                         | 90                                                                                                              |
| Volume/Å <sup>3</sup>                       | 7121.5(5)                                                                                                       |
| Z                                           | 2                                                                                                               |
| ρ <sub>calc</sub> /cm <sup>3</sup>          | 1.571                                                                                                           |
| μ/mm <sup>-1</sup>                          | 10.786                                                                                                          |
| F(000)                                      | 3364.0                                                                                                          |
| Crystal size/mm <sup>3</sup>                | 0.15 × 0.1 × 0.08                                                                                               |
| Radiation                                   | CuKα (λ = 1.54184)                                                                                              |
| 2θ range for data collection/°              | 8.78 to 134.156                                                                                                 |
| Index ranges                                | -19 ≤ h ≤ 18, -33 ≤ k ≤ 32, -20 ≤ l ≤ 18                                                                        |
| Reflections collected                       | 36504                                                                                                           |
| Independent reflections                     | 12702 [R <sub>int</sub> = 0.0484, R <sub>sigma</sub> = 0.0545]                                                  |
| Data/restraints/parameters                  | 12702/20/796                                                                                                    |
| Goodness-of-fit on F <sup>2</sup>           | 1.038                                                                                                           |
| Final R indexes [I ≥ 2σ (I)]                | R <sub>1</sub> = 0.0529, wR <sub>2</sub> = 0.1377                                                               |
| Final R indexes [all data]                  | R <sub>1</sub> = 0.0767, wR <sub>2</sub> = 0.1549                                                               |
| Largest diff. peak/hole / e Å <sup>-3</sup> | 1.37/-0.62                                                                                                      |

**Table 2 Bond Lengths for 2d.**

| Ato<br>m | Ato<br>m | Length/Å  | Ato<br>m | Ato<br>m | Length/Å  |
|----------|----------|-----------|----------|----------|-----------|
| C1       | C2       | 1.381(11) | C46      | C47      | 1.380(17) |
| C1       | C6       | 1.385(11) | C47      | C48      | 1.380(14) |
| C1       | P1       | 1.829(8)  | C49      | C50      | 1.391(12) |
| C2       | C3       | 1.378(13) | C49      | C54      | 1.377(13) |
| C3       | C4       | 1.377(15) | C49      | P3       | 1.837(8)  |
| C4       | C5       | 1.361(15) | C50      | C51      | 1.390(14) |
| C5       | C6       | 1.397(14) | C51      | C52      | 1.359(17) |
| C7       | C8       | 1.382(12) | C52      | C53      | 1.376(16) |
| C7       | C12      | 1.389(12) | C53      | C54      | 1.373(13) |

|     |     |           |     |     |            |
|-----|-----|-----------|-----|-----|------------|
| C7  | P1  | 1.823(8)  | C55 | C56 | 1.370(11)  |
| C8  | C9  | 1.402(13) | C55 | N1  | 1.377(10)  |
| C9  | C10 | 1.354(15) | C55 | P4  | 1.793(7)   |
| C10 | C11 | 1.358(15) | C56 | C57 | 1.386(13)  |
| C11 | C12 | 1.382(13) | C57 | C58 | 1.340(14)  |
| C13 | C14 | 1.372(13) | C58 | N1  | 1.376(10)  |
| C13 | C18 | 1.388(13) | C59 | N1  | 1.435(11)  |
| C13 | P1  | 1.829(9)  | C60 | C61 | 1.384(12)  |
| C14 | C15 | 1.382(15) | C60 | N2  | 1.375(11)  |
| C15 | C16 | 1.33(2)   | C60 | P5  | 1.813(8)   |
| C16 | C17 | 1.359(19) | C61 | C62 | 1.393(14)  |
| C17 | C18 | 1.377(14) | C62 | C63 | 1.361(15)  |
| C19 | C20 | 1.361(15) | C63 | N2  | 1.367(11)  |
| C19 | C24 | 1.373(14) | C64 | N2  | 1.433(11)  |
| C19 | P2  | 1.827(9)  | C65 | C66 | 1.361(11)  |
| C20 | C21 | 1.377(16) | C65 | N3  | 1.392(10)  |
| C21 | C22 | 1.32(2)   | C65 | P6  | 1.790(8)   |
| C22 | C23 | 1.37(2)   | C66 | C67 | 1.406(13)  |
| C23 | C24 | 1.404(18) | C67 | C68 | 1.348(13)  |
| C25 | C26 | 1.361(15) | C68 | N3  | 1.367(11)  |
| C25 | C30 | 1.370(14) | C69 | N3  | 1.435(11)  |
| C25 | P2  | 1.821(9)  | P1  | Pd2 | 2.2896(19) |
| C26 | C27 | 1.402(17) | P2  | Pd3 | 2.287(2)   |
| C27 | C28 | 1.37(2)   | P3  | Pd4 | 2.2887(19) |
| C28 | C29 | 1.35(2)   | P4  | Pd1 | 2.2885(18) |
| C29 | C30 | 1.391(16) | P4  | Pd2 | 2.7577(18) |
| C31 | C32 | 1.375(13) | P4  | Pd3 | 2.2696(19) |
| C31 | C36 | 1.382(13) | P4  | S1  | 2.024(3)   |
| C31 | P2  | 1.836(9)  | P5  | Pd1 | 2.2926(19) |
| C32 | C33 | 1.398(14) | P5  | Pd3 | 2.777(2)   |
| C33 | C34 | 1.315(17) | P5  | Pd4 | 2.2858(19) |
| C34 | C35 | 1.381(16) | P5  | S2  | 2.019(3)   |
| C35 | C36 | 1.389(13) | P6  | Pd1 | 2.2742(19) |
| C37 | C38 | 1.364(15) | P6  | Pd2 | 2.2705(19) |
| C37 | C42 | 1.382(14) | P6  | Pd4 | 2.8139(19) |
| C37 | P3  | 1.822(9)  | P6  | S3  | 2.016(3)   |
| C38 | C39 | 1.405(17) | Pd1 | Pd2 | 2.6672(7)  |
| C39 | C40 | 1.36(2)   | Pd1 | Pd3 | 2.6655(7)  |
| C40 | C41 | 1.34(2)   | Pd1 | Pd4 | 2.6499(7)  |
| C41 | C42 | 1.396(17) | Pd2 | S1  | 2.414(2)   |

|     |     |           |     |     |           |
|-----|-----|-----------|-----|-----|-----------|
| C43 | C44 | 1.406(12) | Pd3 | S2  | 2.410(2)  |
| C43 | C48 | 1.374(13) | Pd4 | S3  | 2.407(2)  |
| C43 | P3  | 1.828(8)  | C70 | Cl1 | 1.681(18) |
| C44 | C45 | 1.384(14) | C70 | Cl2 | 1.640(18) |
| C45 | C46 | 1.354(17) |     |     |           |

**Table3 Bond Angles for 2d.**

| Ato<br>m | Ato<br>m | Ato<br>m | Angle/°   | Ato<br>m | Ato<br>m | Ato<br>m | Angle/°    |
|----------|----------|----------|-----------|----------|----------|----------|------------|
| C2       | C1       | C6       | 118.6(8)  | C63      | N2       | C64      | 123.0(8)   |
| C2       | C1       | P1       | 118.8(6)  | C1       | P1       | Pd2      | 113.5(3)   |
| C6       | C1       | P1       | 122.6(7)  | C7       | P1       | C1       | 103.7(4)   |
| C3       | C2       | C1       | 120.8(9)  | C7       | P1       | C13      | 102.8(4)   |
| C4       | C3       | C2       | 120.6(10) | C7       | P1       | Pd2      | 112.2(3)   |
| C5       | C4       | C3       | 119.0(10) | C13      | P1       | C1       | 103.0(4)   |
| C4       | C5       | C6       | 121.1(10) | C13      | P1       | Pd2      | 119.9(3)   |
| C1       | C6       | C5       | 119.7(9)  | C19      | P2       | C31      | 103.3(4)   |
| C8       | C7       | C12      | 118.6(8)  | C19      | P2       | Pd3      | 113.8(3)   |
| C8       | C7       | P1       | 117.8(6)  | C25      | P2       | C19      | 104.2(5)   |
| C12      | C7       | P1       | 123.6(7)  | C25      | P2       | C31      | 104.2(4)   |
| C7       | C8       | C9       | 119.4(9)  | C25      | P2       | Pd3      | 111.7(3)   |
| C10      | C9       | C8       | 120.8(11) | C31      | P2       | Pd3      | 118.3(3)   |
| C9       | C10      | C11      | 120.3(9)  | C37      | P3       | C43      | 103.8(4)   |
| C10      | C11      | C12      | 120.2(9)  | C37      | P3       | C49      | 103.7(4)   |
| C11      | C12      | C7       | 120.7(10) | C37      | P3       | Pd4      | 117.5(3)   |
| C14      | C13      | C18      | 118.4(9)  | C43      | P3       | C49      | 101.3(4)   |
| C14      | C13      | P1       | 123.7(8)  | C43      | P3       | Pd4      | 115.6(3)   |
| C18      | C13      | P1       | 117.6(8)  | C49      | P3       | Pd4      | 113.0(3)   |
| C13      | C14      | C15      | 119.8(12) | C55      | P4       | Pd1      | 114.8(3)   |
| C16      | C15      | C14      | 120.6(14) | C55      | P4       | Pd2      | 111.3(3)   |
| C15      | C16      | C17      | 121.6(12) | C55      | P4       | Pd3      | 116.8(3)   |
| C16      | C17      | C18      | 118.6(13) | C55      | P4       | S1       | 106.7(3)   |
| C17      | C18      | C13      | 121.0(12) | Pd1      | P4       | Pd2      | 63.01(5)   |
| C20      | C19      | C24      | 119.2(10) | Pd3      | P4       | Pd1      | 71.57(6)   |
| C20      | C19      | P2       | 119.4(8)  | Pd3      | P4       | Pd2      | 123.84(7)  |
| C24      | C19      | P2       | 121.3(9)  | S1       | P4       | Pd1      | 116.69(10) |
| C19      | C20      | C21      | 121.2(13) | S1       | P4       | Pd2      | 58.26(7)   |
| C22      | C21      | C20      | 120.9(15) | S1       | P4       | Pd3      | 126.58(11) |
| C21      | C22      | C23      | 119.5(13) | C60      | P5       | Pd1      | 110.8(3)   |
| C22      | C23      | C24      | 120.8(15) | C60      | P5       | Pd3      | 105.9(3)   |



|     |     |     |           |     |     |     |            |
|-----|-----|-----|-----------|-----|-----|-----|------------|
| C19 | C24 | C23 | 118.3(14) | C60 | P5  | Pd4 | 120.5(3)   |
| C26 | C25 | C30 | 118.7(10) | C60 | P5  | S2  | 105.0(3)   |
| C26 | C25 | P2  | 121.7(9)  | Pd1 | P5  | Pd3 | 62.59(5)   |
| C30 | C25 | P2  | 119.4(9)  | Pd4 | P5  | Pd1 | 70.73(6)   |
| C25 | C26 | C27 | 119.9(14) | Pd4 | P5  | Pd3 | 122.90(8)  |
| C28 | C27 | C26 | 118.5(16) | S2  | P5  | Pd1 | 116.34(10) |
| C29 | C28 | C27 | 123.7(15) | S2  | P5  | Pd3 | 57.78(8)   |
| C28 | C29 | C30 | 115.8(16) | S2  | P5  | Pd4 | 128.30(11) |
| C25 | C30 | C29 | 123.4(14) | C65 | P6  | Pd1 | 116.8(3)   |
| C32 | C31 | C36 | 118.3(9)  | C65 | P6  | Pd2 | 118.5(3)   |
| C32 | C31 | P2  | 123.8(8)  | C65 | P6  | Pd4 | 112.5(3)   |
| C36 | C31 | P2  | 117.8(7)  | C65 | P6  | S3  | 105.7(3)   |
| C31 | C32 | C33 | 120.7(12) | Pd1 | P6  | Pd4 | 61.70(5)   |
| C34 | C33 | C32 | 120.7(13) | Pd2 | P6  | Pd1 | 71.87(6)   |
| C33 | C34 | C35 | 120.0(10) | Pd2 | P6  | Pd4 | 122.07(8)  |
| C34 | C35 | C36 | 120.5(11) | S3  | P6  | Pd1 | 114.61(10) |
| C31 | C36 | C35 | 119.7(10) | S3  | P6  | Pd2 | 126.24(11) |
| C38 | C37 | C42 | 120.0(10) | S3  | P6  | Pd4 | 56.95(7)   |
| C38 | C37 | P3  | 117.8(8)  | P4  | Pd1 | P5  | 119.70(7)  |
| C42 | C37 | P3  | 122.2(8)  | P4  | Pd1 | Pd2 | 67.12(5)   |
| C37 | C38 | C39 | 121.2(13) | P4  | Pd1 | Pd3 | 53.88(5)   |
| C40 | C39 | C38 | 116.6(15) | P4  | Pd1 | Pd4 | 162.62(5)  |
| C41 | C40 | C39 | 123.9(15) | P5  | Pd1 | Pd2 | 162.94(5)  |
| C40 | C41 | C42 | 119.4(14) | P5  | Pd1 | Pd3 | 67.64(5)   |
| C37 | C42 | C41 | 118.8(13) | P5  | Pd1 | Pd4 | 54.52(5)   |
| C44 | C43 | P3  | 123.0(7)  | P6  | Pd1 | P4  | 118.75(7)  |
| C48 | C43 | C44 | 117.8(9)  | P6  | Pd1 | P5  | 121.54(7)  |
| C48 | C43 | P3  | 119.0(7)  | P6  | Pd1 | Pd2 | 54.00(5)   |
| C45 | C44 | C43 | 120.5(10) | P6  | Pd1 | Pd3 | 163.42(5)  |
| C46 | C45 | C44 | 120.7(11) | P6  | Pd1 | Pd4 | 69.22(5)   |
| C45 | C46 | C47 | 119.4(10) | Pd3 | Pd1 | Pd2 | 112.79(2)  |
| C46 | C47 | C48 | 120.8(11) | Pd4 | Pd1 | Pd2 | 113.88(2)  |
| C43 | C48 | C47 | 120.7(10) | Pd4 | Pd1 | Pd3 | 113.82(2)  |
| C50 | C49 | P3  | 122.8(7)  | P1  | Pd2 | P4  | 156.15(7)  |
| C54 | C49 | C50 | 118.0(8)  | P1  | Pd2 | Pd1 | 152.59(6)  |
| C54 | C49 | P3  | 119.2(7)  | P1  | Pd2 | S1  | 110.93(7)  |
| C51 | C50 | C49 | 119.4(10) | P6  | Pd2 | P1  | 101.60(7)  |
| C52 | C51 | C50 | 121.4(11) | P6  | Pd2 | P4  | 102.25(6)  |
| C51 | C52 | C53 | 119.6(10) | P6  | Pd2 | Pd1 | 54.13(5)   |
| C54 | C53 | C52 | 119.4(11) | P6  | Pd2 | S1  | 146.57(7)  |

|     |     |     |           |     |     |     |           |
|-----|-----|-----|-----------|-----|-----|-----|-----------|
| C53 | C54 | C49 | 122.2(10) | Pd1 | Pd2 | P4  | 49.87(4)  |
| C56 | C55 | N1  | 106.0(7)  | S1  | Pd2 | P4  | 45.47(6)  |
| C56 | C55 | P4  | 128.9(7)  | S1  | Pd2 | Pd1 | 92.45(5)  |
| N1  | C55 | P4  | 125.1(6)  | P2  | Pd3 | P5  | 155.14(7) |
| C55 | C56 | C57 | 108.4(9)  | P2  | Pd3 | Pd1 | 155.08(6) |
| C58 | C57 | C56 | 108.8(8)  | P2  | Pd3 | S2  | 111.35(7) |
| C57 | C58 | N1  | 107.2(8)  | P4  | Pd3 | P2  | 101.40(7) |
| C61 | C60 | P5  | 127.9(7)  | P4  | Pd3 | P5  | 102.97(6) |
| N2  | C60 | C61 | 107.1(8)  | P4  | Pd3 | Pd1 | 54.54(5)  |
| N2  | C60 | P5  | 124.4(6)  | P4  | Pd3 | S2  | 146.88(7) |
| C60 | C61 | C62 | 107.8(10) | Pd1 | Pd3 | P5  | 49.77(4)  |
| C63 | C62 | C61 | 107.7(9)  | S2  | Pd3 | P5  | 45.13(6)  |
| C62 | C63 | N2  | 108.5(9)  | S2  | Pd3 | Pd1 | 92.35(5)  |
| C66 | C65 | N3  | 106.9(7)  | P3  | Pd4 | P6  | 143.61(7) |
| C66 | C65 | P6  | 129.0(7)  | P3  | Pd4 | Pd1 | 163.64(6) |
| N3  | C65 | P6  | 124.1(6)  | P3  | Pd4 | S3  | 99.28(7)  |
| C65 | C66 | C67 | 108.7(8)  | P5  | Pd4 | P3  | 114.08(7) |
| C68 | C67 | C66 | 107.0(8)  | P5  | Pd4 | P6  | 102.30(6) |
| C67 | C68 | N3  | 109.3(9)  | P5  | Pd4 | Pd1 | 54.76(5)  |
| C55 | N1  | C59 | 127.3(7)  | P5  | Pd4 | S3  | 145.83(7) |
| C58 | N1  | C55 | 109.6(7)  | Pd1 | Pd4 | P6  | 49.08(4)  |
| C58 | N1  | C59 | 123.1(8)  | S3  | Pd4 | P6  | 44.59(6)  |
| C65 | N3  | C69 | 127.1(7)  | S3  | Pd4 | Pd1 | 91.07(5)  |
| C68 | N3  | C65 | 108.2(8)  | P4  | S1  | Pd2 | 76.27(8)  |
| C68 | N3  | C69 | 124.7(8)  | P5  | S2  | Pd3 | 77.09(8)  |
| C60 | N2  | C64 | 128.1(7)  | P6  | S3  | Pd4 | 78.46(8)  |
| C63 | N2  | C60 | 108.9(8)  | Cl2 | C70 | Cl1 | 113.4(17) |

**Table 4 Torsion Angles for 2d.**

| A  | B  | C  | D               | Angle/°   | A   | B   | C   | D               | Angle/°   |
|----|----|----|-----------------|-----------|-----|-----|-----|-----------------|-----------|
| C1 | C2 | C3 | C4              | 0.5(16)   | C45 | C46 | C47 | C48             | 0.1(18)   |
| C2 | C1 | C6 | C5              | -1.7(15)  | C46 | C47 | C48 | C43             | -2.8(17)  |
| C2 | C1 | P1 | C7              | -177.1(7) | C48 | C43 | C44 | C45             | -1.9(14)  |
| C2 | C1 | P1 | C13             | 76.1(7)   | C48 | C43 | P3  | C37             | -169.4(7) |
| C2 | C1 | P1 | Pd <sub>2</sub> | -55.1(7)  | C48 | C43 | P3  | C49             | 83.3(8)   |
| C2 | C3 | C4 | C5              | -0.1(18)  | C48 | C43 | P3  | Pd <sub>4</sub> | -39.2(8)  |
| C3 | C4 | C5 | C6              | -1.1(19)  | C49 | C50 | C51 | C52             | -2.0(19)  |
| C4 | C5 | C6 | C1              | 2.1(18)   | C50 | C49 | C54 | C53             | 2.1(15)   |

|                                   |                                    |
|-----------------------------------|------------------------------------|
| C6 C1 C2 C3 0.5(14)               | C50 C49 P3 C37 -91.9(8)            |
| C6 C1 P1 C7 2.5(9)                | C50 C49 P3 C43 15.5(9)             |
| C6 C1 P1 C13 -104.3(8)            | C50 C49 P3 $\text{Pd}_4$ 139.8(7)  |
| C6 C1 P1 $\text{Pd}_2$ 124.5(7)   | C50 C51 C52 C53 3(2)               |
| C7 C8 C9 C10 1.7(18)              | C51 C52 C53 C54 -1.0(19)           |
| C8 C7 C12 C11 -0.8(15)            | C52 C53 C54 C49 -1.4(17)           |
| C8 C7 P1 C1 86.2(8)               | C54 C49 C50 C51 -0.4(15)           |
| C8 C7 P1 C13 -166.8(8)            | C54 C49 P3 C37 89.1(8)             |
| C8 C7 P1 $\text{Pd}_2$ -36.6(8)   | C54 C49 P3 C43 -163.5(7)           |
| C8 C9 C10 C11 -2.7(19)            | C54 C49 P3 $\text{Pd}_4$ -39.3(8)  |
| C9 C10 C11 C12 1.9(18)            | C55 C56 C57 C58 -1.3(12)           |
| C10 C11 C12 C7 -0.2(17)           | C56 C55 N1 C58 1.3(10)             |
| C12 C7 C8 C9 0.0(15)              | C56 C55 N1 C59 -179.4(9)           |
| C12 C7 P1 C1 -91.5(8)             | C56 C55 P4 $\text{Pd}_1$ 125.7(8)  |
| C12 C7 P1 C13 15.5(9)             | C56 C55 P4 $\text{Pd}_2$ 56.5(9)   |
| C12 C7 P1 $\text{Pd}_2$ 145.6(7)  | C56 C55 P4 $\text{Pd}_3$ -153.3(7) |
| C13 C14 C15 C16 0(2)              | C56 C55 P4 S1 -5.3(9)              |
| C14 C13 C18 C17 -0.6(14)          | C56 C57 C58 N1 2.1(12)             |
| C14 C13 P1 C1 8.6(9)              | C57 C58 N1 C55 -2.2(11)            |
| C14 C13 P1 C7 -98.9(8)            | C57 C58 N1 C59 178.5(9)            |
| C14 C13 P1 $\text{Pd}_2$ 135.9(7) | C60 C61 C62 C63 -1.6(13)           |
| C14 C15 C16 C17 0(2)              | C61 C60 N2 C63 0.5(10)             |
| C15 C16 C17 C18 0(2)              | C61 C60 N2 C64 178.0(10)           |
| C16 C17 C18 C13 0.3(16)           | C61 C60 P5 $\text{Pd}_1$ 120.2(8)  |
| C18 C13 C14 C15 0.6(15)           | C61 C60 P5 $\text{Pd}_3$ 54.1(9)   |
| C18 C13 P1 C1 -176.7(7)           | C61 C60 P5 $\text{Pd}_4$ -160.5(8) |
| C18 C13 P1 C7 75.8(7)             | C61 C60 P5 S2 -6.1(9)              |
| C18 C13 P1 $\text{Pd}_2$ -49.4(8) | C61 C62 C63 N2 1.9(13)             |
| C19 C20 C21 C22 -2(2)             | C62 C63 N2 C60 -1.4(12)            |

|                                   |                                    |
|-----------------------------------|------------------------------------|
| C20 C19 C24 C23 0(2)              | C62 C63 N2 C64 -179.1(10)          |
| C20 C19 P2 C25 112.0(10)          | C65 C66 C67 C68 -0.4(12)           |
| C20 C19 P2 C31 -139.4(9)          | C66 C65 N3 C68 -0.7(10)            |
| C20 C19 P2 $\text{Pd}_3$ -9.9(10) | C66 C65 N3 C69 -179.0(9)           |
| C20 C21 C22 C23 4(3)              | C66 C65 P6 $\text{Pd}_1$ 131.1(8)  |
| C21 C22 C23 C24 -5(3)             | C66 C65 P6 $\text{Pd}_2$ -146.0(7) |
| C22 C23 C24 C19 3(3)              | C66 C65 P6 $\text{Pd}_4$ 62.5(9)   |
| C24 C19 C20 C21 0(2)              | C66 C65 P6 S3 2.3(9)               |
| C24 C19 P2 C25 -66.1(10)          | C66 C67 C68 N3 -0.1(12)            |
| C24 C19 P2 C31 42.6(11)           | C67 C68 N3 C65 0.5(11)             |
| C24 C19 P2 $\text{Pd}_3$ 172.1(9) | C67 C68 N3 C69 178.8(10)           |
| C25 C26 C27 C28 -1(3)             | N1 C55 C56 C57 0.0(10)             |
| C26 C25 C30 C29 2.3(17)           | N1 C55 P4 $\text{Pd}_1$ -51.4(7)   |
| C26 C25 P2 C19 -14.7(10)          | N1 C55 P4 $\text{Pd}_2$ -120.5(6)  |
| C26 C25 P2 C31 -122.7(9)          | N1 C55 P4 $\text{Pd}_3$ 29.6(8)    |
| C26 C25 P2 $\text{Pd}_3$ 108.5(9) | N1 C55 P4 S1 177.7(6)              |
| C26 C27 C28 C29 1(3)              | N3 C65 C66 C67 0.7(11)             |
| C27 C28 C29 C30 1(3)              | N3 C65 P6 $\text{Pd}_1$ -50.2(8)   |
| C28 C29 C30 C25 -2(2)             | N3 C65 P6 $\text{Pd}_2$ 32.7(8)    |
| C30 C25 C26 C27 -0.7(19)          | N3 C65 P6 $\text{Pd}_4$ -118.8(7)  |
| C30 C25 P2 C19 171.8(8)           | N3 C65 P6 S3 -179.0(6)             |
| C30 C25 P2 C31 63.9(9)            | N2 C60 C61 C62 0.7(11)             |
| C30 C25 P2 $\text{Pd}_3$ -65.0(8) | N2 C60 P5 $\text{Pd}_1$ -49.2(8)   |
| C31 C32 C33 C34 -2(2)             | N2 C60 P5 $\text{Pd}_3$ -115.4(7)  |
| C32 C31 C36 C35 1.5(14)           | N2 C60 P5 $\text{Pd}_4$ 30.0(9)    |
| C32 C31 P2 C19 -100.0(9)          | N2 C60 P5 S2 -175.6(7)             |
| C32 C31 P2 C25 8.6(10)            | P1 C1 C2 C3 -179.9(8)              |

|                              |                           |
|------------------------------|---------------------------|
| C32 C31 P2 Pd<br>3 133.3(8)  | P1 C1 C6 C5 178.7(8)      |
| C32 C33 C34 C35 3(2)         | P1 C7 C8 C9 -177.9(9)     |
| C33 C34 C35 C36 -2.0(19)     | P1 C7 C12 C11 177.0(8)    |
| C34 C35 C36 C31 -0.5(16)     | P1 C13 C14 C15 175.2(9)   |
| C36 C31 C32 C33 -0.1(16)     | P1 C13 C18 C17 -175.6(8)  |
| C36 C31 P2 C19 80.8(8)       | P2 C19 C20 C21 -178.3(11) |
| C36 C31 P2 C25 -170.6(7)     | P2 C19 C24 C23 177.8(12)  |
| C36 C31 P2 Pd<br>3 -45.9(8)  | P2 C25 C26 C27 -174.3(12) |
| C37 C38 C39 C40 0(2)         | P2 C25 C30 C29 175.9(9)   |
| C38 C37 C42 C41 -1.9(19)     | P2 C31 C32 C33 -179.3(10) |
| C38 C37 P3 C43 74.0(9)       | P2 C31 C36 C35 -179.3(7)  |
| C38 C37 P3 C49 179.5(9)      | P3 C37 C38 C39 179.7(11)  |
| C38 C37 P3 Pd<br>4 -55.0(10) | P3 C37 C42 C41 179.3(11)  |
| C38 C39 C40 C41 1(3)         | P3 C43 C44 C45 173.7(8)   |
| C39 C40 C41 C42 -2(3)        | P3 C43 C48 C47 -172.1(8)  |
| C40 C41 C42 C37 2(3)         | P3 C49 C50 C51 -179.4(9)  |
| C42 C37 C38 C39 0.9(19)      | P3 C49 C54 C53 -178.8(8)  |
| C42 C37 P3 C43 -107.1(9)     | P4 C55 C56 C57 -177.5(7)  |
| C42 C37 P3 C49 -1.7(10)      | P4 C55 N1 C58 179.0(6)    |
| C42 C37 P3 Pd<br>4 123.8(8)  | P4 C55 N1 C59 -1.7(12)    |
| C43 C44 C45 C46 -0.7(16)     | P5 C60 C61 C62 -170.2(7)  |
| C44 C43 C48 C47 3.6(14)      | P5 C60 N2 C63 171.8(7)    |
| C44 C43 P3 C37 15.1(8)       | P5 C60 N2 C64 -10.7(14)   |
| C44 C43 P3 C49 -92.2(8)      | P6 C65 C66 C67 179.5(7)   |
| C44 C43 P3 Pd<br>4 145.3(7)  | P6 C65 N3 C68 -179.6(6)   |
| C44 C45 C46 C47 1.6(17)      | P6 C65 N3 C69 2.1(13)     |

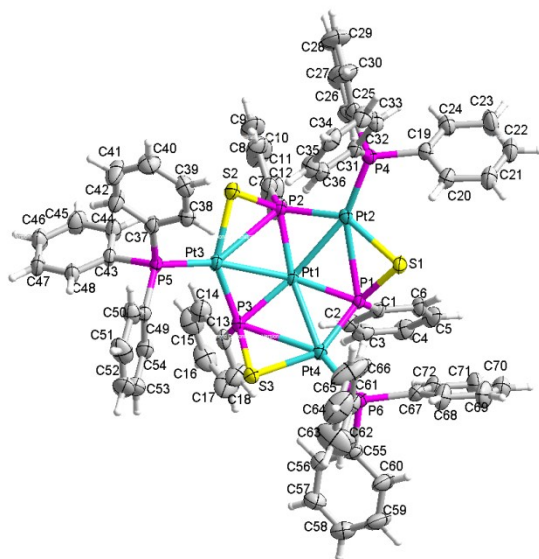

**4a**

**Table 1 Crystal data and structure refinement for 4a.**

|                                        |                                                                    |
|----------------------------------------|--------------------------------------------------------------------|
| Empirical formula                      | $C_{74}H_{64}Cl_4P_6Pt_4S_3$                                       |
| Formula weight                         | 2157.41                                                            |
| Temperature/K                          | 293(2)                                                             |
| Crystal system                         | triclinic                                                          |
| Space group                            | P-1                                                                |
| a/Å                                    | 15.0406(3)                                                         |
| b/Å                                    | 15.4322(3)                                                         |
| c/Å                                    | 18.0802(4)                                                         |
| $\alpha/^\circ$                        | 67.5107(19)                                                        |
| $\beta/^\circ$                         | 79.6002(17)                                                        |
| $\gamma/^\circ$                        | 78.1335(17)                                                        |
| Volume/Å <sup>3</sup>                  | 3770.42(14)                                                        |
| Z                                      | 2                                                                  |
| $\rho_{\text{calc}}/\text{cm}^3$       | 1.900                                                              |
| $\mu/\text{mm}^{-1}$                   | 17.157                                                             |
| F(000)                                 | 2052.0                                                             |
| Crystal size/mm <sup>3</sup>           | 0.16 × 0.08 × 0.07                                                 |
| Radiation                              | CuK $\alpha$ ( $\lambda = 1.54184$ )                               |
| 2 $\theta$ range for data collection/° | 7.592 to 134.16                                                    |
| Index ranges                           | $-17 \leq h \leq 17$ , $-11 \leq k \leq 18$ , $-20 \leq l \leq 21$ |
| Reflections collected                  | 30681                                                              |
| Independent reflections                | 13463 [ $R_{\text{int}} = 0.0280$ , $R_{\text{sigma}} = 0.0328$ ]  |

Data/restraints/parameters 13463/0/766  
 Goodness-of-fit on  $F^2$  1.043  
 Final R indexes [ $I \geq 2\sigma(I)$ ]  $R_1 = 0.0351$ ,  $wR_2 = 0.0922$   
 Final R indexes [all data]  $R_1 = 0.0413$ ,  $wR_2 = 0.0959$   
 Largest diff. peak/hole /  $e \text{ \AA}^{-3}$  2.59/-1.07

**Table 2 Bond Lengths for 4a.**

| Ato<br>m | Ato<br>m | Length/ $\text{\AA}$ | Ato<br>m | Ato<br>m | Length/ $\text{\AA}$ |
|----------|----------|----------------------|----------|----------|----------------------|
| C1       | C2       | 1.398(10)            | C45      | C46      | 1.364(13)            |
| C1       | C6       | 1.386(9)             | C46      | C47      | 1.346(13)            |
| C1       | P1       | 1.823(6)             | C47      | C48      | 1.382(10)            |
| C2       | C3       | 1.370(10)            | C49      | C50      | 1.365(11)            |
| C3       | C4       | 1.375(12)            | C49      | C54      | 1.388(11)            |
| C4       | C5       | 1.346(13)            | C49      | P5       | 1.848(7)             |
| C5       | C6       | 1.404(11)            | C50      | C51      | 1.375(13)            |
| C7       | C8       | 1.371(12)            | C51      | C52      | 1.353(16)            |
| C7       | C12      | 1.378(12)            | C52      | C53      | 1.393(16)            |
| C7       | P2       | 1.817(8)             | C53      | C54      | 1.379(13)            |
| C8       | C9       | 1.419(14)            | C55      | C56      | 1.371(11)            |
| C9       | C10      | 1.387(18)            | C55      | C60      | 1.371(11)            |
| C10      | C11      | 1.341(17)            | C55      | P6       | 1.823(7)             |
| C11      | C12      | 1.390(13)            | C56      | C57      | 1.397(12)            |
| C13      | C14      | 1.400(12)            | C57      | C58      | 1.351(13)            |
| C13      | C18      | 1.367(12)            | C58      | C59      | 1.344(15)            |
| C13      | P3       | 1.830(7)             | C59      | C60      | 1.386(14)            |
| C14      | C15      | 1.366(14)            | C61      | C62      | 1.366(13)            |
| C15      | C16      | 1.355(16)            | C61      | C66      | 1.359(13)            |
| C16      | C17      | 1.353(17)            | C61      | P6       | 1.819(8)             |
| C17      | C18      | 1.390(13)            | C62      | C63      | 1.409(16)            |
| C19      | C20      | 1.383(10)            | C63      | C64      | 1.35(2)              |
| C19      | C24      | 1.373(10)            | C64      | C65      | 1.38(2)              |
| C19      | P4       | 1.831(7)             | C65      | C66      | 1.361(16)            |
| C20      | C21      | 1.349(11)            | C67      | C68      | 1.382(12)            |
| C21      | C22      | 1.356(14)            | C67      | C72      | 1.398(12)            |
| C22      | C23      | 1.371(15)            | C67      | P6       | 1.840(8)             |
| C23      | C24      | 1.403(12)            | C68      | C69      | 1.379(14)            |
| C25      | C26      | 1.379(13)            | C69      | C70      | 1.382(18)            |
| C25      | C30      | 1.388(12)            | C70      | C71      | 1.376(18)            |
| C25      | P4       | 1.819(7)             | C71      | C72      | 1.362(12)            |

|     |     |           |     |     |            |
|-----|-----|-----------|-----|-----|------------|
| C26 | C27 | 1.367(14) | P1  | Pt1 | 2.2883(15) |
| C27 | C28 | 1.378(17) | P1  | Pt2 | 2.8289(16) |
| C28 | C29 | 1.315(18) | P1  | Pt4 | 2.2248(15) |
| C29 | C30 | 1.393(15) | P1  | S1  | 2.038(2)   |
| C31 | C32 | 1.384(10) | P2  | Pt1 | 2.2753(16) |
| C31 | C36 | 1.407(9)  | P2  | Pt2 | 2.2354(16) |
| C31 | P4  | 1.807(7)  | P2  | Pt3 | 2.8729(16) |
| C32 | C33 | 1.379(11) | P2  | S2  | 2.041(2)   |
| C33 | C34 | 1.379(13) | P3  | Pt1 | 2.2933(16) |
| C34 | C35 | 1.351(12) | P3  | Pt3 | 2.2369(17) |
| C35 | C36 | 1.405(10) | P3  | Pt4 | 2.8569(16) |
| C37 | C38 | 1.401(10) | P3  | S3  | 2.035(2)   |
| C37 | C42 | 1.382(10) | P4  | Pt2 | 2.2299(16) |
| C37 | P5  | 1.824(7)  | P5  | Pt3 | 2.2328(15) |
| C38 | C39 | 1.369(11) | P6  | Pt4 | 2.2297(17) |
| C39 | C40 | 1.351(13) | Pt1 | Pt2 | 2.6838(4)  |
| C40 | C41 | 1.372(14) | Pt1 | Pt3 | 2.6694(3)  |
| C41 | C42 | 1.390(13) | Pt1 | Pt4 | 2.6917(4)  |
| C43 | C44 | 1.390(11) | Pt2 | S1  | 2.3951(16) |
| C43 | C48 | 1.370(9)  | Pt3 | S2  | 2.3786(18) |
| C43 | P5  | 1.842(7)  | Pt4 | S3  | 2.3988(16) |
| C44 | C45 | 1.412(11) |     |     |            |

**Table 3 Bond Angles for 4a.**

| Atom | Atom | Atom | Angle/°   | Atom | Atom | Atom | Angle/°   |
|------|------|------|-----------|------|------|------|-----------|
| C2   | C1   | P1   | 117.9(5)  | C1   | P1   | Pt1  | 113.1(2)  |
| C6   | C1   | C2   | 118.8(6)  | C1   | P1   | Pt2  | 113.0(2)  |
| C6   | C1   | P1   | 123.2(6)  | C1   | P1   | Pt4  | 114.5(2)  |
| C3   | C2   | C1   | 121.0(7)  | C1   | P1   | S1   | 108.5(2)  |
| C2   | C3   | C4   | 119.3(8)  | Pt1  | P1   | Pt2  | 62.21(4)  |
| C5   | C4   | C3   | 121.3(7)  | Pt4  | P1   | Pt1  | 73.21(4)  |
| C4   | C5   | C6   | 120.4(8)  | Pt4  | P1   | Pt2  | 124.15(6) |
| C1   | C6   | C5   | 119.2(8)  | S1   | P1   | Pt1  | 114.79(8) |
| C8   | C7   | C12  | 118.7(8)  | S1   | P1   | Pt2  | 56.17(6)  |
| C8   | C7   | P2   | 120.7(7)  | S1   | P1   | Pt4  | 128.06(9) |
| C12  | C7   | P2   | 120.5(6)  | C7   | P2   | Pt1  | 116.3(3)  |
| C7   | C8   | C9   | 120.9(11) | C7   | P2   | Pt2  | 117.5(2)  |
| C10  | C9   | C8   | 117.7(11) | C7   | P2   | Pt3  | 113.9(2)  |
| C11  | C10  | C9   | 121.7(10) | C7   | P2   | S2   | 107.0(3)  |
| C10  | C11  | C12  | 119.8(11) | Pt1  | P2   | Pt3  | 61.17(4)  |



|     |     |     |           |     |     |     |            |
|-----|-----|-----|-----------|-----|-----|-----|------------|
| C7  | C12 | C11 | 121.1(10) | Pt2 | P2  | Pt1 | 73.02(5)   |
| C14 | C13 | P3  | 118.7(7)  | Pt2 | P2  | Pt3 | 121.92(6)  |
| C18 | C13 | C14 | 118.0(8)  | S2  | P2  | Pt1 | 112.51(9)  |
| C18 | C13 | P3  | 123.0(7)  | S2  | P2  | Pt2 | 126.57(10) |
| C15 | C14 | C13 | 120.7(10) | S2  | P2  | Pt3 | 54.79(6)   |
| C16 | C15 | C14 | 120.2(12) | C13 | P3  | Pt1 | 108.3(2)   |
| C17 | C16 | C15 | 120.4(11) | C13 | P3  | Pt3 | 116.9(3)   |
| C16 | C17 | C18 | 120.3(12) | C13 | P3  | Pt4 | 111.0(2)   |
| C13 | C18 | C17 | 120.3(11) | C13 | P3  | S3  | 108.2(3)   |
| C20 | C19 | P4  | 118.3(6)  | Pt1 | P3  | Pt4 | 61.88(4)   |
| C24 | C19 | C20 | 118.2(7)  | Pt3 | P3  | Pt1 | 72.19(5)   |
| C24 | C19 | P4  | 123.3(6)  | Pt3 | P3  | Pt4 | 121.29(7)  |
| C21 | C20 | C19 | 121.3(8)  | S3  | P3  | Pt1 | 115.22(9)  |
| C20 | C21 | C22 | 120.8(9)  | S3  | P3  | Pt3 | 129.02(10) |
| C21 | C22 | C23 | 120.2(8)  | S3  | P3  | Pt4 | 55.72(6)   |
| C22 | C23 | C24 | 119.0(9)  | C19 | P4  | Pt2 | 115.6(2)   |
| C19 | C24 | C23 | 120.4(9)  | C25 | P4  | C19 | 103.6(3)   |
| C26 | C25 | C30 | 117.9(9)  | C25 | P4  | Pt2 | 115.7(3)   |
| C26 | C25 | P4  | 119.2(7)  | C31 | P4  | C19 | 102.4(3)   |
| C30 | C25 | P4  | 122.8(7)  | C31 | P4  | C25 | 106.8(3)   |
| C27 | C26 | C25 | 120.4(11) | C31 | P4  | Pt2 | 111.5(2)   |
| C26 | C27 | C28 | 121.9(12) | C37 | P5  | C43 | 104.0(3)   |
| C29 | C28 | C27 | 117.4(11) | C37 | P5  | C49 | 103.8(3)   |
| C28 | C29 | C30 | 123.6(12) | C37 | P5  | Pt3 | 113.0(2)   |
| C25 | C30 | C29 | 118.8(12) | C43 | P5  | C49 | 102.4(3)   |
| C32 | C31 | C36 | 117.8(7)  | C43 | P5  | Pt3 | 115.3(2)   |
| C32 | C31 | P4  | 123.2(5)  | C49 | P5  | Pt3 | 116.8(2)   |
| C36 | C31 | P4  | 119.0(5)  | C55 | P6  | C67 | 101.2(3)   |
| C33 | C32 | C31 | 121.7(8)  | C55 | P6  | Pt4 | 115.7(2)   |
| C34 | C33 | C32 | 119.9(8)  | C61 | P6  | C55 | 106.0(4)   |
| C35 | C34 | C33 | 120.1(8)  | C61 | P6  | C67 | 103.2(4)   |
| C34 | C35 | C36 | 121.0(8)  | C61 | P6  | Pt4 | 111.9(3)   |
| C35 | C36 | C31 | 119.5(7)  | C67 | P6  | Pt4 | 117.4(2)   |
| C38 | C37 | P5  | 119.4(5)  | P1  | Pt1 | P3  | 119.65(6)  |
| C42 | C37 | C38 | 117.6(7)  | P1  | Pt1 | Pt2 | 68.83(4)   |
| C42 | C37 | P5  | 122.9(6)  | P1  | Pt1 | Pt3 | 159.71(4)  |
| C39 | C38 | C37 | 120.4(7)  | P1  | Pt1 | Pt4 | 52.31(4)   |
| C40 | C39 | C38 | 121.4(8)  | P2  | Pt1 | P1  | 119.63(6)  |
| C39 | C40 | C41 | 119.6(9)  | P2  | Pt1 | P3  | 120.70(6)  |
| C40 | C41 | C42 | 120.1(9)  | P2  | Pt1 | Pt2 | 52.81(4)   |

|     |     |     |           |     |     |     |             |
|-----|-----|-----|-----------|-----|-----|-----|-------------|
| C37 | C42 | C41 | 120.8(8)  | P2  | Pt1 | Pt3 | 70.53(4)    |
| C44 | C43 | P5  | 116.9(5)  | P2  | Pt1 | Pt4 | 161.72(5)   |
| C48 | C43 | C44 | 120.9(7)  | P3  | Pt1 | Pt2 | 162.68(4)   |
| C48 | C43 | P5  | 122.1(6)  | P3  | Pt1 | Pt3 | 52.93(4)    |
| C43 | C44 | C45 | 116.9(8)  | P3  | Pt1 | Pt4 | 69.40(4)    |
| C46 | C45 | C44 | 120.9(9)  | Pt2 | Pt1 | Pt4 | 112.682(12) |
| C47 | C46 | C45 | 121.1(8)  | Pt3 | Pt1 | Pt2 | 113.500(12) |
| C46 | C47 | C48 | 119.7(8)  | Pt3 | Pt1 | Pt4 | 112.211(12) |
| C43 | C48 | C47 | 120.5(8)  | P2  | Pt2 | P1  | 101.69(5)   |
| C50 | C49 | C54 | 119.6(8)  | P2  | Pt2 | Pt1 | 54.18(4)    |
| C50 | C49 | P5  | 122.5(6)  | P2  | Pt2 | S1  | 145.77(6)   |
| C54 | C49 | P5  | 117.8(6)  | P4  | Pt2 | P1  | 149.44(5)   |
| C49 | C50 | C51 | 121.2(10) | P4  | Pt2 | P2  | 108.82(6)   |
| C52 | C51 | C50 | 120.1(11) | P4  | Pt2 | Pt1 | 158.86(4)   |
| C51 | C52 | C53 | 119.6(10) | P4  | Pt2 | S1  | 104.58(6)   |
| C54 | C53 | C52 | 120.5(11) | Pt1 | Pt2 | P1  | 48.96(3)    |
| C53 | C54 | C49 | 119.0(10) | S1  | Pt2 | P1  | 44.97(5)    |
| C56 | C55 | C60 | 117.4(8)  | S1  | Pt2 | Pt1 | 91.60(4)    |
| C56 | C55 | P6  | 119.7(6)  | P3  | Pt3 | P2  | 101.25(5)   |
| C60 | C55 | P6  | 122.8(7)  | P3  | Pt3 | Pt1 | 54.88(4)    |
| C55 | C56 | C57 | 121.6(8)  | P3  | Pt3 | S2  | 145.26(6)   |
| C58 | C57 | C56 | 119.3(10) | P5  | Pt3 | P2  | 144.01(6)   |
| C59 | C58 | C57 | 120.2(9)  | P5  | Pt3 | P3  | 114.75(6)   |
| C58 | C59 | C60 | 120.7(10) | P5  | Pt3 | Pt1 | 163.93(5)   |
| C55 | C60 | C59 | 120.8(10) | P5  | Pt3 | S2  | 99.67(6)    |
| C62 | C61 | P6  | 123.0(8)  | Pt1 | Pt3 | P2  | 48.31(3)    |
| C66 | C61 | C62 | 119.0(10) | S2  | Pt3 | P2  | 44.51(5)    |
| C66 | C61 | P6  | 118.0(8)  | S2  | Pt3 | Pt1 | 90.52(4)    |
| C61 | C62 | C63 | 121.3(13) | P1  | Pt4 | P3  | 101.69(5)   |
| C64 | C63 | C62 | 117.3(15) | P1  | Pt4 | P6  | 110.11(6)   |
| C63 | C64 | C65 | 121.9(13) | P1  | Pt4 | Pt1 | 54.48(4)    |
| C66 | C65 | C64 | 119.3(14) | P1  | Pt4 | S3  | 145.97(6)   |
| C61 | C66 | C65 | 121.2(13) | P6  | Pt4 | P3  | 148.19(6)   |
| C68 | C67 | C72 | 118.5(8)  | P6  | Pt4 | Pt1 | 160.56(5)   |
| C68 | C67 | P6  | 123.6(7)  | P6  | Pt4 | S3  | 103.71(6)   |
| C72 | C67 | P6  | 117.7(6)  | Pt1 | Pt4 | P3  | 48.71(3)    |
| C69 | C68 | C67 | 120.0(11) | S3  | Pt4 | P3  | 44.52(5)    |
| C68 | C69 | C70 | 120.2(11) | S3  | Pt4 | Pt1 | 91.69(4)    |
| C71 | C70 | C69 | 120.7(11) | P1  | S1  | Pt2 | 78.86(7)    |
| C72 | C71 | C70 | 118.9(12) | P2  | S2  | Pt3 | 80.70(7)    |

C71 C72 C67 121.8(10) P3 S3 Pt4 79.76(7)



**Table 4 Torsion Angles for 4a.**

| A  | B  | C   | D   | Angle/°   | A   | B   | C   | D   | Angle/°   |
|----|----|-----|-----|-----------|-----|-----|-----|-----|-----------|
| C1 | C2 | C3  | C4  | 0.3(12)   | C42 | C37 | P5  | C43 | 10.1(8)   |
| C2 | C1 | C6  | C5  | 0.8(11)   | C42 | C37 | P5  | C49 | -96.7(8)  |
| C2 | C1 | P1  | Pt1 | -32.2(6)  | C42 | C37 | P5  | Pt3 | 135.8(7)  |
| C2 | C1 | P1  | Pt2 | -100.5(5) | C43 | C44 | C45 | C46 | -0.6(16)  |
| C2 | C1 | P1  | Pt4 | 49.2(6)   | C44 | C43 | C48 | C47 | -0.4(13)  |
| C2 | C1 | P1  | S1  | -160.8(5) | C44 | C43 | P5  | C37 | 91.7(7)   |
| C2 | C3 | C4  | C5  | 0.3(13)   | C44 | C43 | P5  | C49 | -160.5(6) |
| C3 | C4 | C5  | C6  | -0.4(14)  | C44 | C43 | P5  | Pt3 | -32.6(7)  |
| C4 | C5 | C6  | C1  | -0.2(12)  | C44 | C45 | C46 | C47 | -0.4(17)  |
| C6 | C1 | C2  | C3  | -0.8(11)  | C45 | C46 | C47 | C48 | 0.9(16)   |
| C6 | C1 | P1  | Pt1 | 151.9(5)  | C46 | C47 | C48 | C43 | -0.5(14)  |
| C6 | C1 | P1  | Pt2 | 83.6(6)   | C48 | C43 | C44 | C45 | 0.9(13)   |
| C6 | C1 | P1  | Pt4 | -126.8(5) | C48 | C43 | P5  | C37 | -85.1(7)  |
| C6 | C1 | P1  | S1  | 23.3(6)   | C48 | C43 | P5  | C49 | 22.8(7)   |
| C7 | C8 | C9  | C10 | 2.2(18)   | C48 | C43 | P5  | Pt3 | 150.7(6)  |
| C8 | C7 | C12 | C11 | -1.1(15)  | C49 | C50 | C51 | C52 | -1.6(16)  |
| C8 | C7 | P2  | Pt1 | 171.7(7)  | C50 | C49 | C54 | C53 | -1.6(12)  |
| C8 | C7 | P2  | Pt2 | -104.7(7) | C50 | C49 | P5  | C37 | 5.2(7)    |
| C8 | C7 | P2  | Pt3 | 103.4(7)  | C50 | C49 | P5  | C43 | -102.8(6) |
| C8 | C7 | P2  | S2  | 44.9(8)   | C50 | C49 | P5  | Pt3 | 130.3(6)  |

C8 C9 C10C11 -3(2) C50 C51 C52 C53 0.4(18)  
C9 C10C11C12 2(2) C51 C52 C53 C54 0.2(17)  
C10C11C12C7 0.2(18) C52 C53 C54 C49 0.5(15)  
C12C7 C8 C9 -0.1(15) C54 C49 C50 C51 2.2(13)  
C12C7 P2 Pt1 -13.4(8) C54 C49 P5 C37 -178.9(6)  
C12C7 P2 Pt2 70.2(8) C54 C49 P5 C43 73.1(6)  
C12C7 P2 Pt3 -81.8(7) C54 C49 P5 Pt3 -53.9(6)  
C12C7 P2 S2 -140.2(7) C55 C56 C57 C58 -0.9(16)  
C13C14C15C16 0.1(17) C56 C55 C60 C59 -2.6(16)  
C14C13C18C17 -1.9(16) C56 C55 P6 C61 109.5(7)  
C14C13P3 Pt1 -74.4(6) C56 C55 P6 C67 -143.1(7)  
C14C13P3 Pt3 4.4(7) C56 C55 P6 Pt4 -15.1(7)  
C14C13P3 Pt4 -140.5(6) C56 C57 C58 C59 -0.7(18)  
C14C13P3 S3 160.1(6) C57 C58 C59 C60 1(2)  
C14C15C16C17 -0.6(19) C58 C59 C60 C55 1(2)  
C15C16C17C18 0(2) C60 C55 C56 C57 2.5(14)  
C16C17C18C13 1.3(19) C60 C55 P6 C61 -74.8(8)  
C18C13C14C15 1.2(14) C60 C55 P6 C67 32.6(9)  
C18C13P3 Pt1 99.0(8) C60 C55 P6 Pt4 160.6(7)  
C18C13P3 Pt3 177.8(7) C61 C62 C63 C64 -3(3)  
C18C13P3 Pt4 32.9(9) C62 C61 C66 C65 -1.2(18)  
C18C13P3 S3 -26.5(9) C62 C61 P6 C55 -1.3(10)  
C19C20C21C22 -1.1(15) C62 C61 P6 C67 -107.2(10)  
C20C19C24C23 -2.6(14) C62 C61 P6 Pt4 125.6(9)  
C20C19P4 C25 169.5(6) C62 C63 C64 C65 1(3)  
C20C19P4 C31 58.6(7) C63 C64 C65 C66 1(3)  
C20C19P4 Pt2 -62.9(6) C64 C65 C66 C61 -1(2)  
C20C21C22C23 -1.2(17) C66 C61 C62 C63 3(2)  
C21C22C23C24 1.5(18) C66 C61 P6 C55 176.9(8)  
C22C23C24C19 0.4(17) C66 C61 P6 C67 71.0(8)  
C24C19C20C21 2.9(13) C66 C61 P6 Pt4 -56.2(9)  
C24C19P4 C25 -15.8(8) C67 C68 C69 C70 0(2)  
C24C19P4 C31 -126.7(7) C68 C67 C72 C71 0.3(14)  
C24C19P4 Pt2 111.9(7) C68 C67 P6 C55 -100.8(8)  
C25C26C27C28 -2.0(18) C68 C67 P6 C61 8.8(9)  
C26C25C30C29 0.2(16) C68 C67 P6 Pt4 132.4(7)  
C26C25P4 C19 88.6(7) C68 C69 C70 C71 0(2)  
C26C25P4 C31 -163.7(7) C69 C70 C71 C72 0(2)  
C26C25P4 Pt2 -38.9(7) C70 C71 C72 C67 -0.5(16)  
C26C27C28C29 3(2) C72 C67 C68 C69 -0.2(15)

C27 C28 C29 C30 -3(2) C72 C67 P6 C55 74.3(7)  
 C28 C29 C30 C25 1(2) C72 C67 P6 C61 -176.2(6)  
 C30 C25 C26 C27 0.3(15) C72 C67 P6 Pt4 -52.6(7)  
 C30 C25 P4 C19 -86.3(8) P1 C1 C2 C3 -176.9(6)  
 C30 C25 P4 C31 21.4(9) P1 C1 C6 C5 176.7(6)  
 C30 C25 P4 Pt2 146.2(7) P2 C7 C8 C9 174.9(8)  
 C31 C32 C33 C34 2.4(13) P2 C7 C12 C11 -176.1(8)  
 C32 C31 C36 C35 0.0(11) P3 C13 C14 C15 174.9(8)  
 C32 C31 P4 C19 34.4(7) P3 C13 C18 C17 -175.3(9)  
 C32 C31 P4 C25 -74.1(7) P4 C19 C20 C21 177.9(7)  
 C32 C31 P4 Pt2 158.6(6) P4 C19 C24 C23 -177.3(8)  
 C32 C33 C34 C35 -2.6(14) P4 C25 C26 C27 -174.8(8)  
 C33 C34 C35 C36 1.5(14) P4 C25 C30 C29 175.2(10)  
 C34 C35 C36 C31 -0.2(13) P4 C31 C32 C33 179.6(7)  
 C36 C31 C32 C33 -1.1(12) P4 C31 C36 C35 179.3(6)  
 C36 C31 P4 C19 -144.9(6) P5 C37 C38 C39 178.6(6)  
 C36 C31 P4 C25 106.6(6) P5 C37 C42 C41 -179.2(9)  
 C36 C31 P4 Pt2 -20.7(6) P5 C43 C44 C45 -175.8(7)  
 C37 C38 C39 C40 -0.5(13) P5 C43 C48 C47 176.2(7)  
 C38 C37 C42 C41 -2.1(15) P5 C49 C50 C51 178.0(7)  
 C38 C37 P5 C43 -167.0(6) P5 C49 C54 C53 -177.6(7)  
 C38 C37 P5 C49 86.2(6) P6 C55 C56 C57 178.4(7)  
 C38 C37 P5 Pt3 -41.2(6) P6 C55 C60 C59 -178.4(10)  
 C38 C39 C40 C41 0.2(16) P6 C61 C62 C63 -178.7(12)  
 C39 C40 C41 C42 -0.9(19) P6 C61 C66 C65 -179.5(10)  
 C40 C41 C42 C37 1.9(19) P6 C67 C68 C69 174.8(9)  
 C42 C37 C38 C39 1.4(12) P6 C67 C72 C71 -175.0(8)







## NMR Spectra

CJK 961 P31CPD

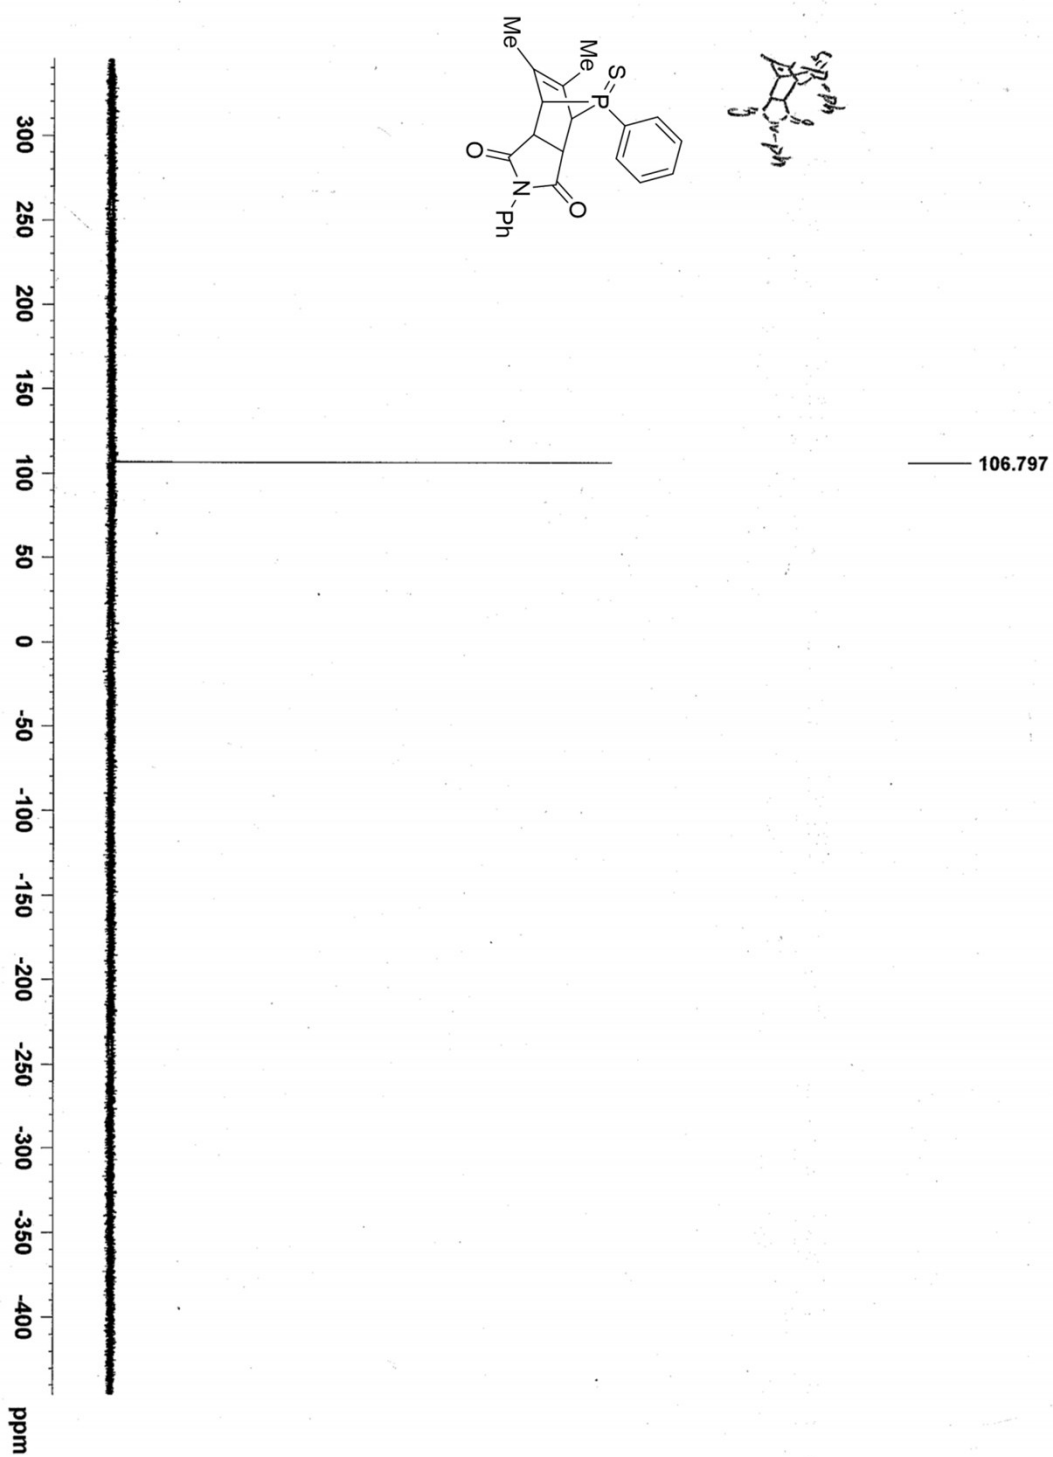

$^{31}\text{P}$  NMR of Compound 1a

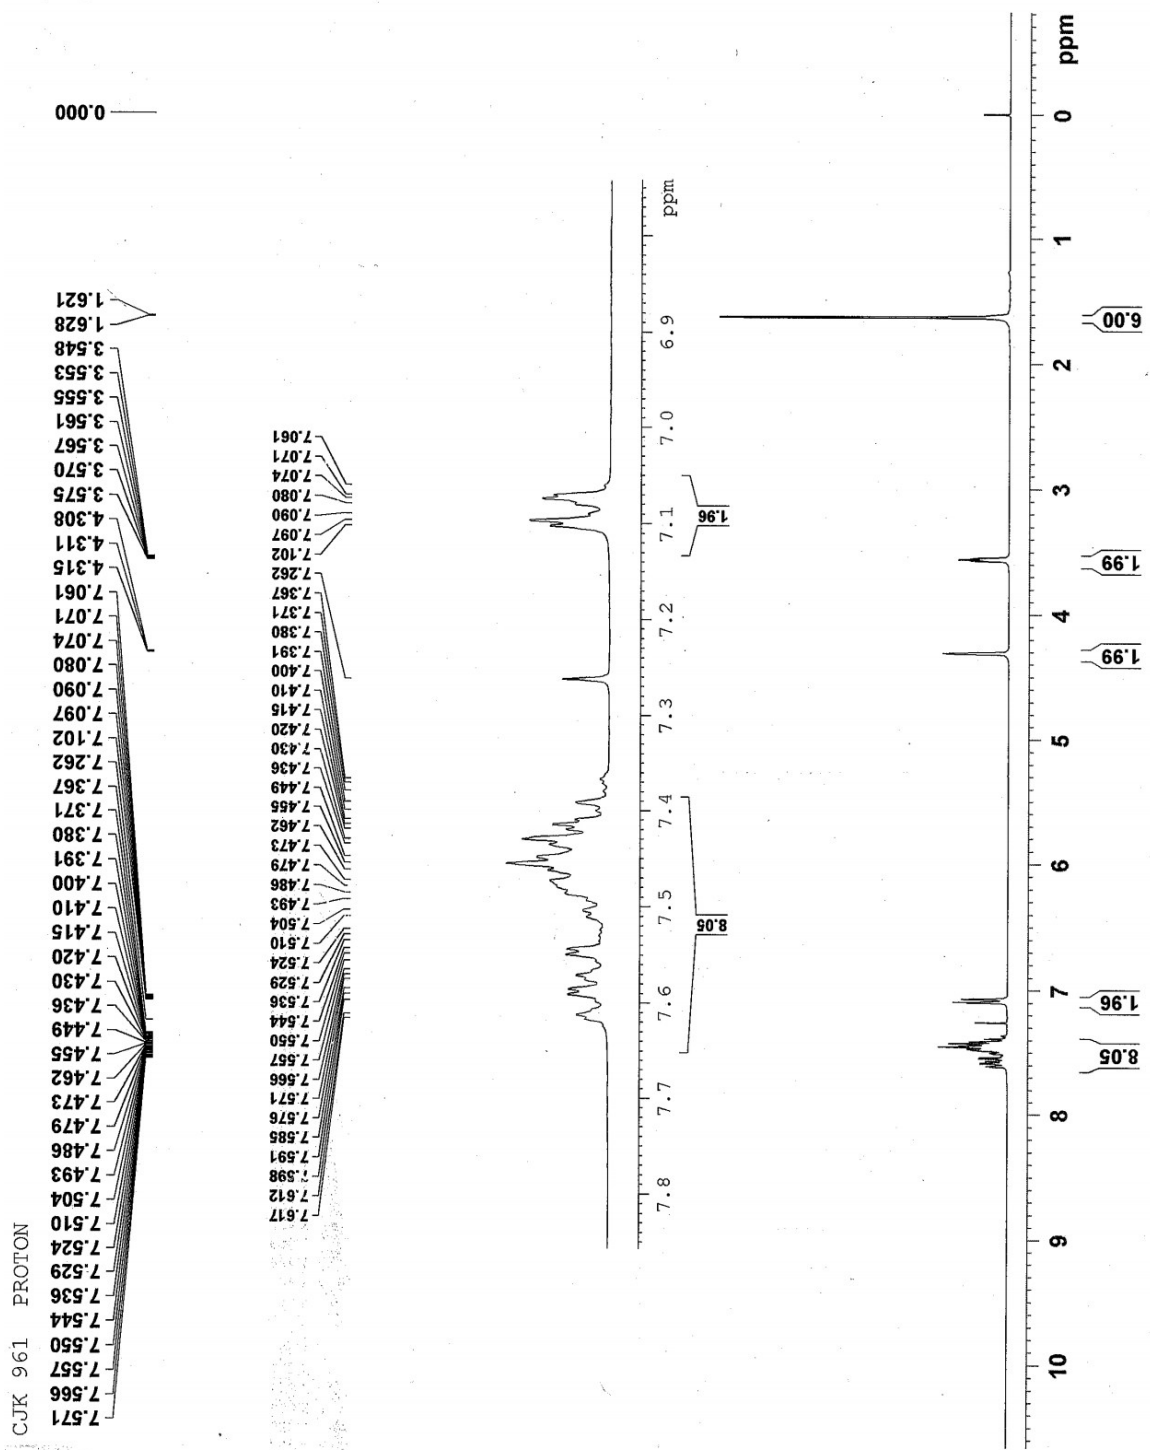

<sup>1</sup>H NMR of Compound 1a

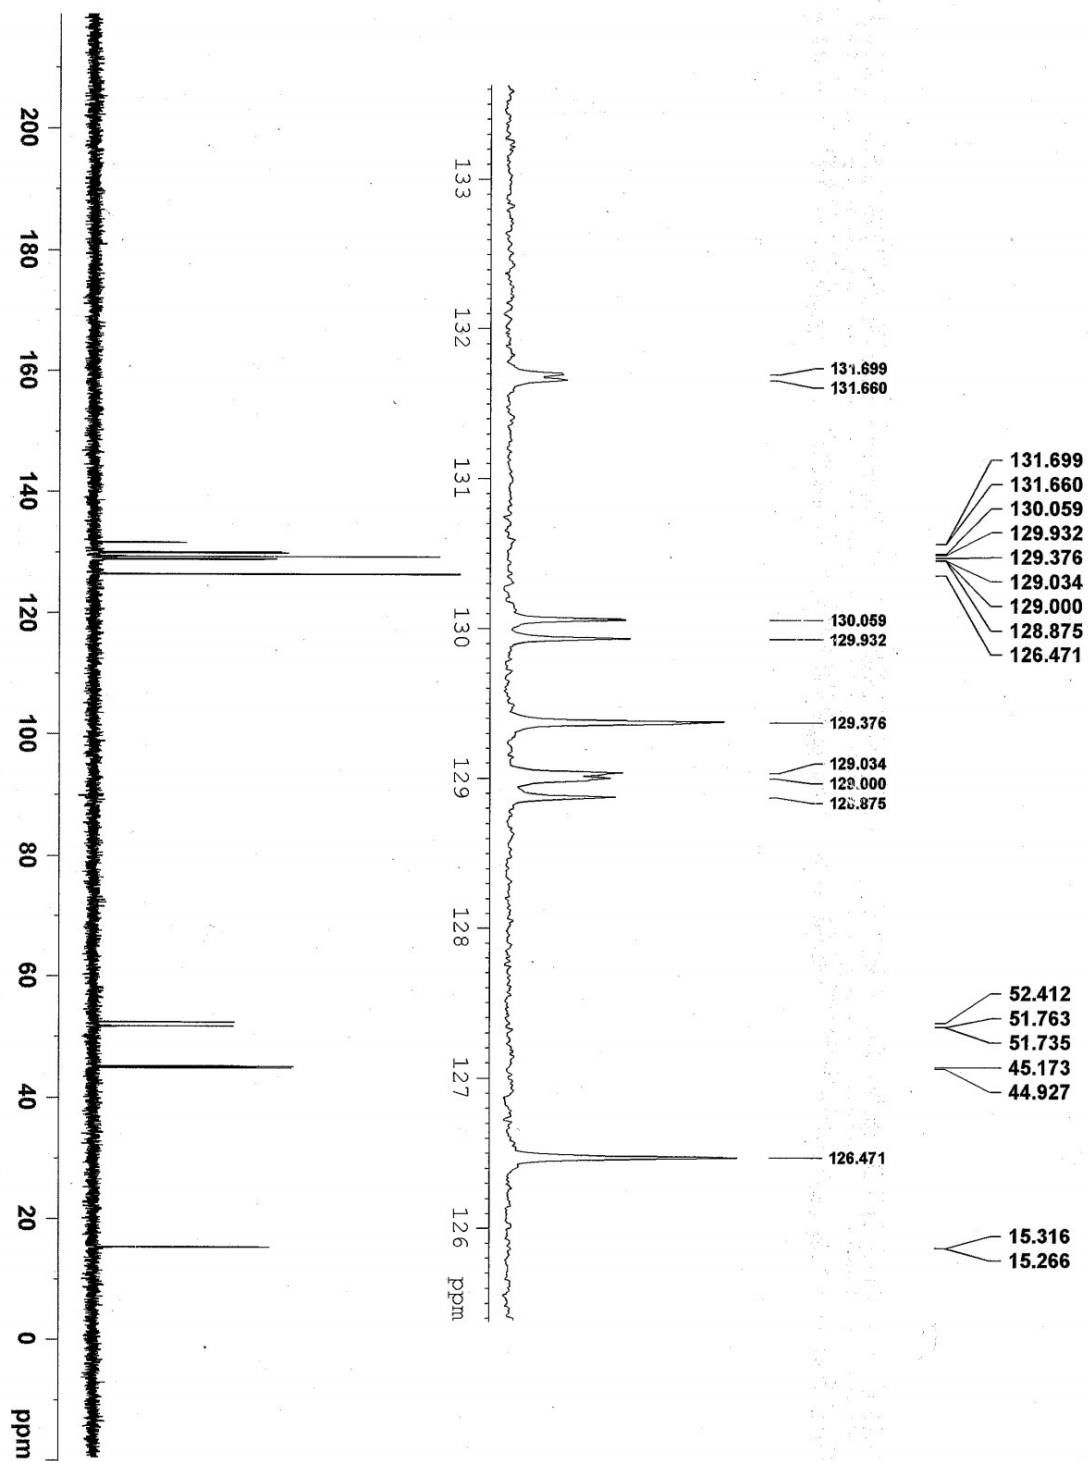

<sup>13</sup>C NMR of Compound 1a

CJK 965 P3ICPD

106.791

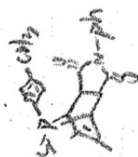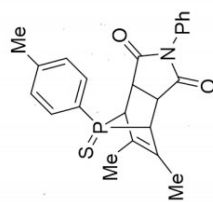

<sup>31</sup>P NMR of Compound 1b

ppm

-400

-350

-300

-250

-200

-150

-100

-50

0

50

100

150

200

250

300

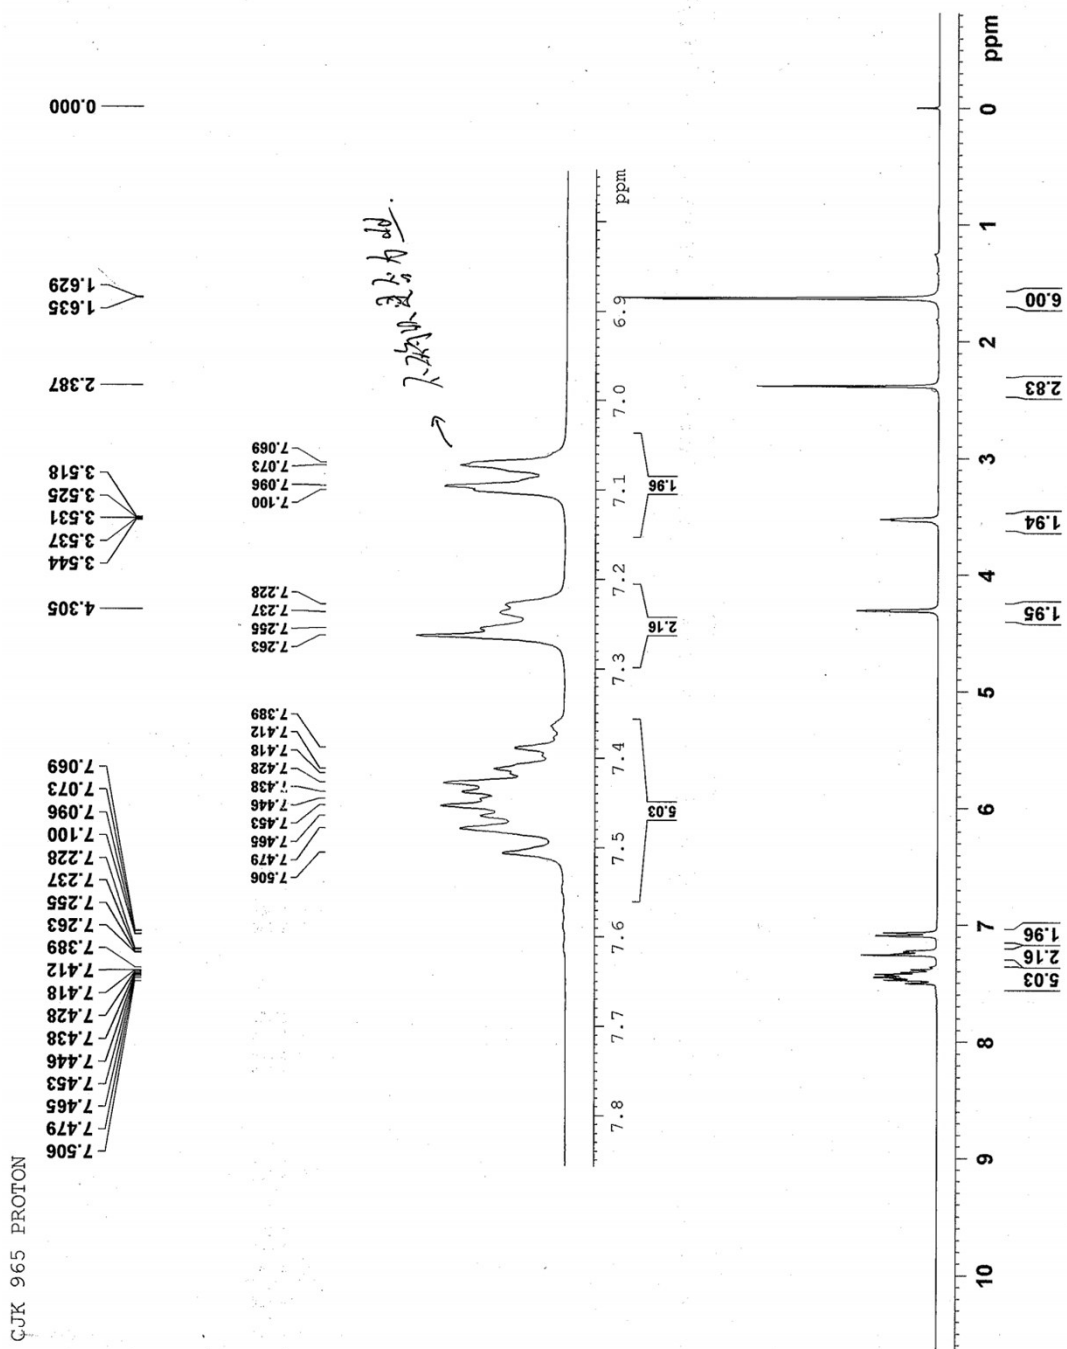

<sup>1</sup>H NMR of Compound 1b

GJK 965 C13CPD

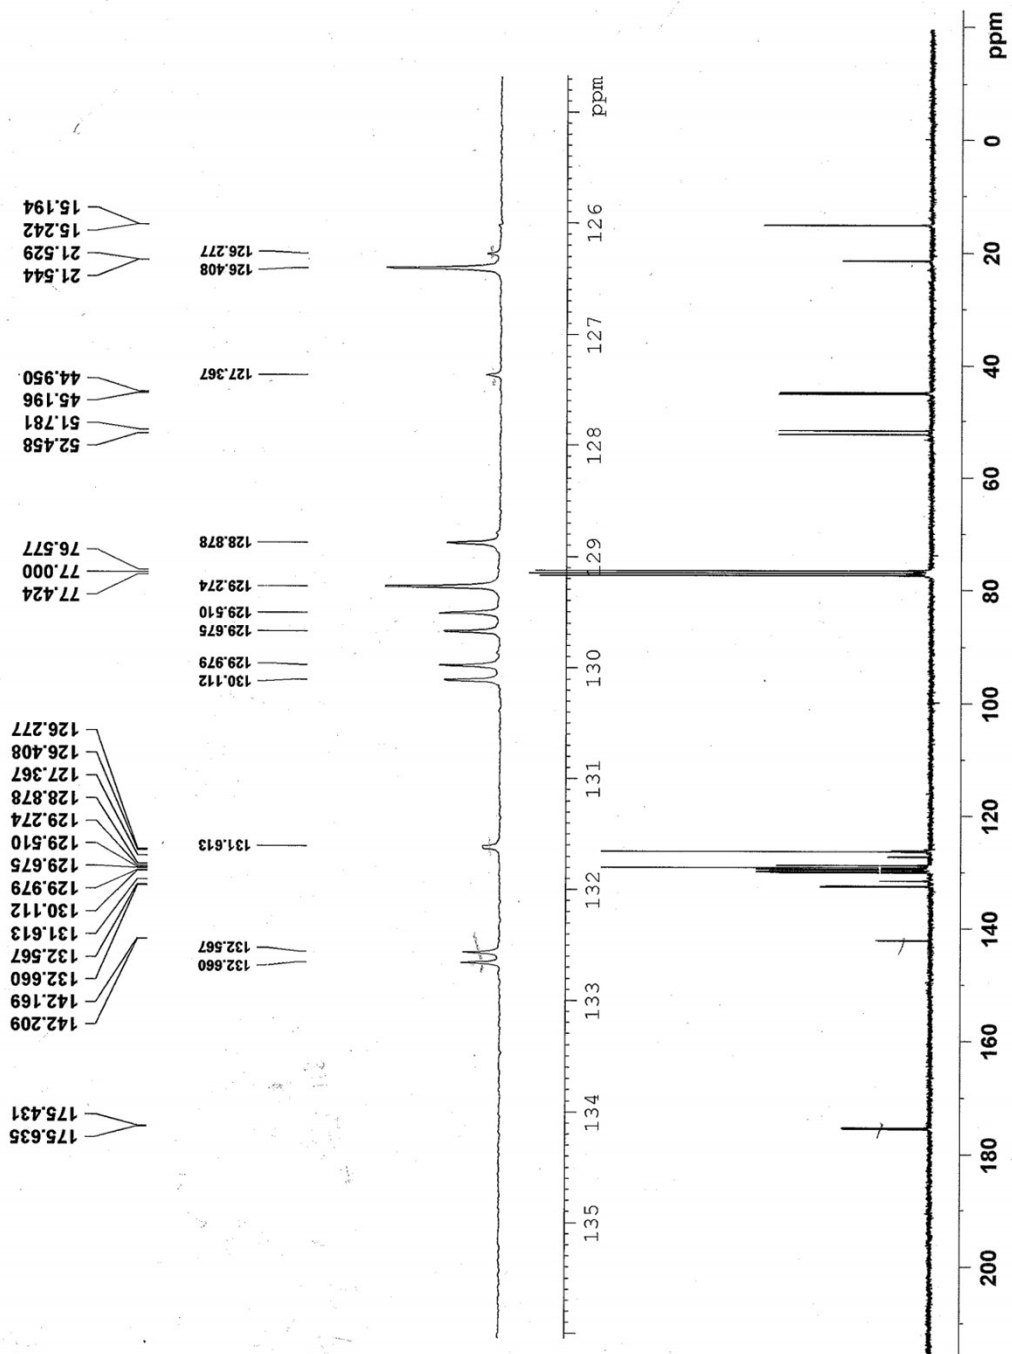

**13C NMR of Compound 1b**



CJK 089 P31CPD

92.820

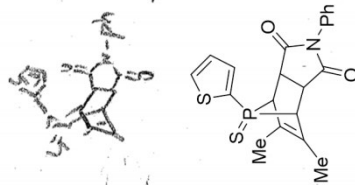

300 250 200 150 100 50 0 -50 -100 -150 -200 -250 -300 -350 -400 ppm

<sup>31</sup>P NMR of Compound 1c

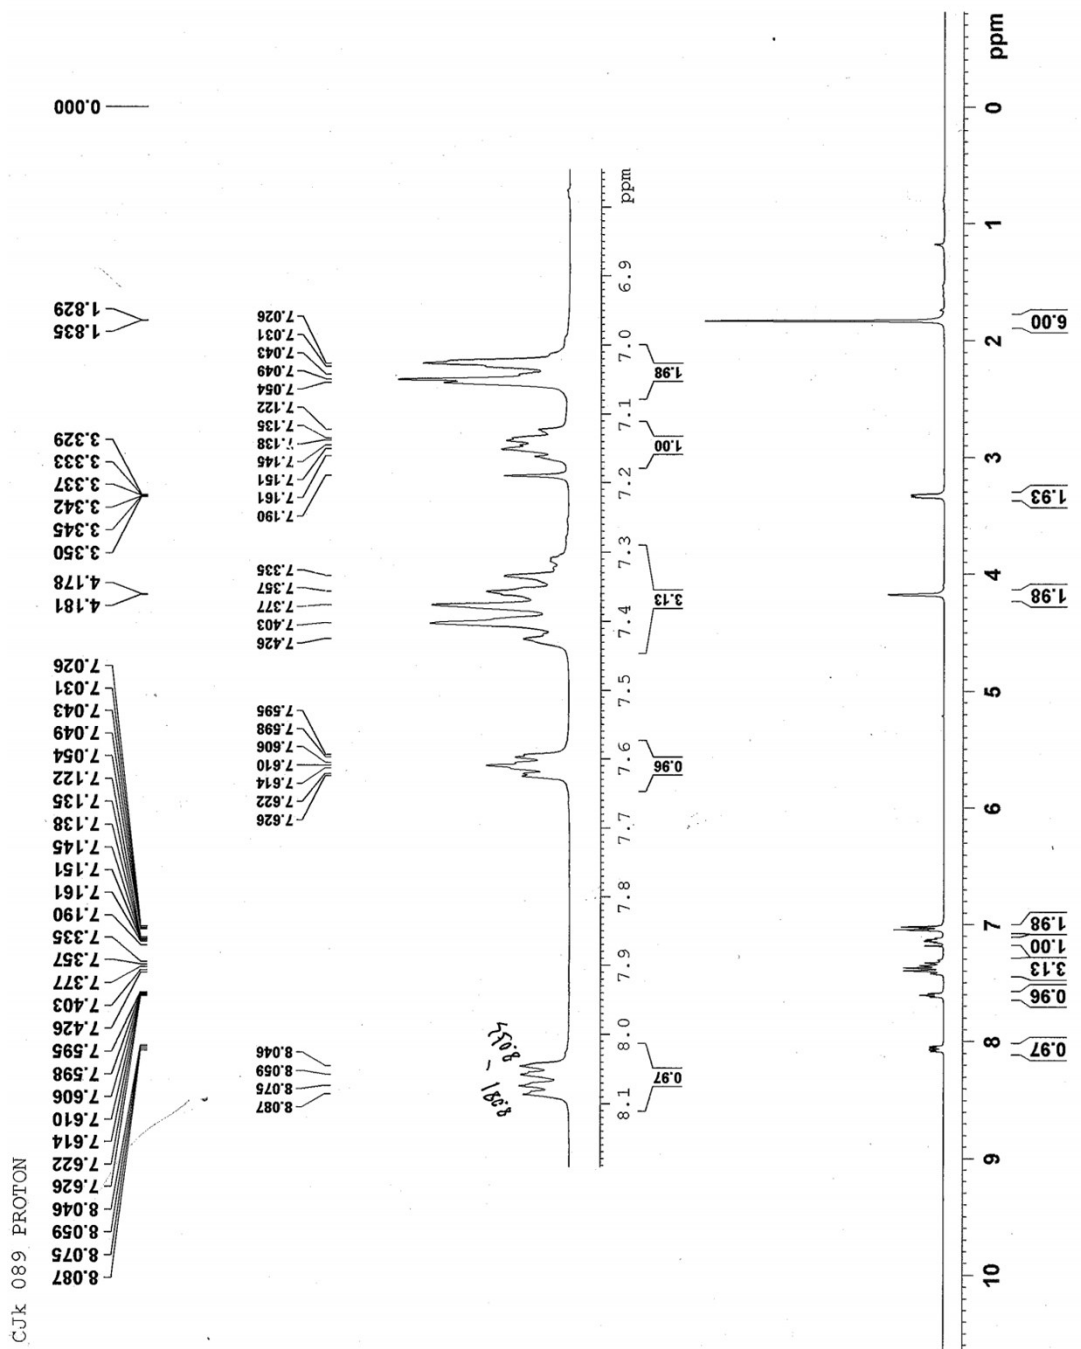

<sup>1</sup>H NMR of Compound 1c

CJK 089 C13CPD

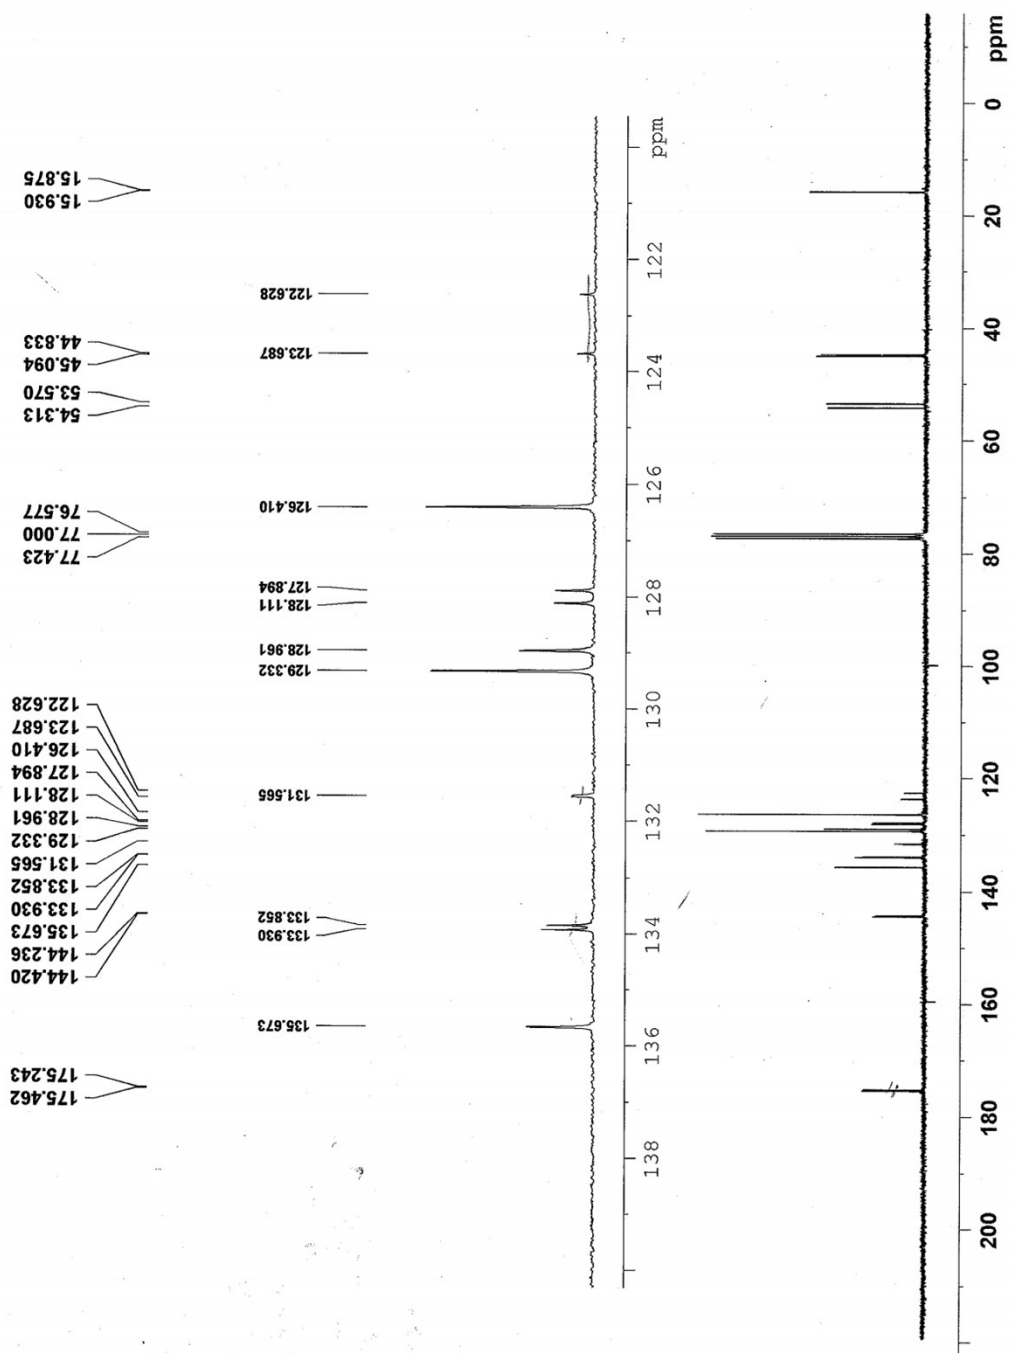

<sup>13</sup>C NMR of Compound 1c

3.1  
COK 31P FOLUFD

90.408

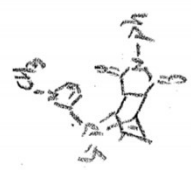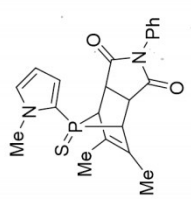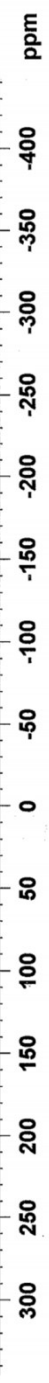

<sup>31</sup>P NMR of Compound 1d

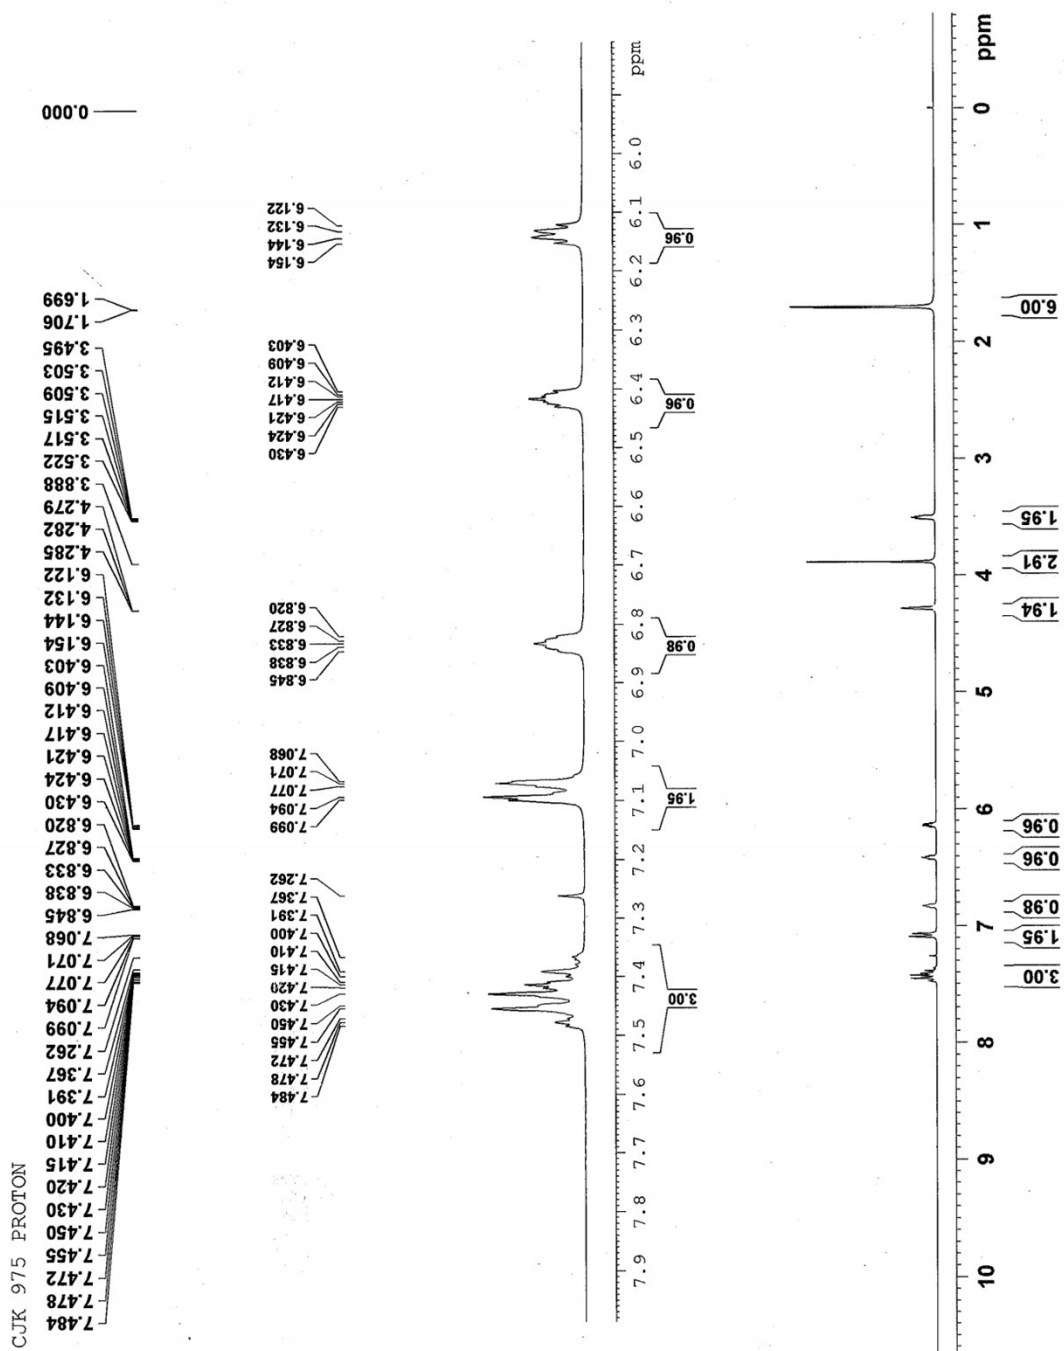

<sup>1</sup>H NMR of Compound 1d



CJK 960-50 P31CPD

25.468  
25.263  
25.048  
24.853

229.468  
229.251  
229.055  
228.853

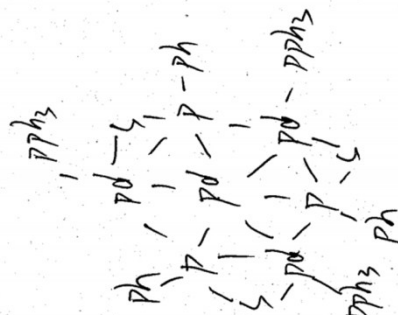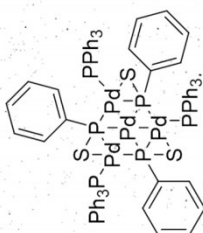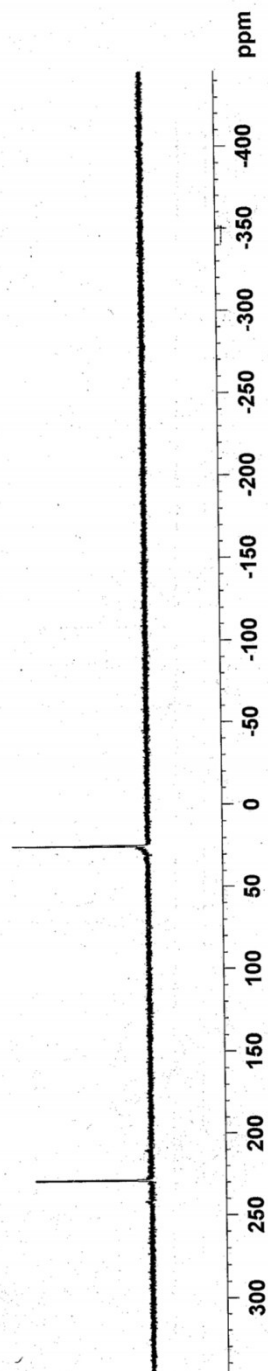

<sup>31</sup>P NMR of Compound 2a

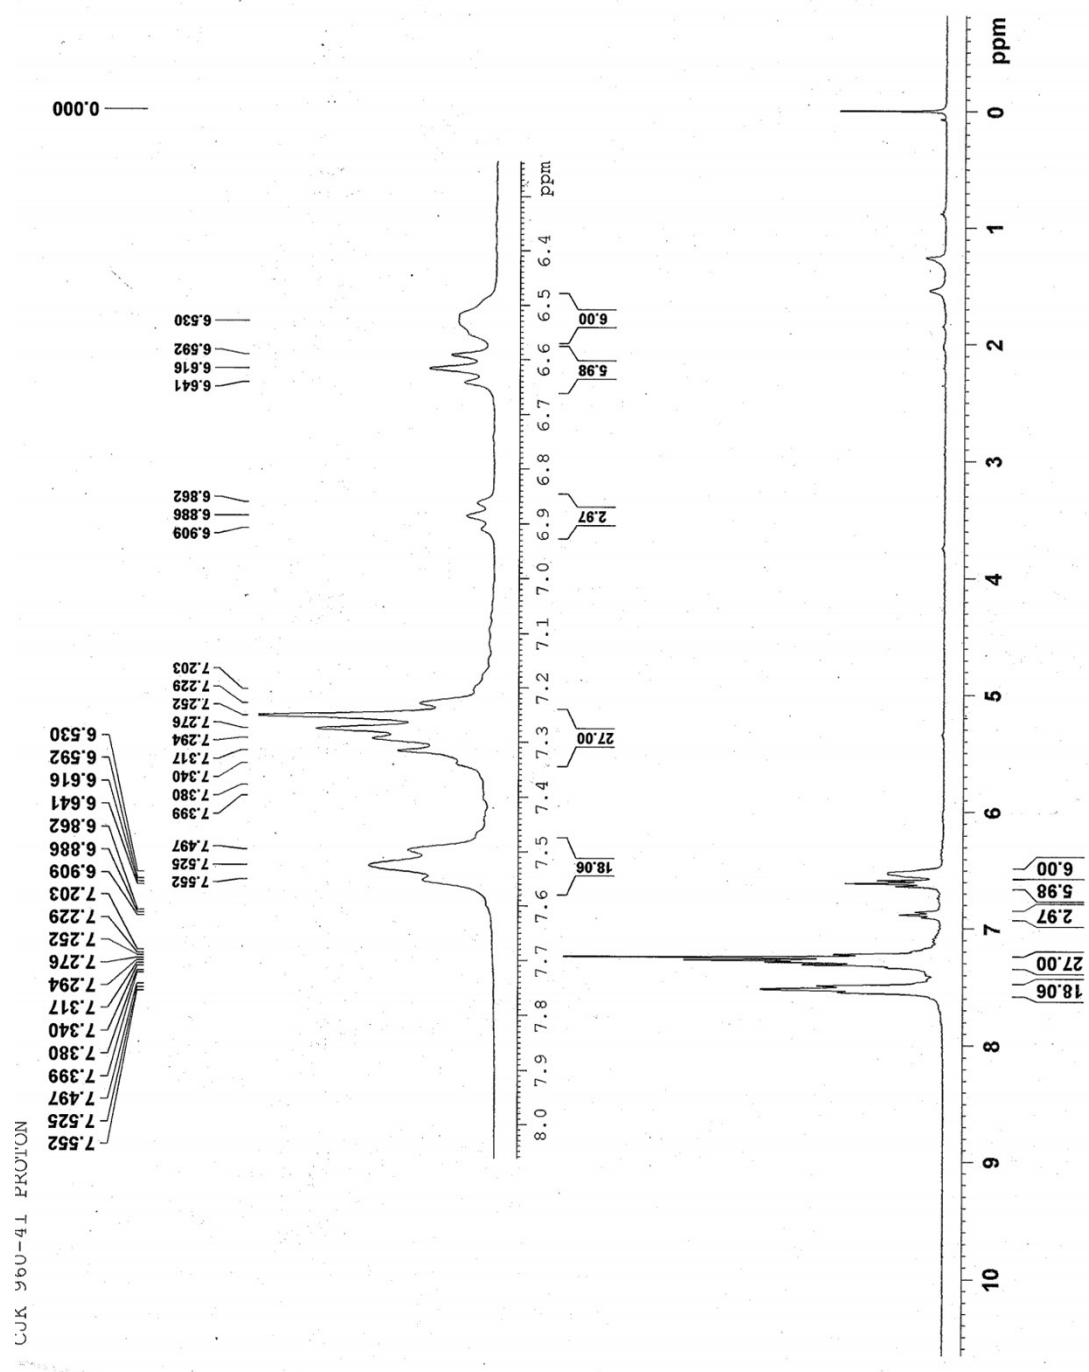

<sup>1</sup>H NMR of Compound 2a



C13CPD

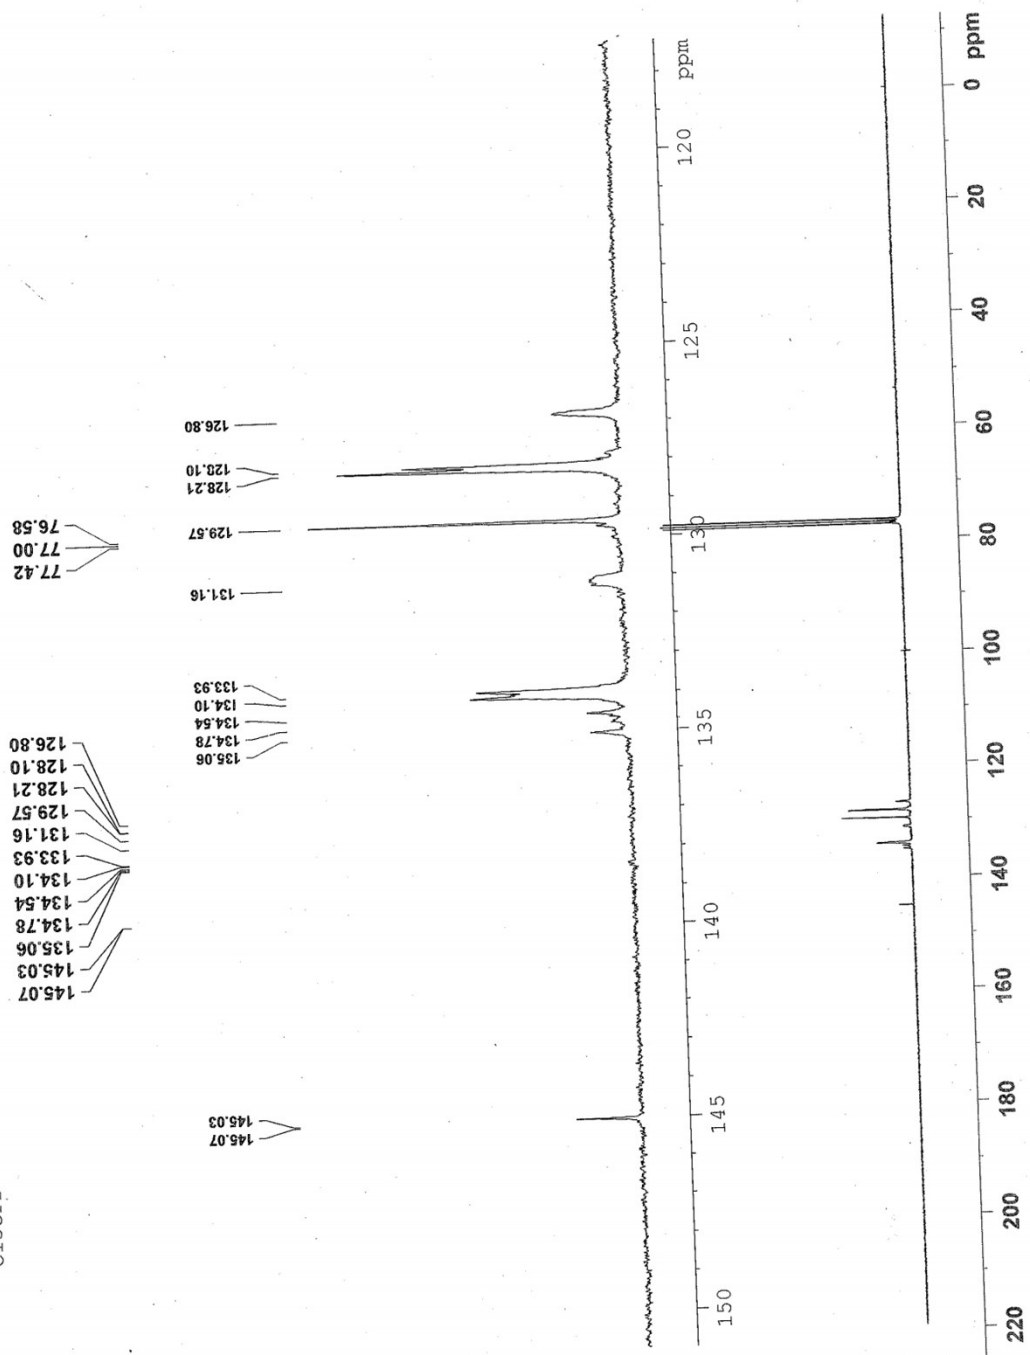

$^{13}\text{C}$  NMR of Compound 2a

CJK 959-1 P31CPD

25.169  
24.969  
24.742  
24.546

230.663  
230.443  
230.254  
230.040

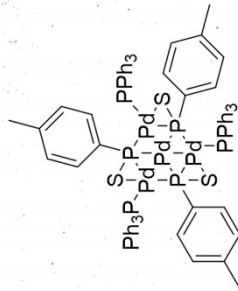

300 250 200 150 100 50 0 -50 -100 -150 -200 -250 -300 -350 -400 ppm

<sup>31</sup>P NMR of Compound 2b

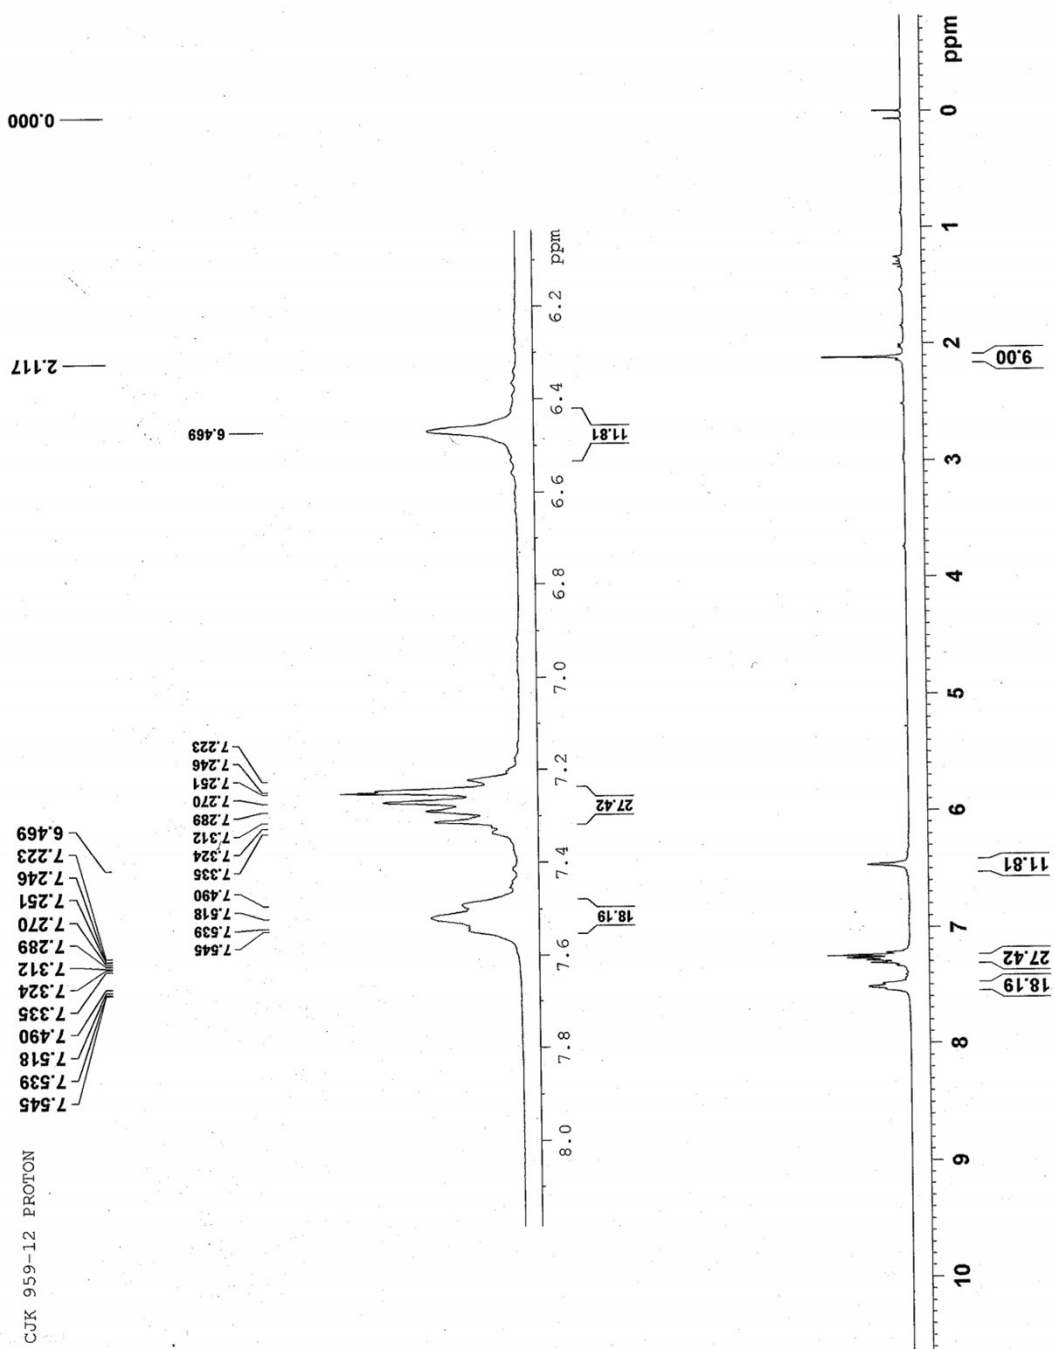

<sup>1</sup>H NMR of Compound 2b

CJK 959-14 C13CPD

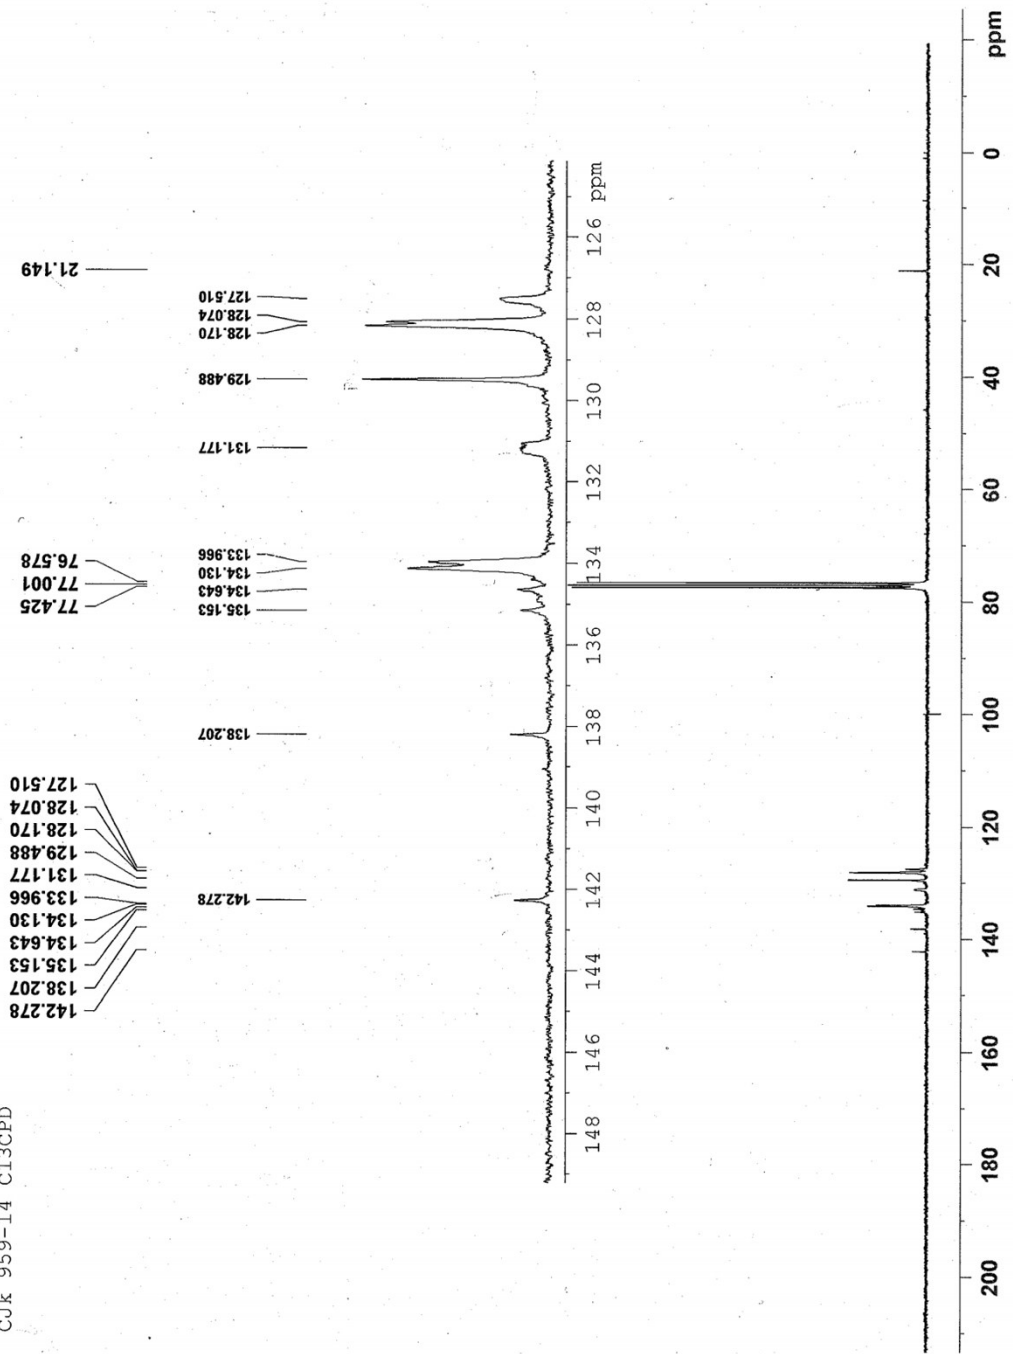

<sup>13</sup>C NMR of Compound 2b

P31CPD

207.087  
206.884  
206.676  
206.465

25.464  
25.264  
25.044  
24.841

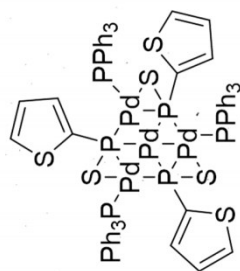

$^{31}\text{P}$  NMR of Compound 2c

ppm

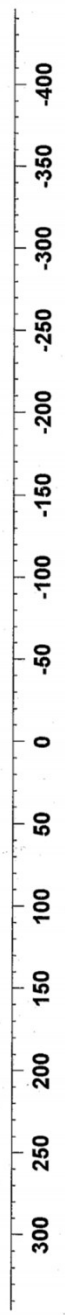

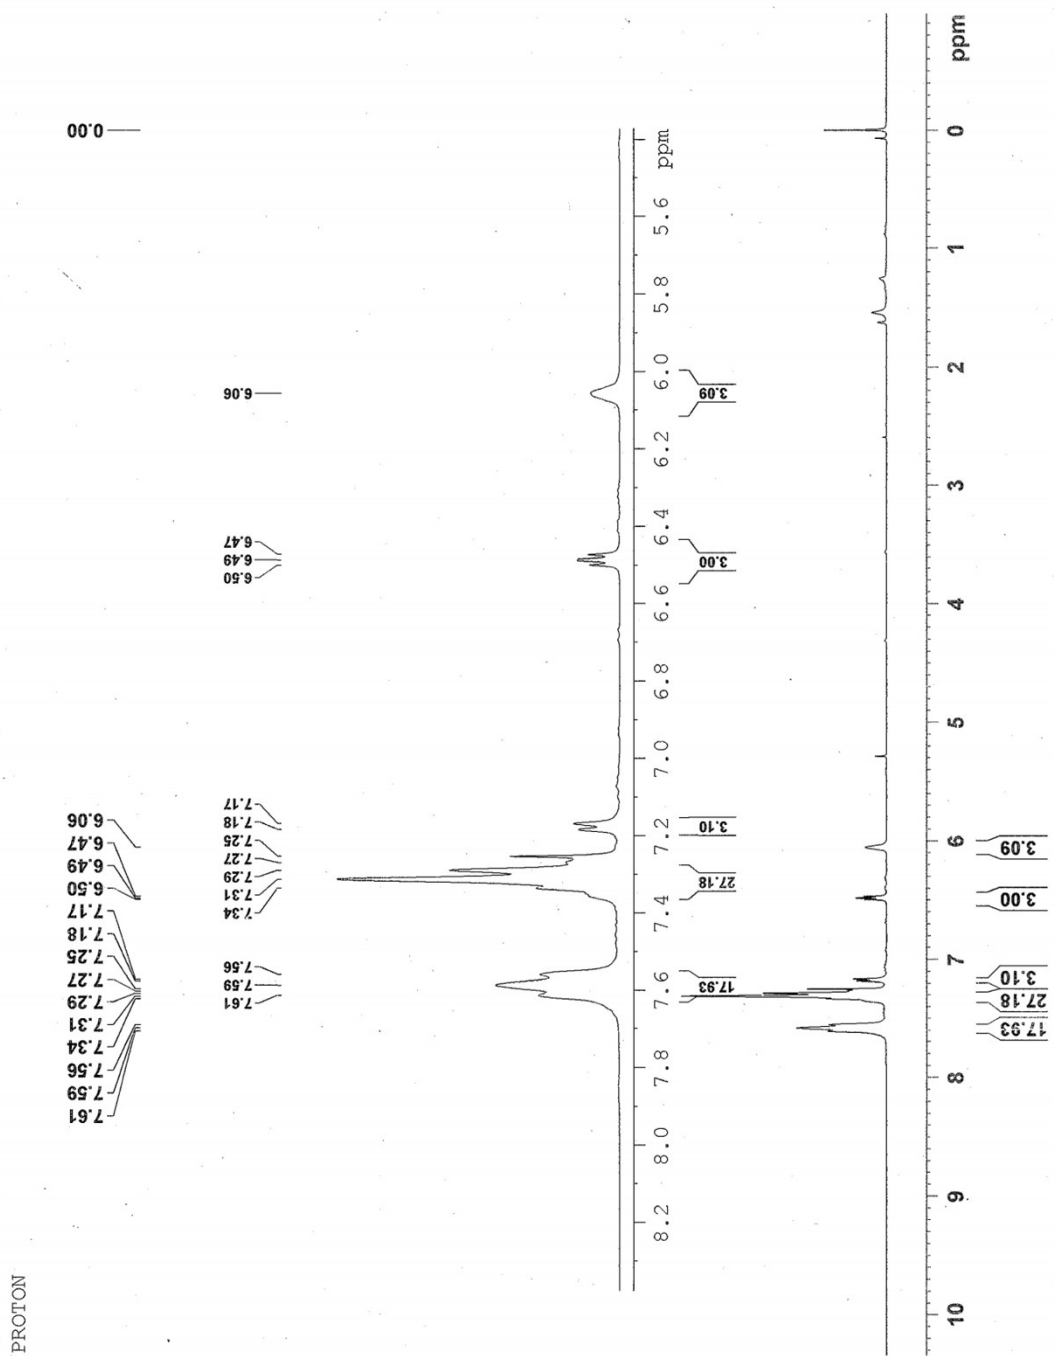

$^1\text{H}$  NMR of Compound 2c

C13CPD

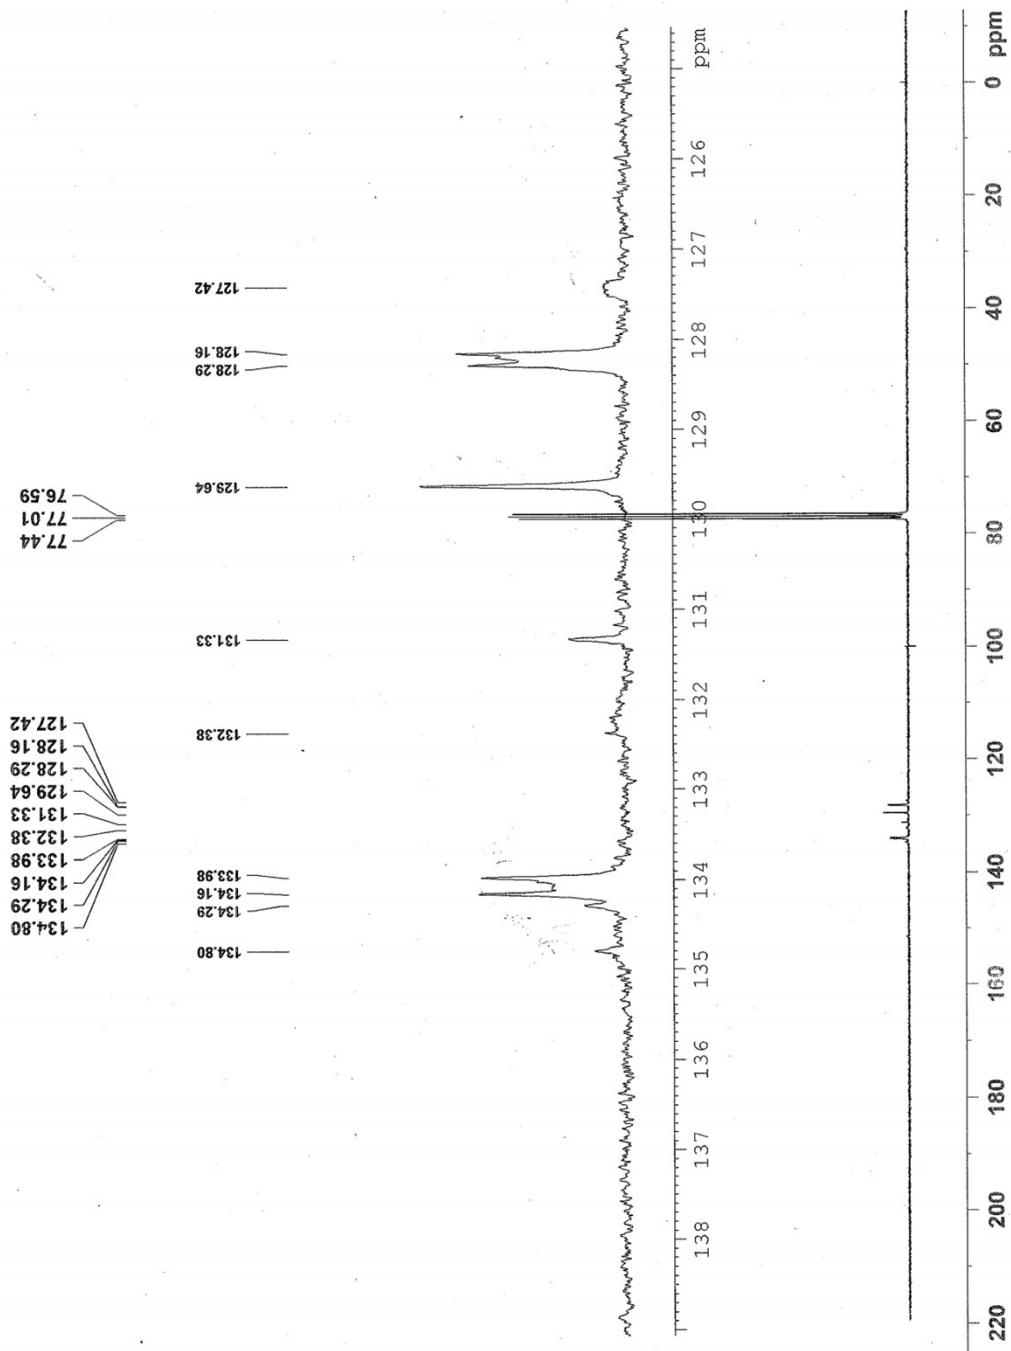

$^{13}\text{C}$  NMR of Compound 2c

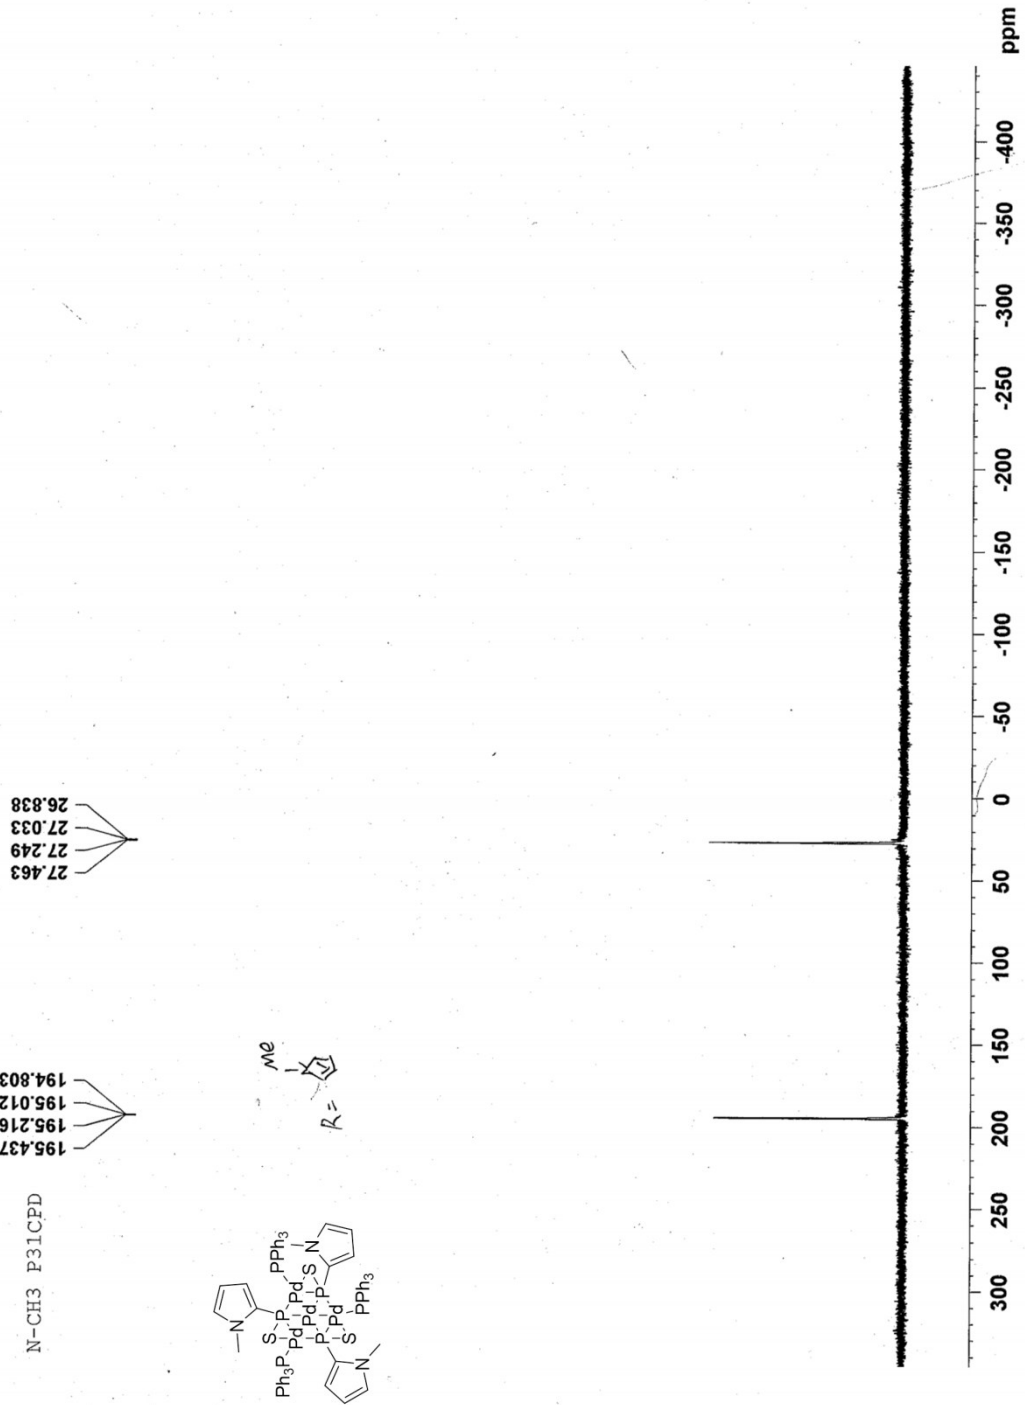

<sup>31</sup>P NMR of Compound 2d



PROTON

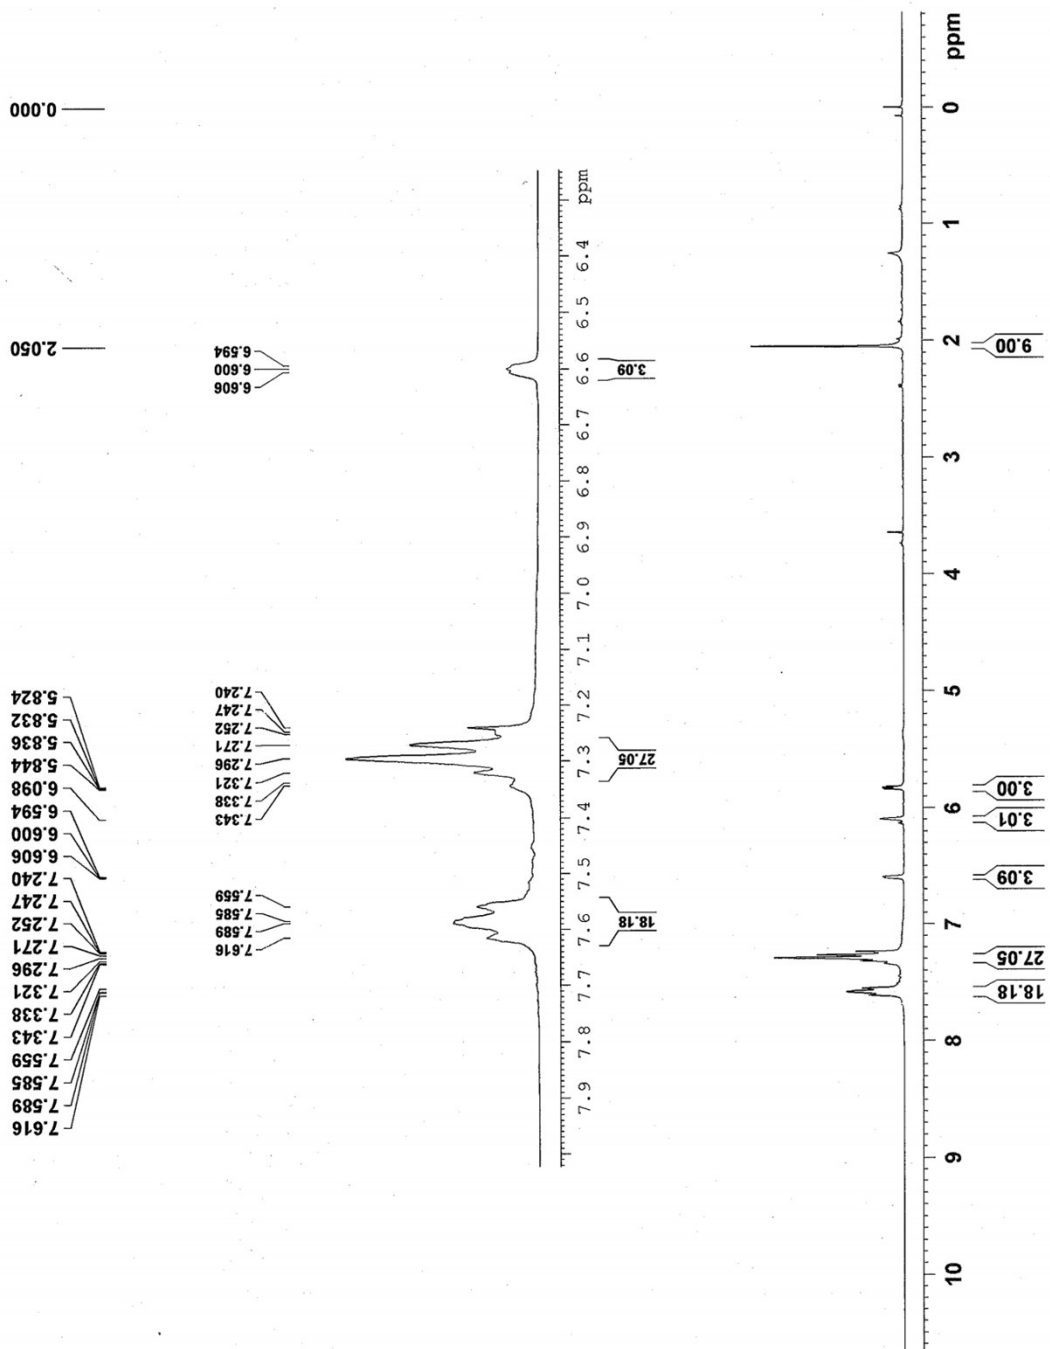

<sup>1</sup>H NMR of Compound 2d

C13CPD

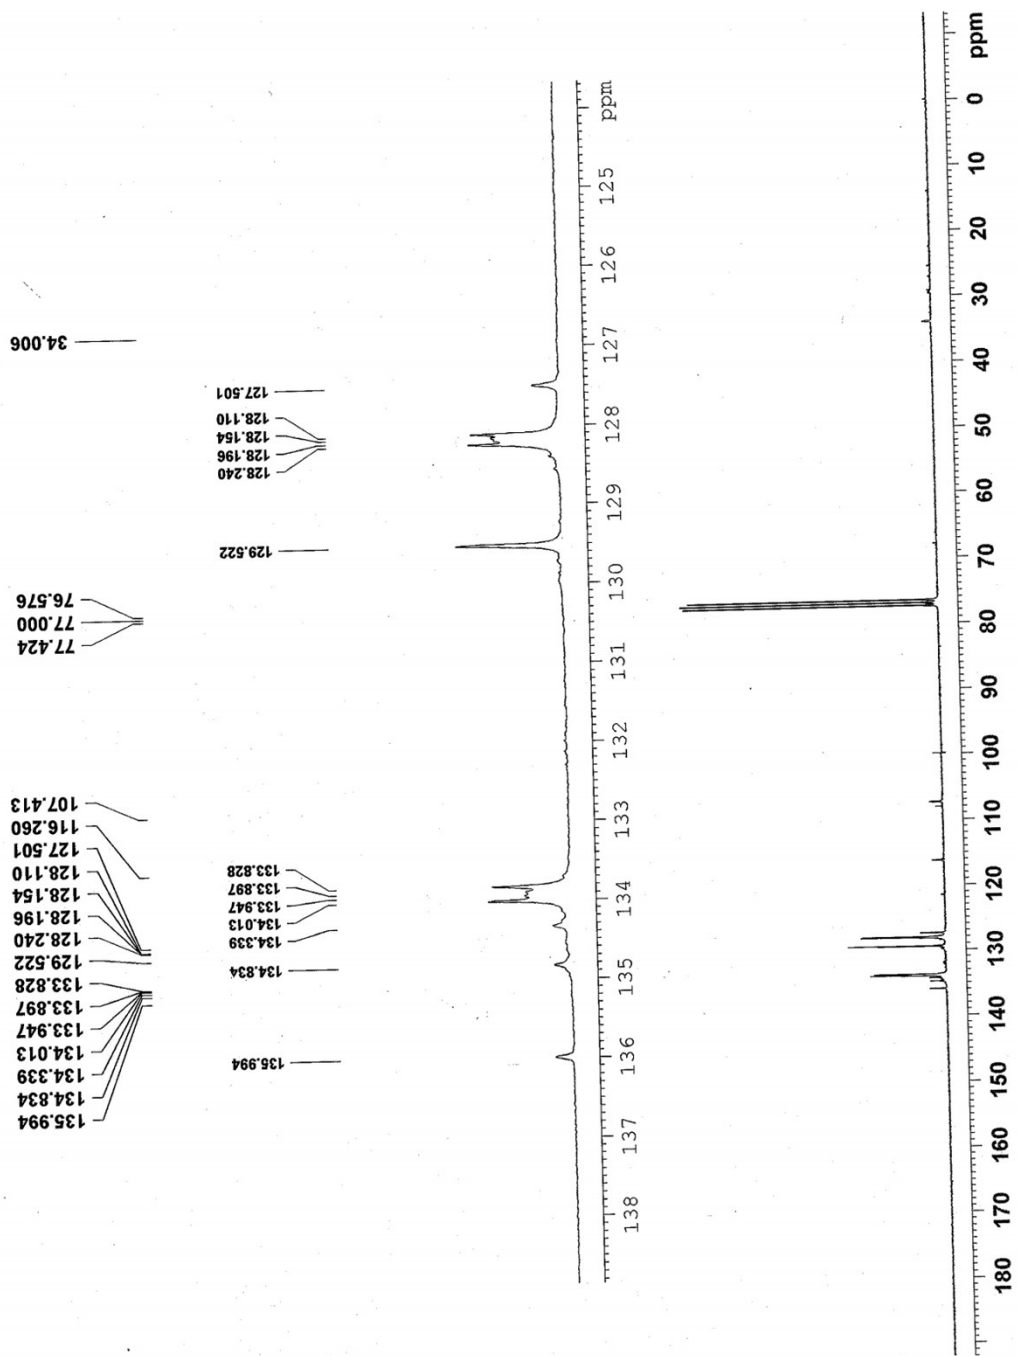

<sup>13</sup>C NMR of Compound 2d

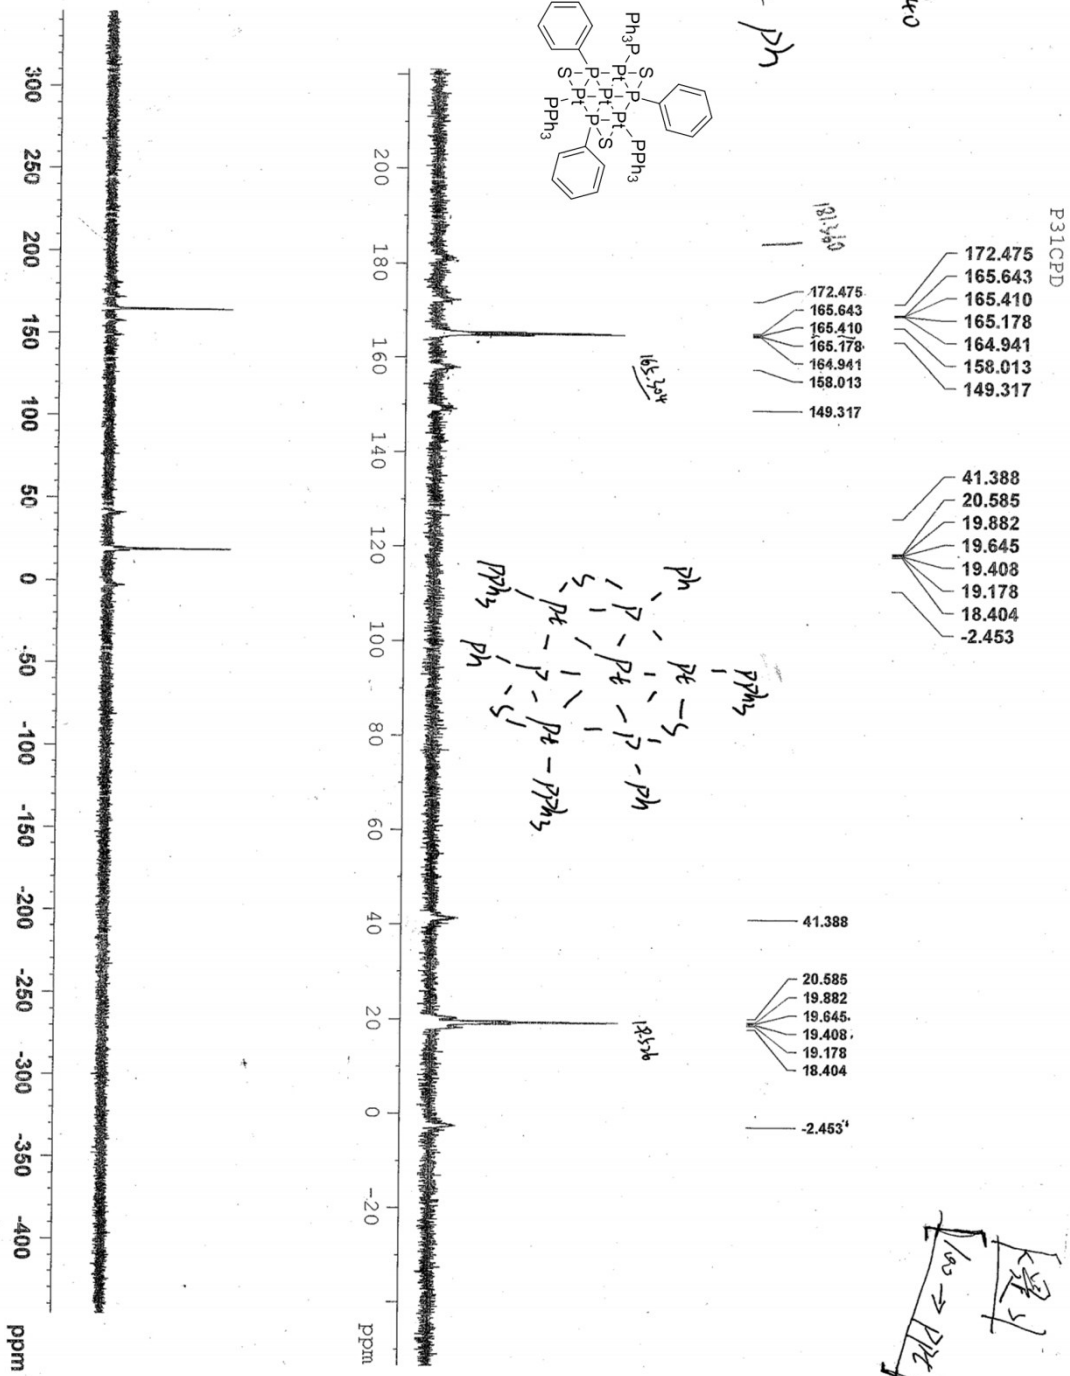

**<sup>31</sup>P NMR of Compound 4a**

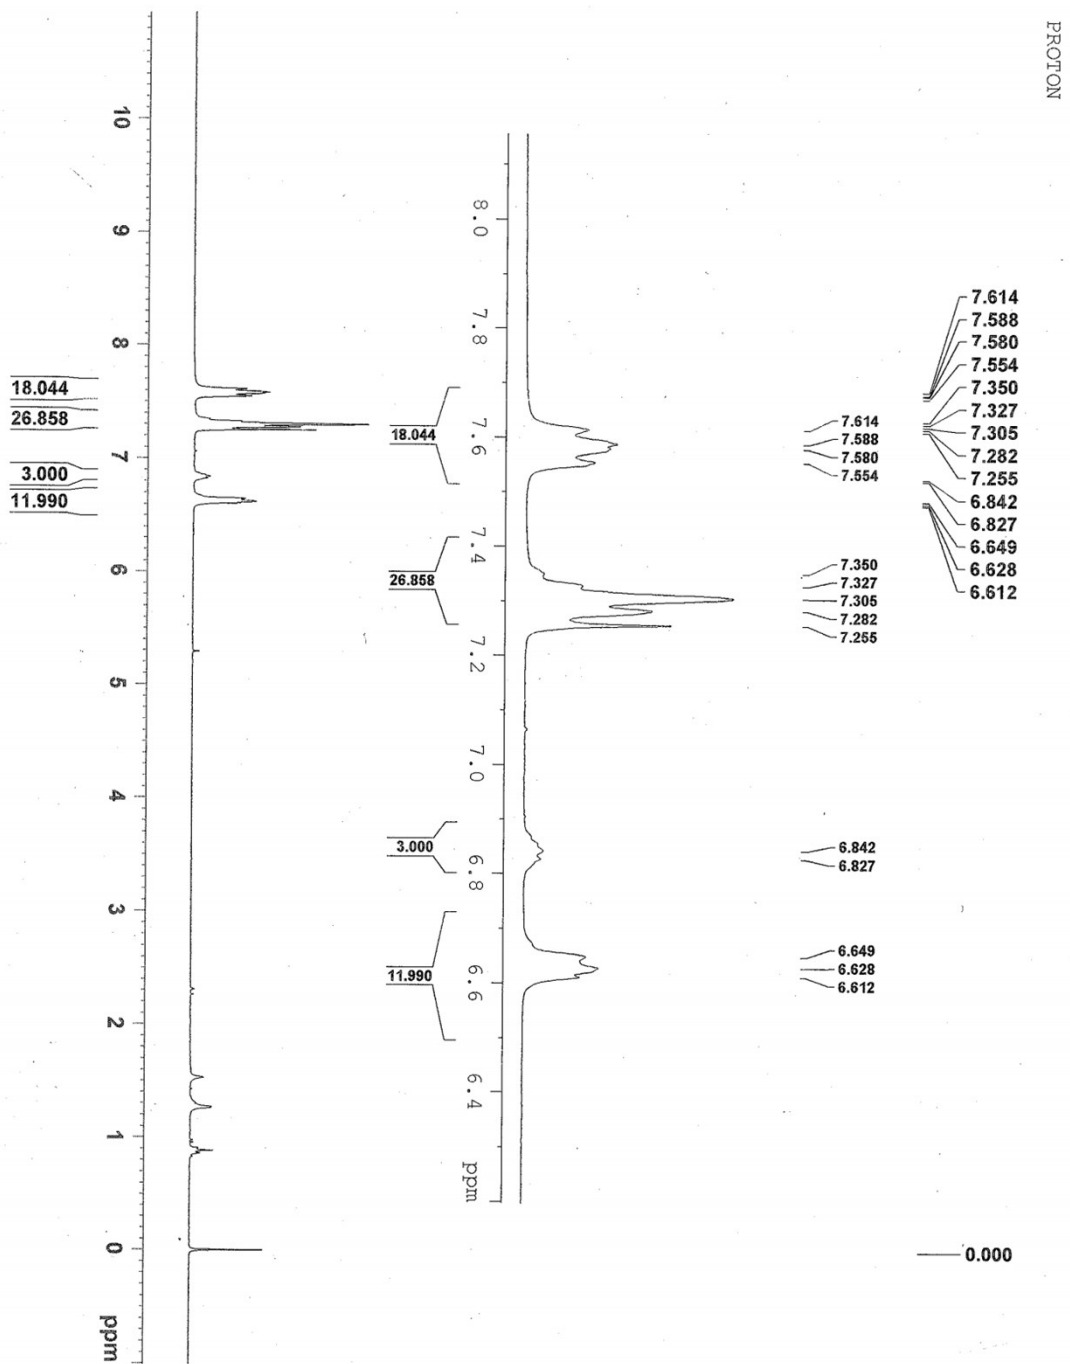

<sup>1</sup>H NMR of Compound 4a

C13CPD

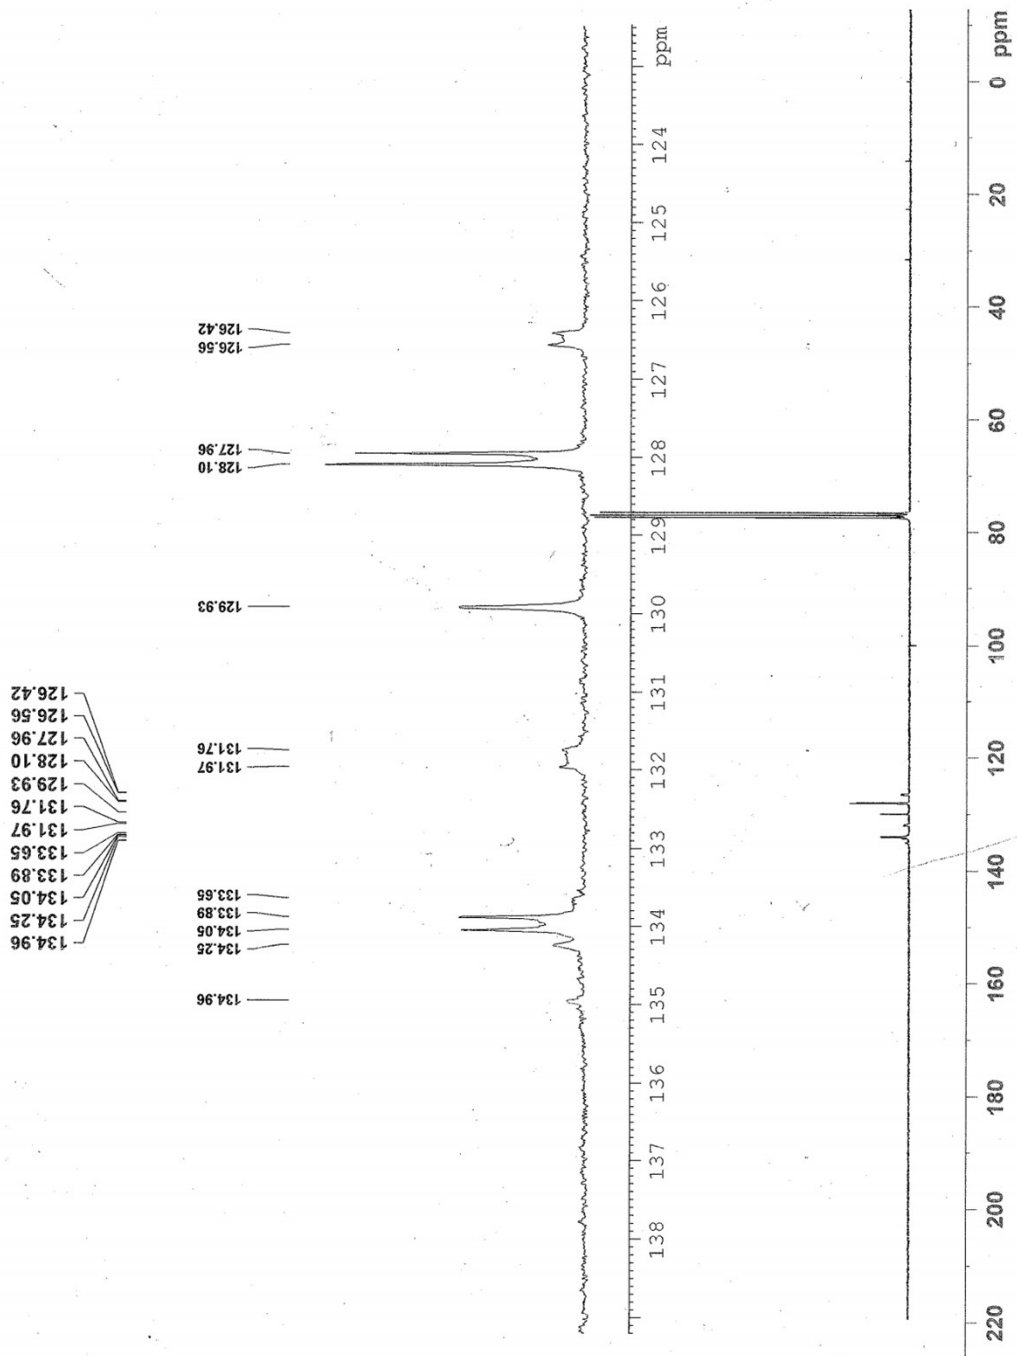

<sup>13</sup>C NMR of Compound 4a

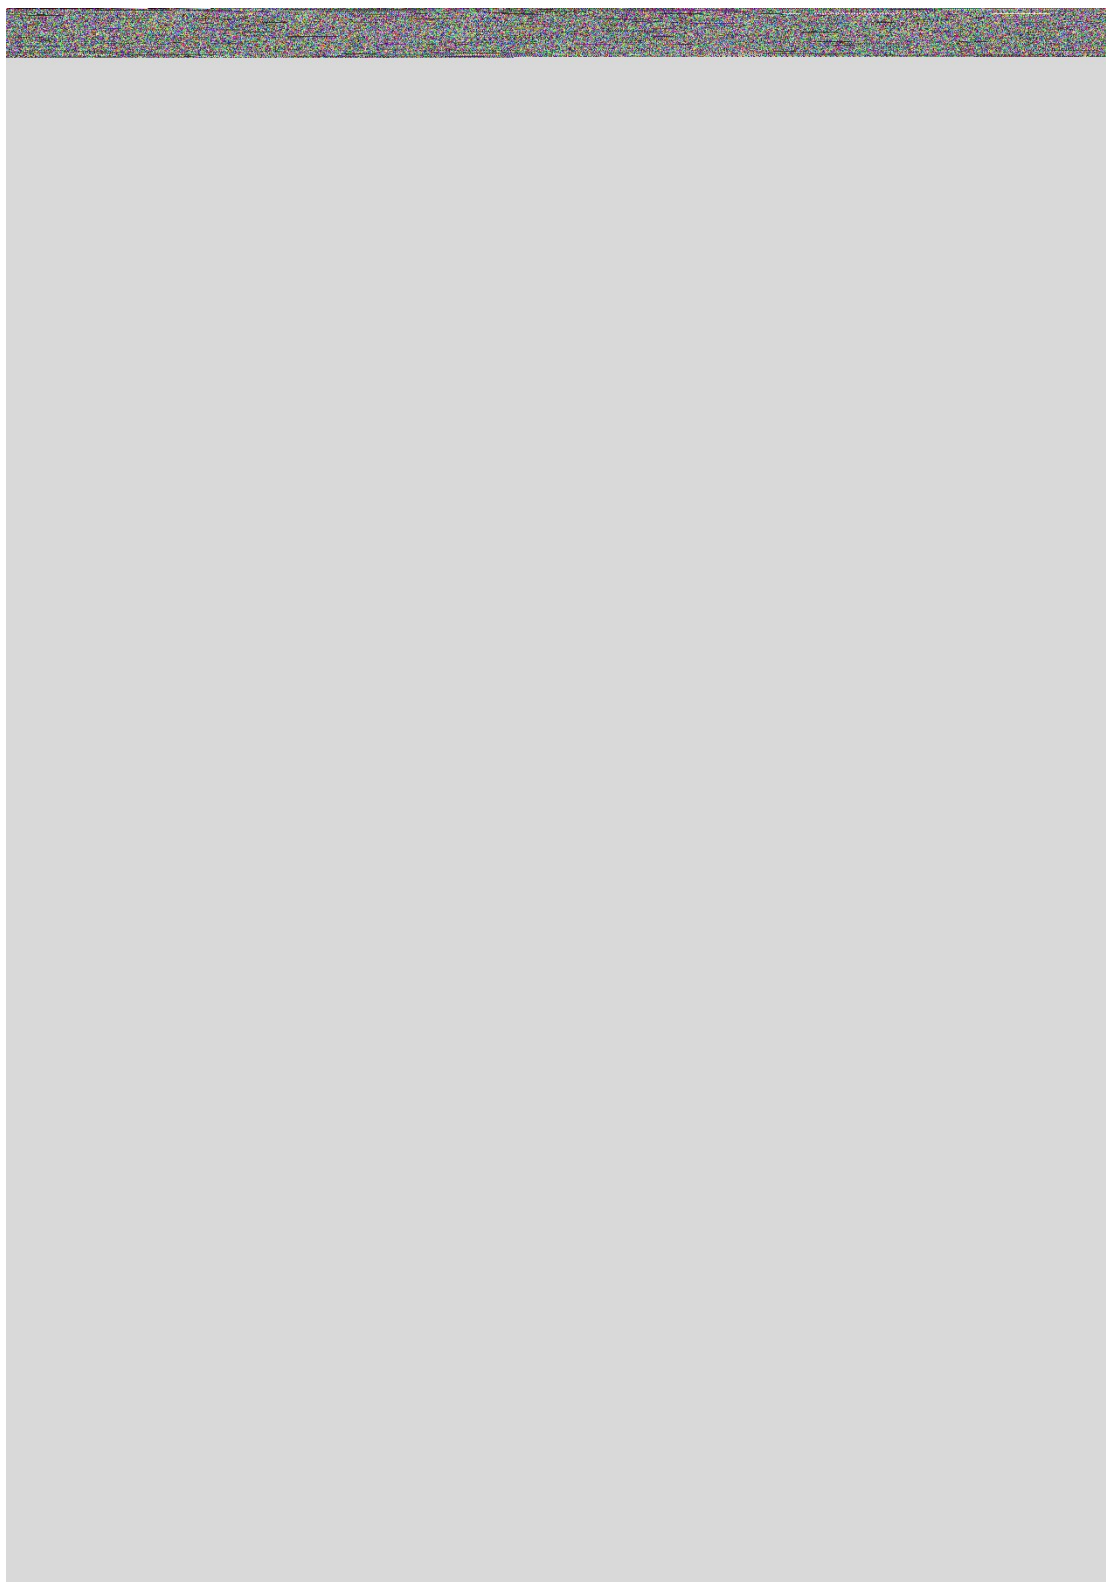

**$^1\text{H}$  NMR of Compound 1c**

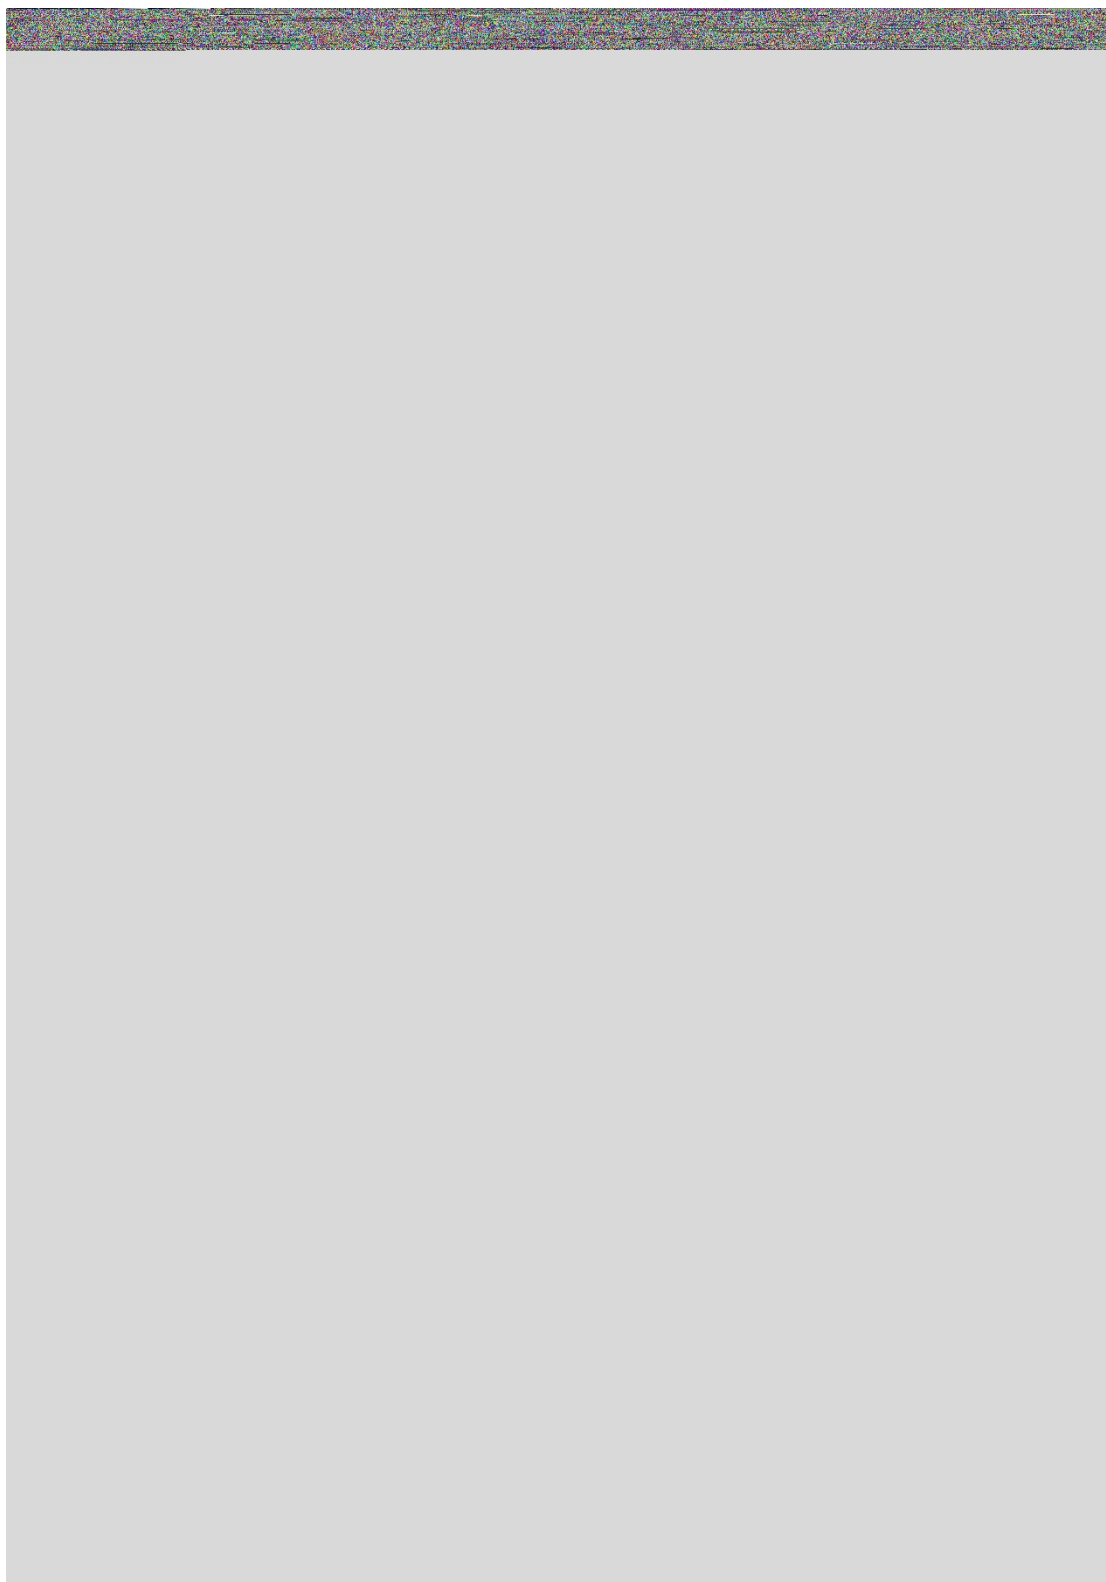

**$^{13}\text{C}$  NMR of Compound 1c**

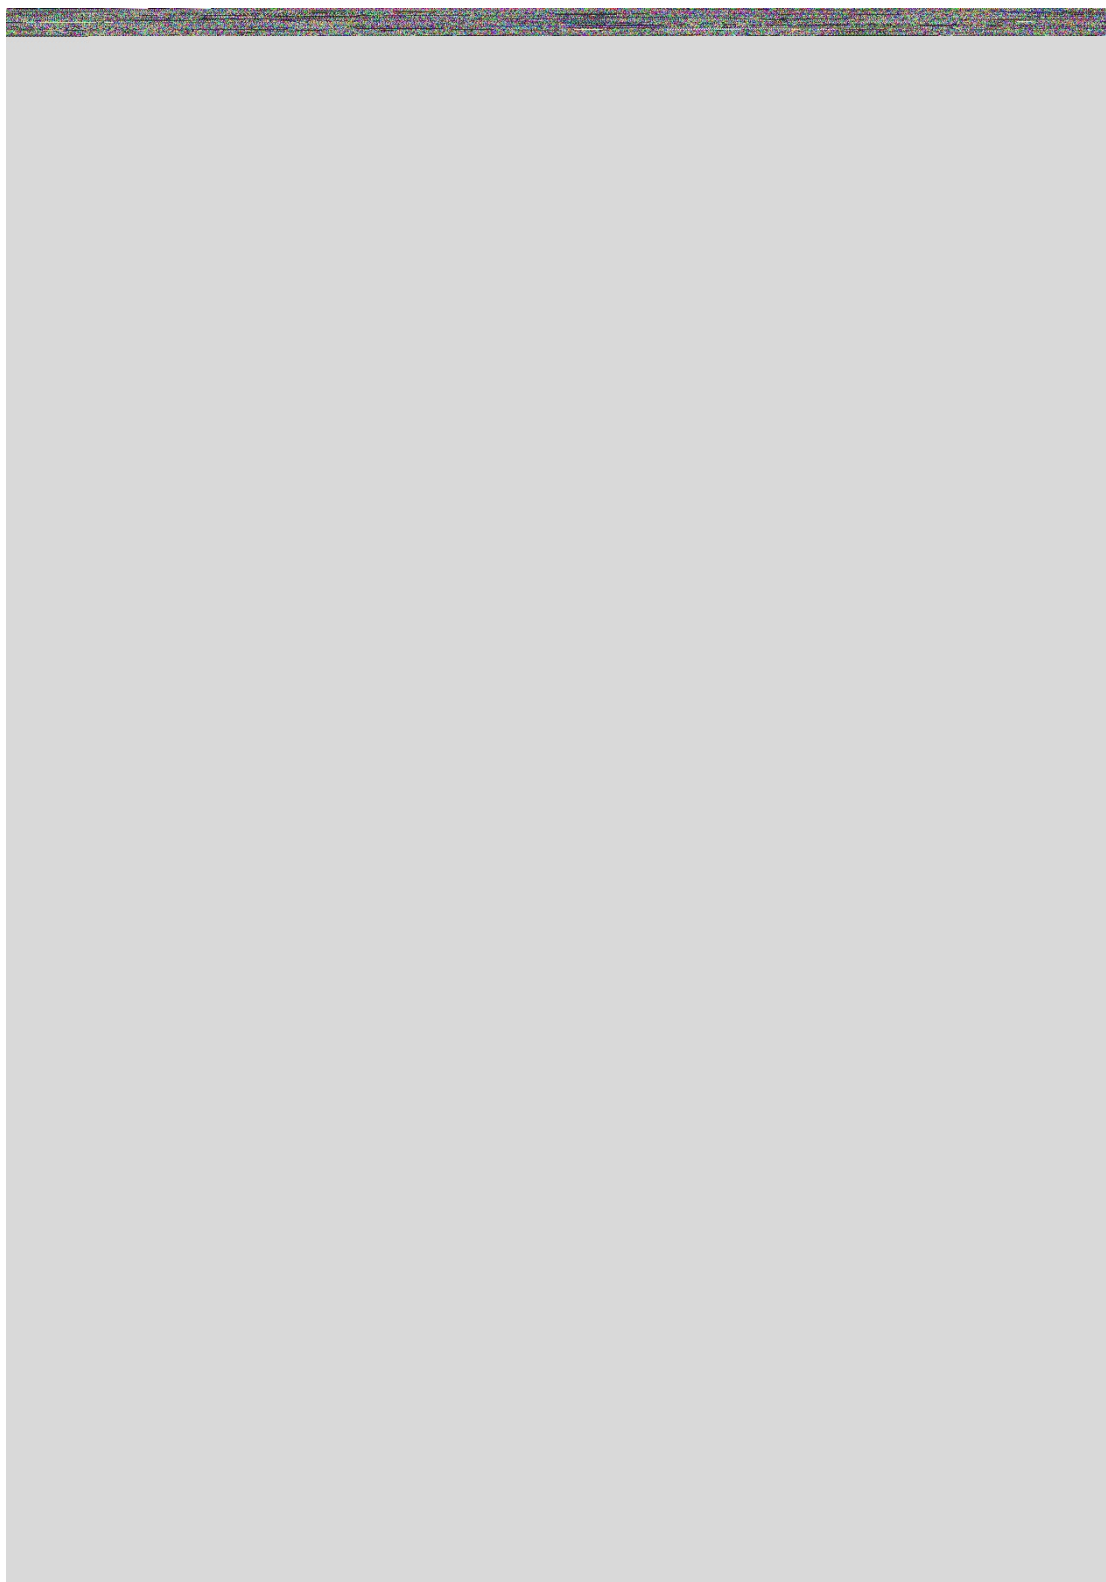

**<sup>31</sup>P NMR of Compound 1d**



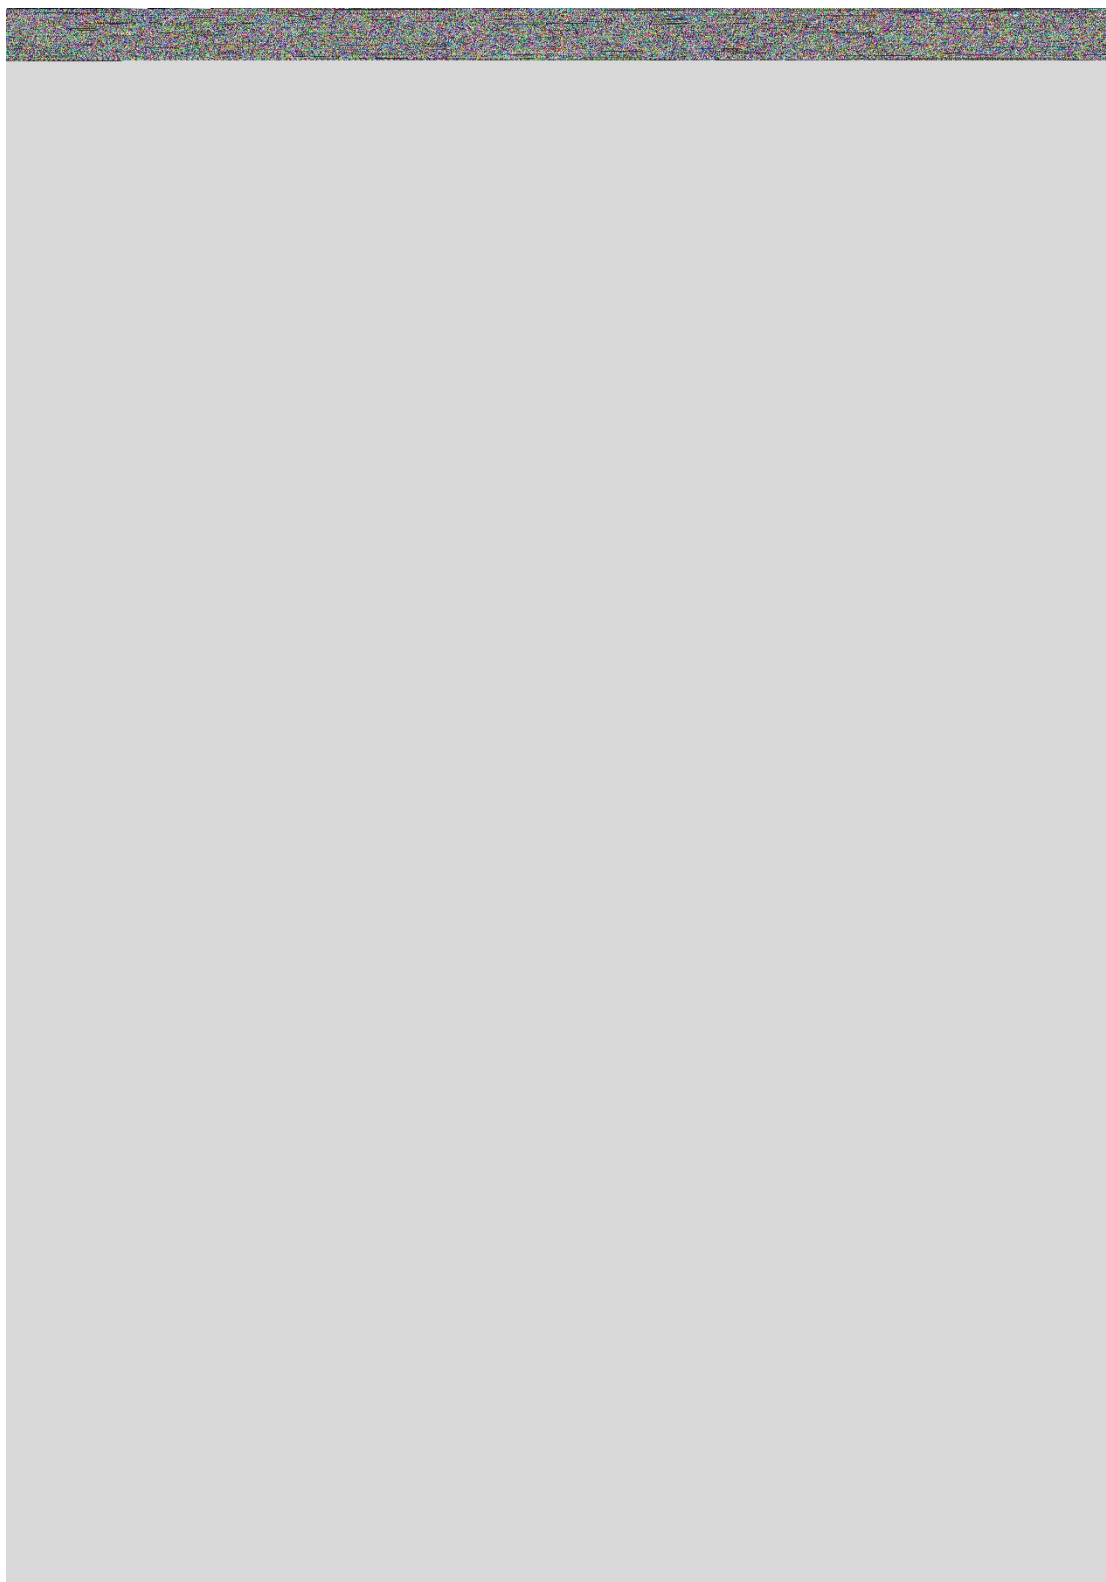

**$^1\text{H}$  NMR of Compound 1d**

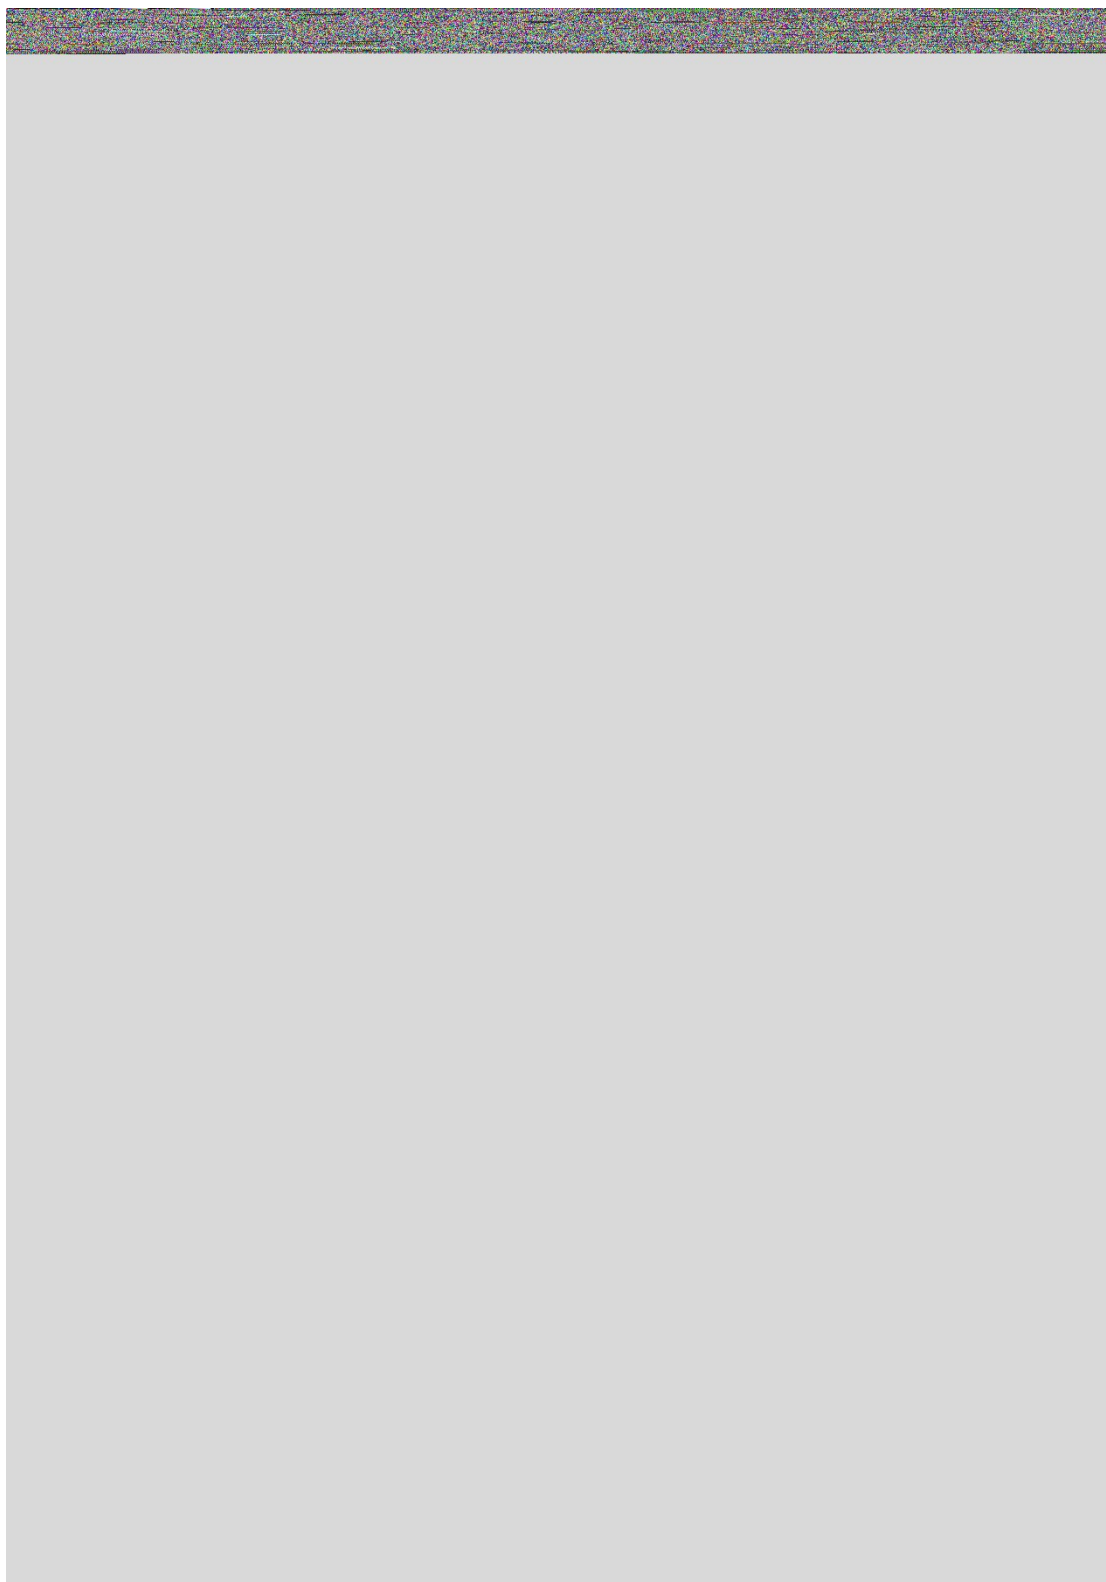

**$^{13}\text{C}$  NMR of Compound 1d**

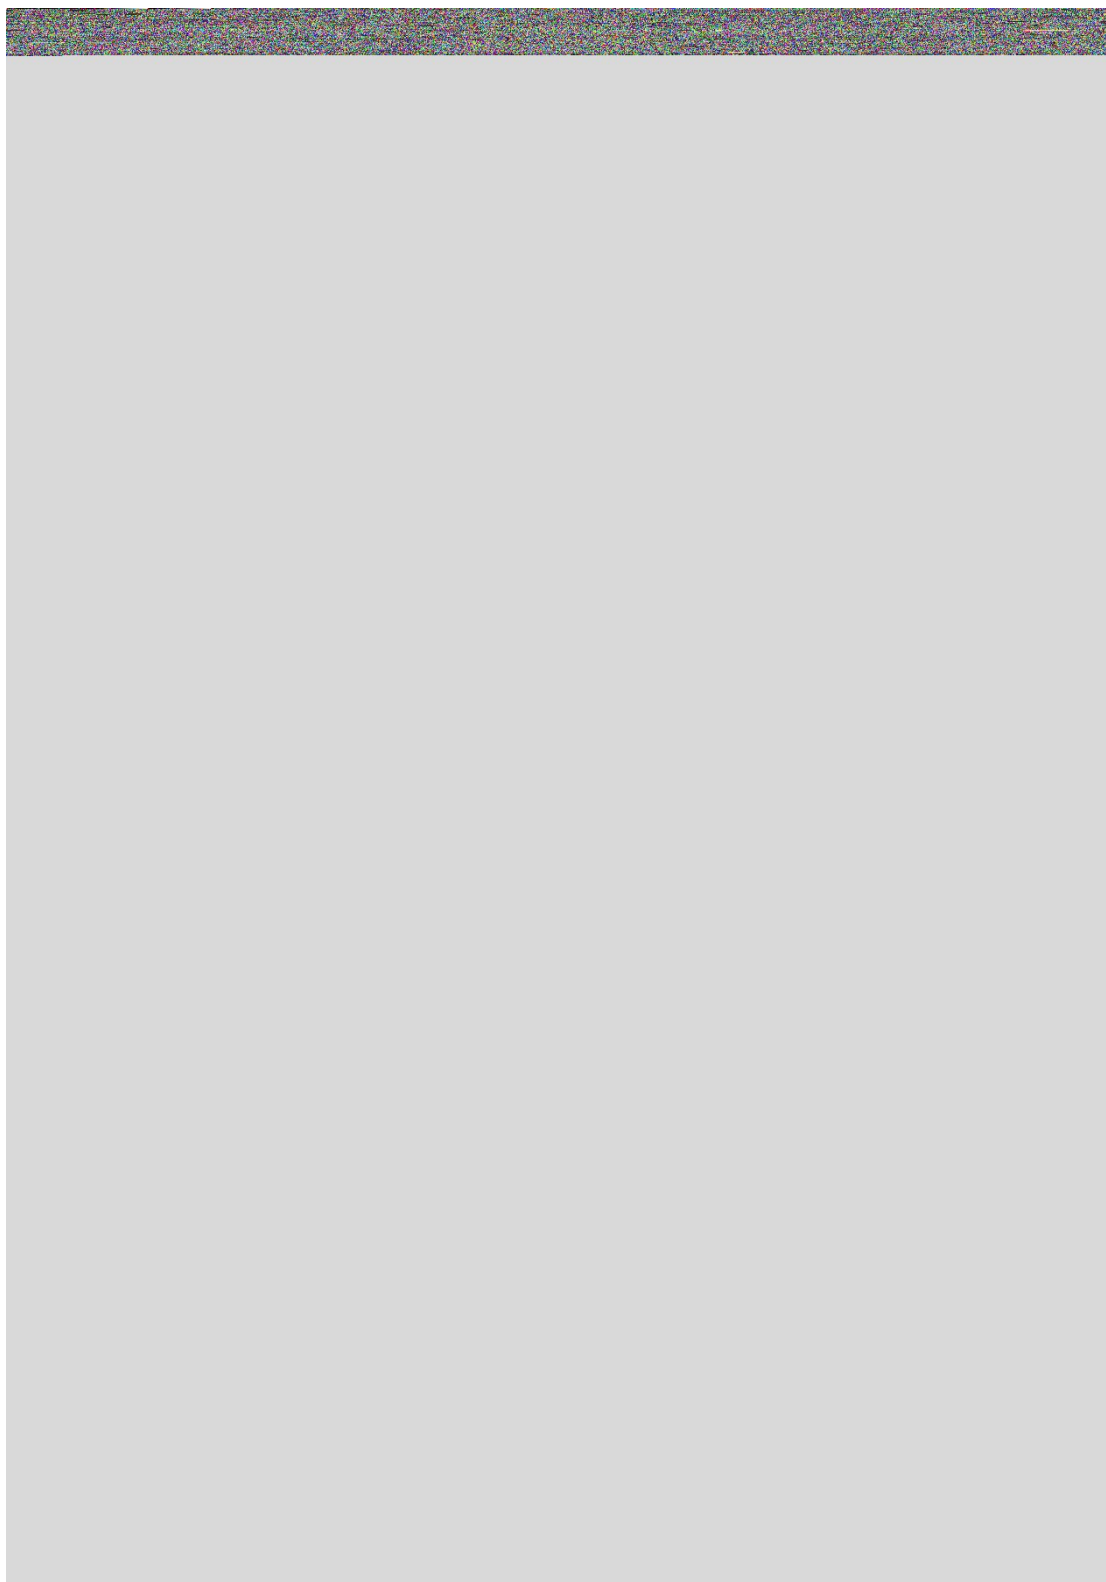

**$^{31}\text{P}$  NMR of Compound 2a**

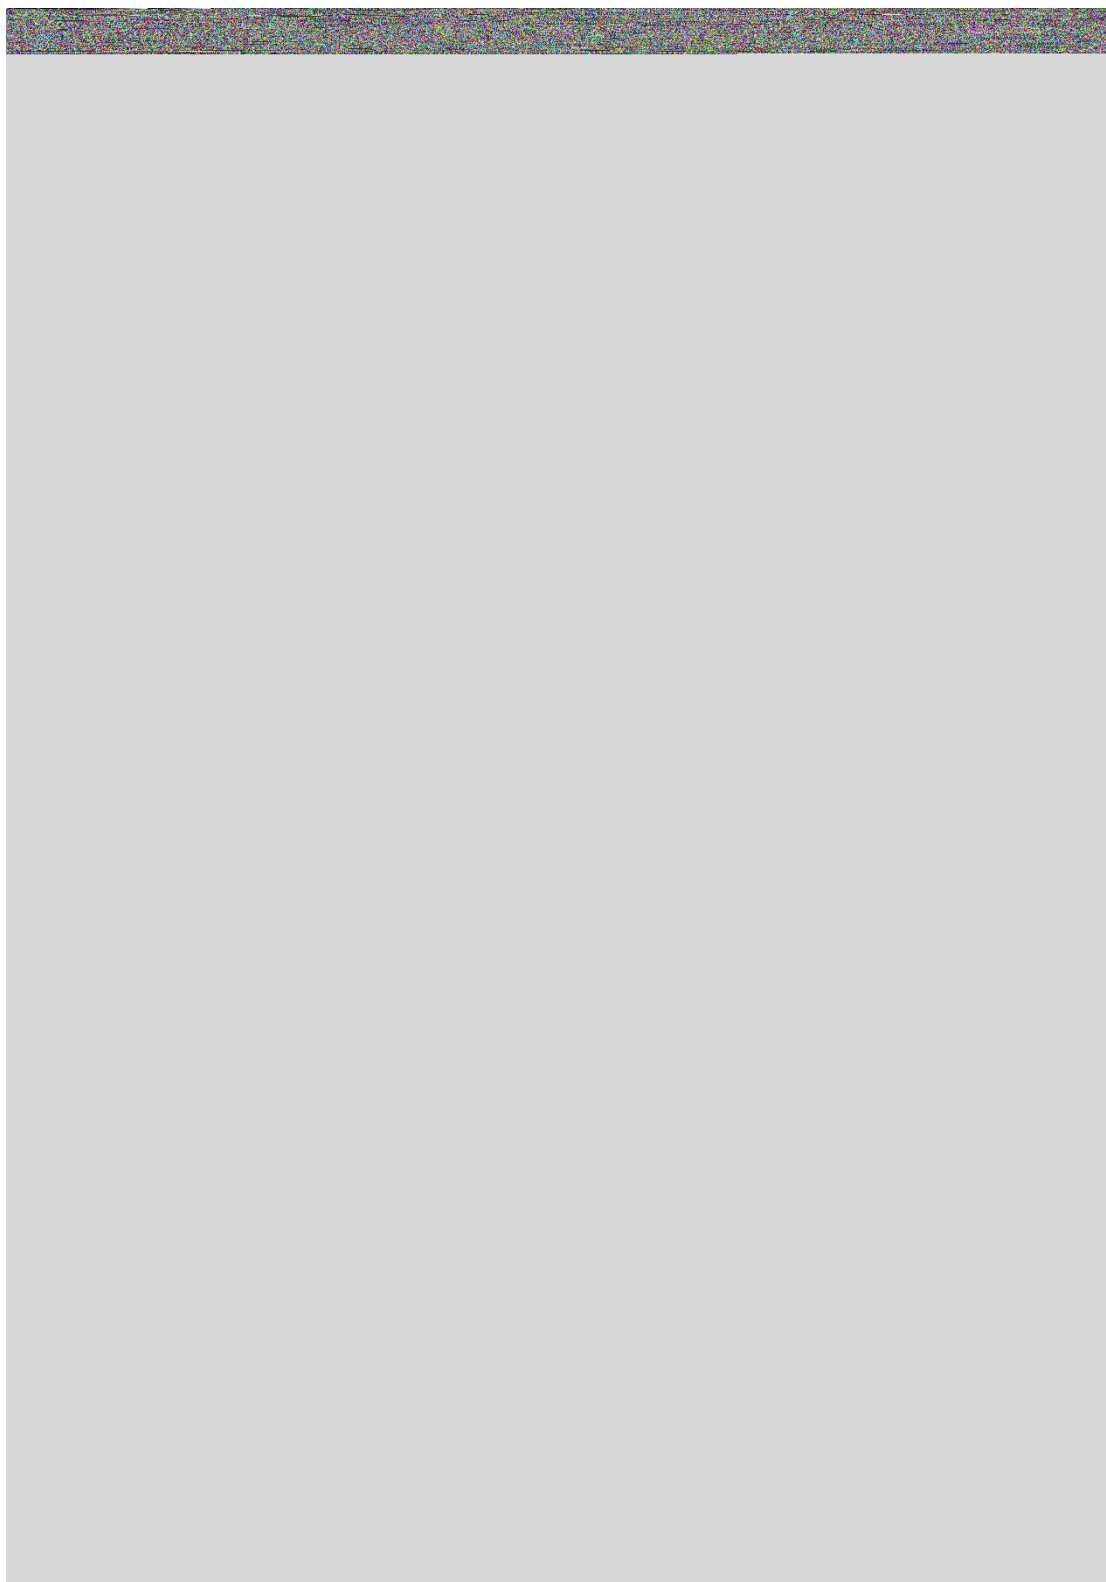

**$^1\text{H}$  NMR of Compound 2a**

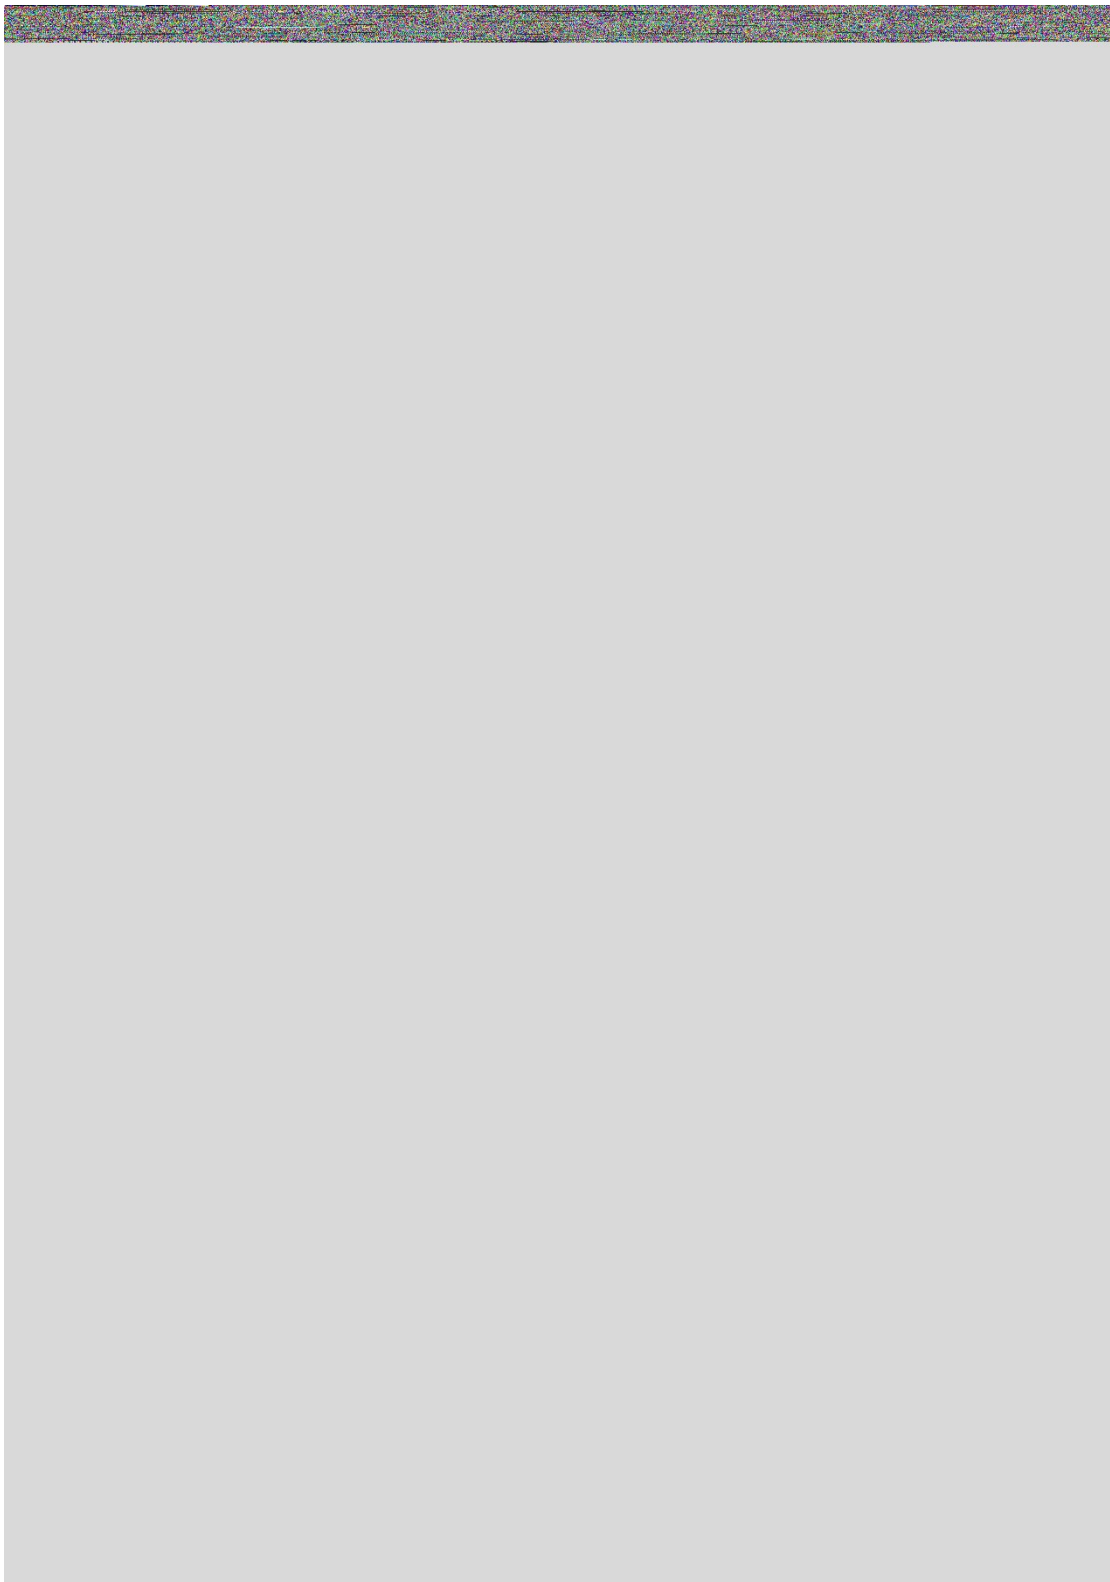

**$^{13}\text{C}$  NMR of Compound 2a**

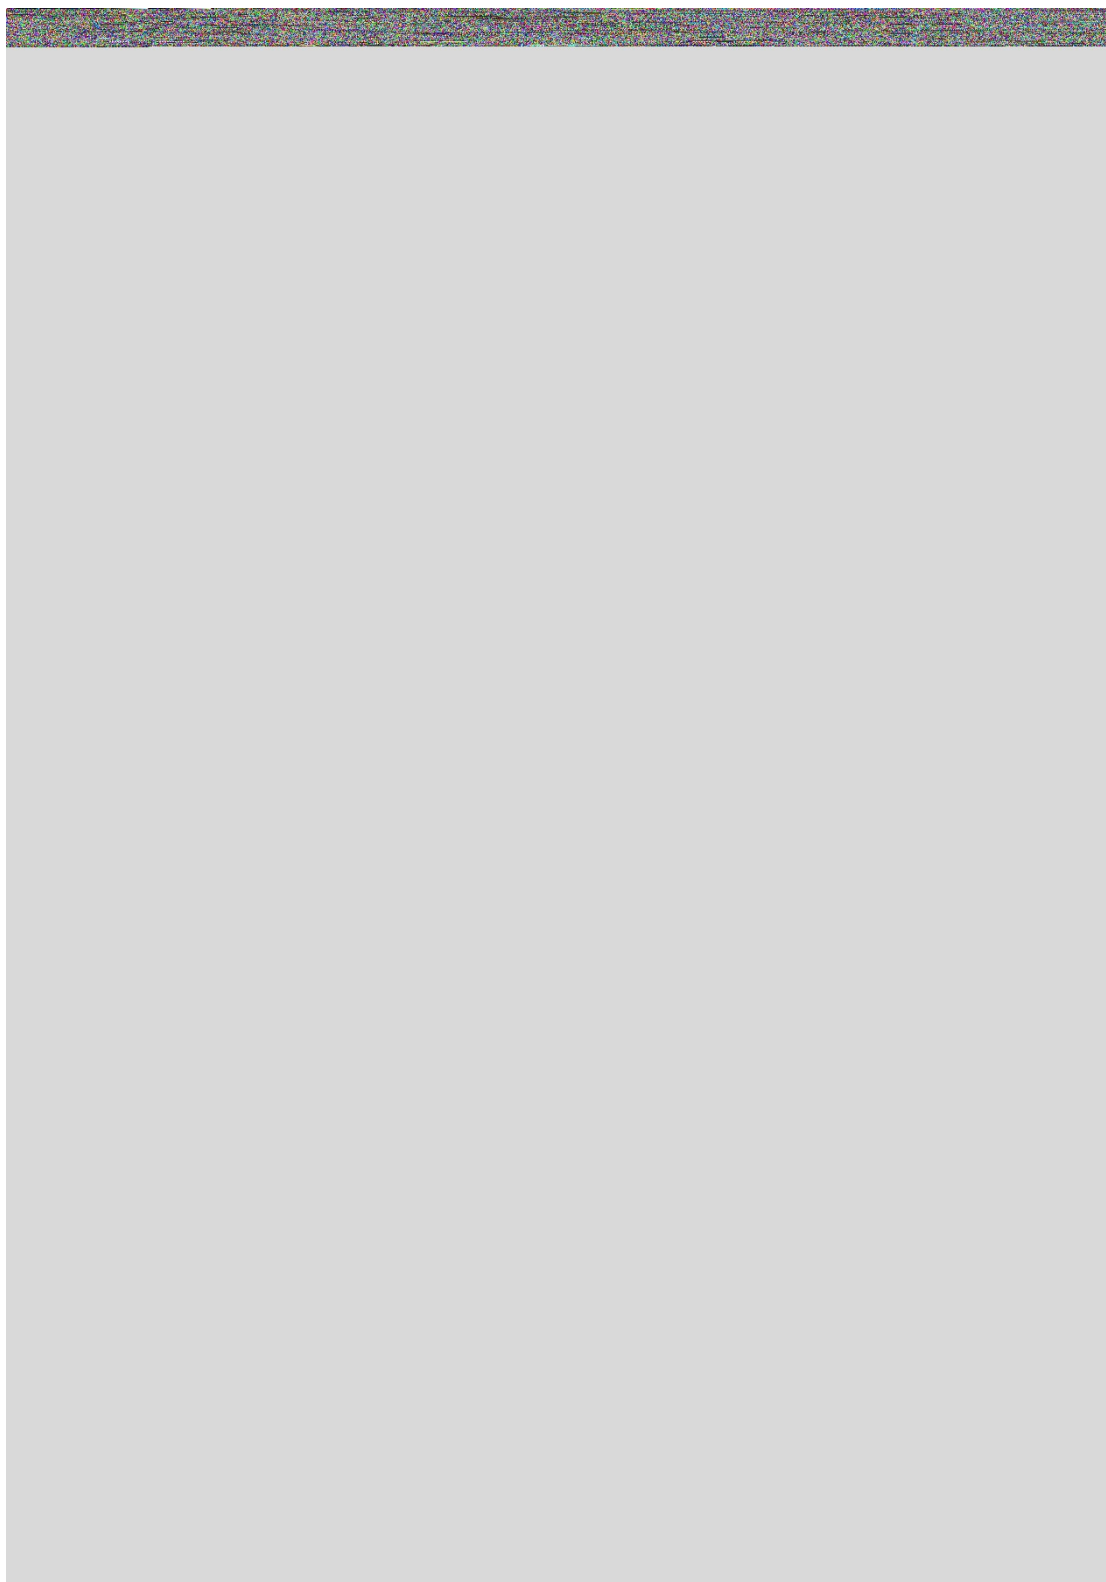

**$^{31}\text{P}$  NMR of Compound 2b**

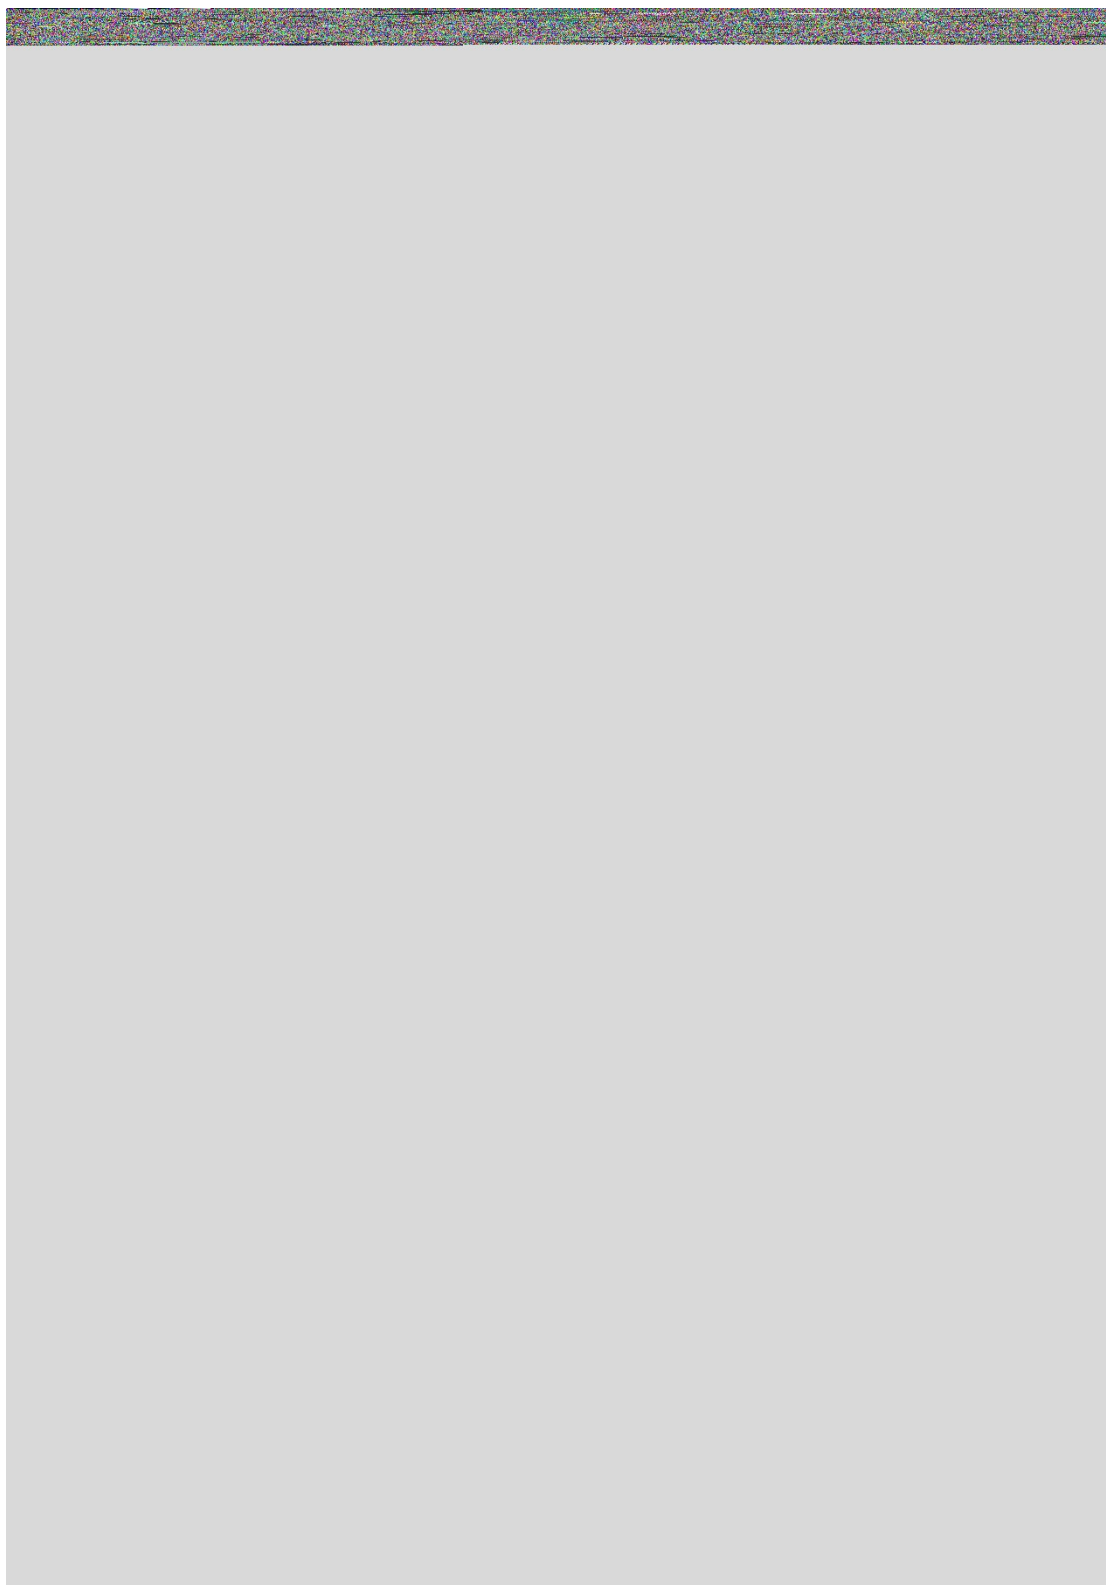

**$^1\text{H}$  NMR of Compound 2b**

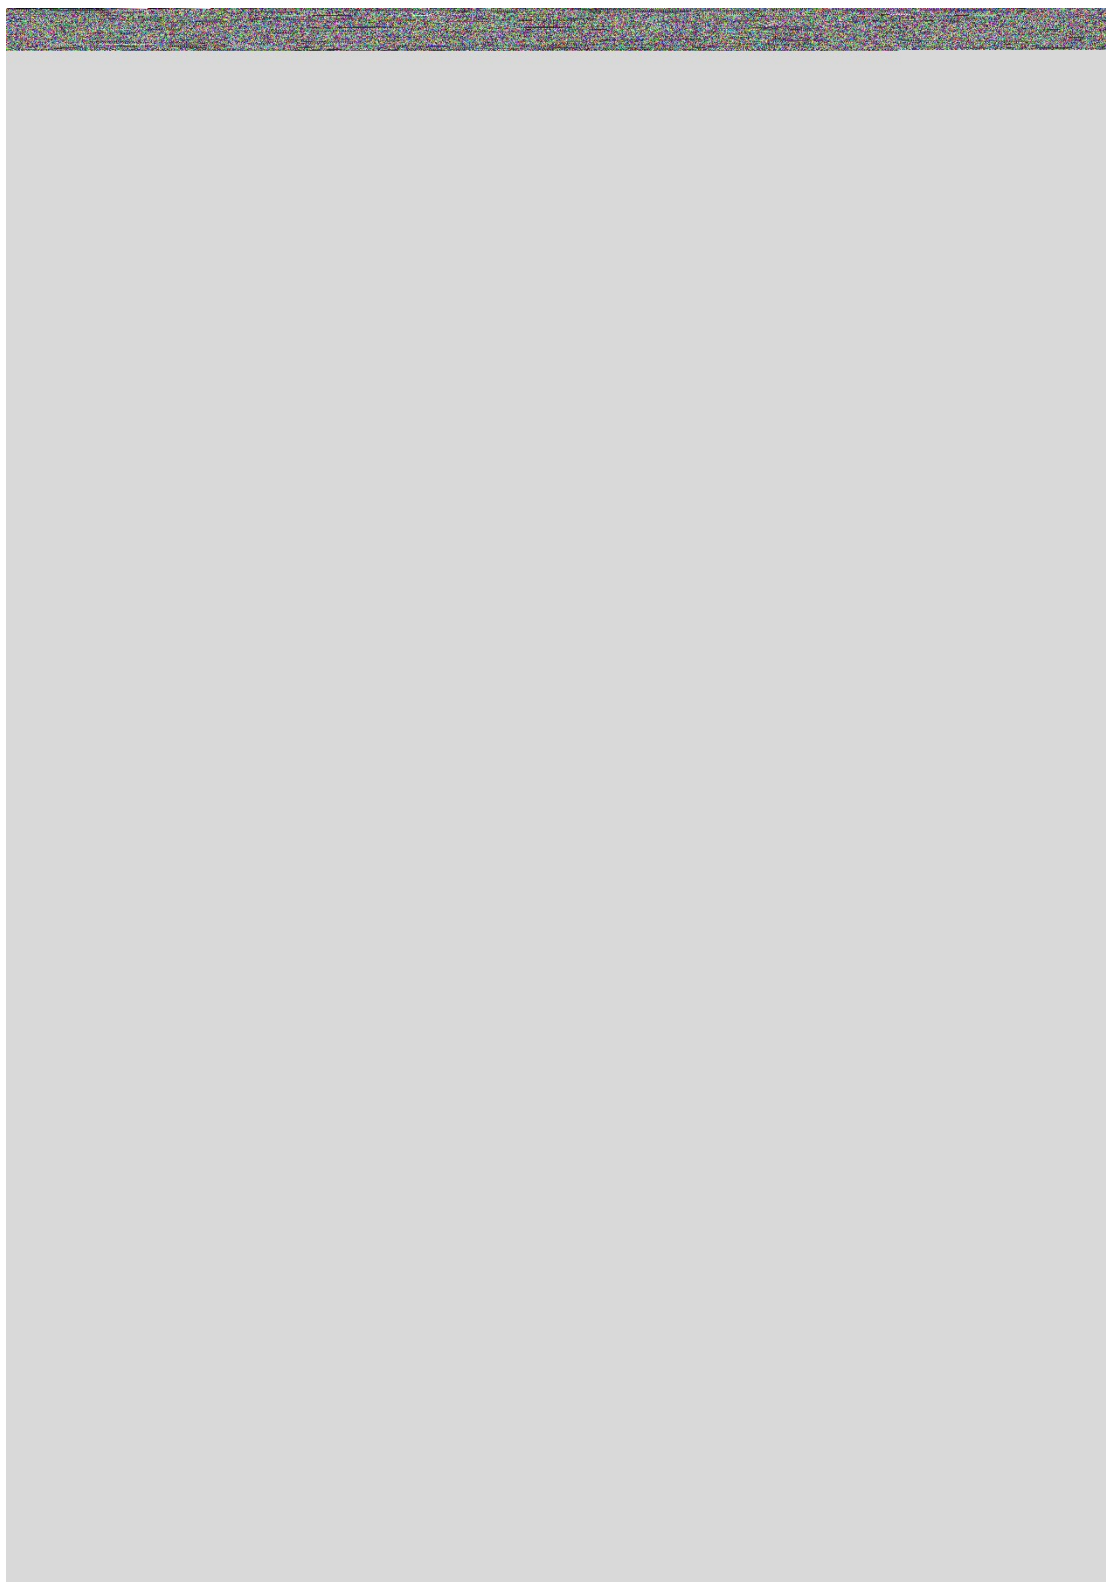

**<sup>13</sup>C NMR of Compound 2b**



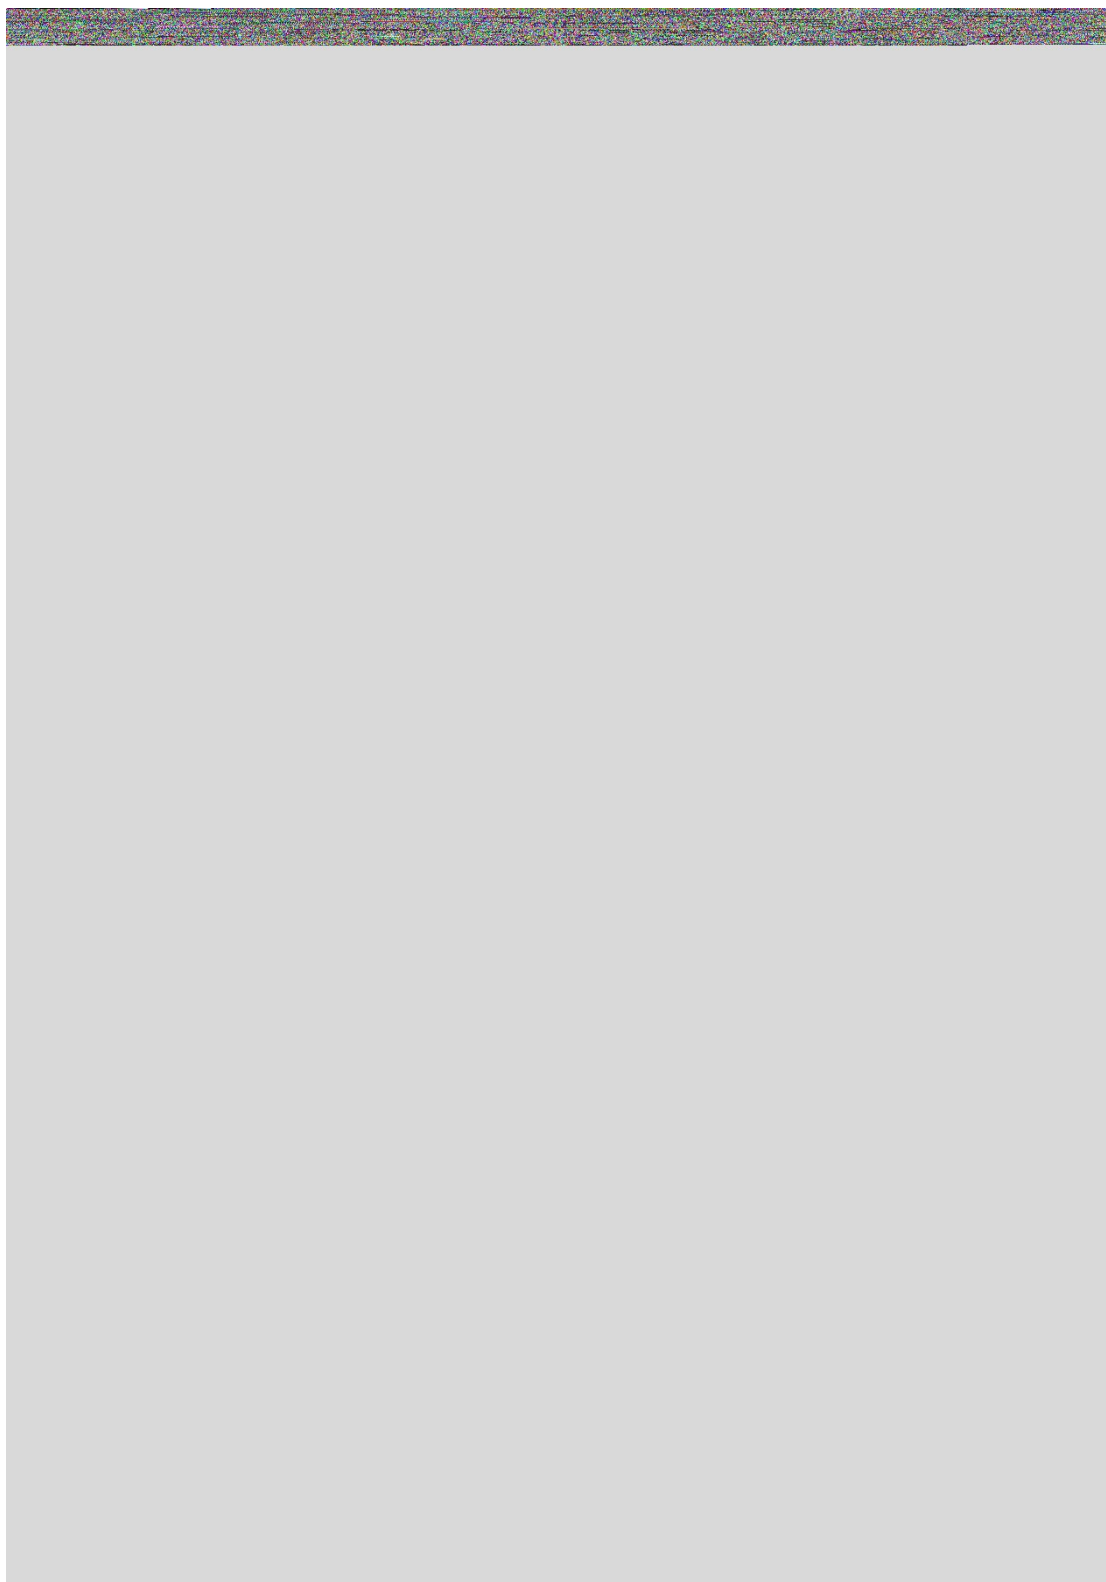

**<sup>31</sup>P NMR of Compound 2c**

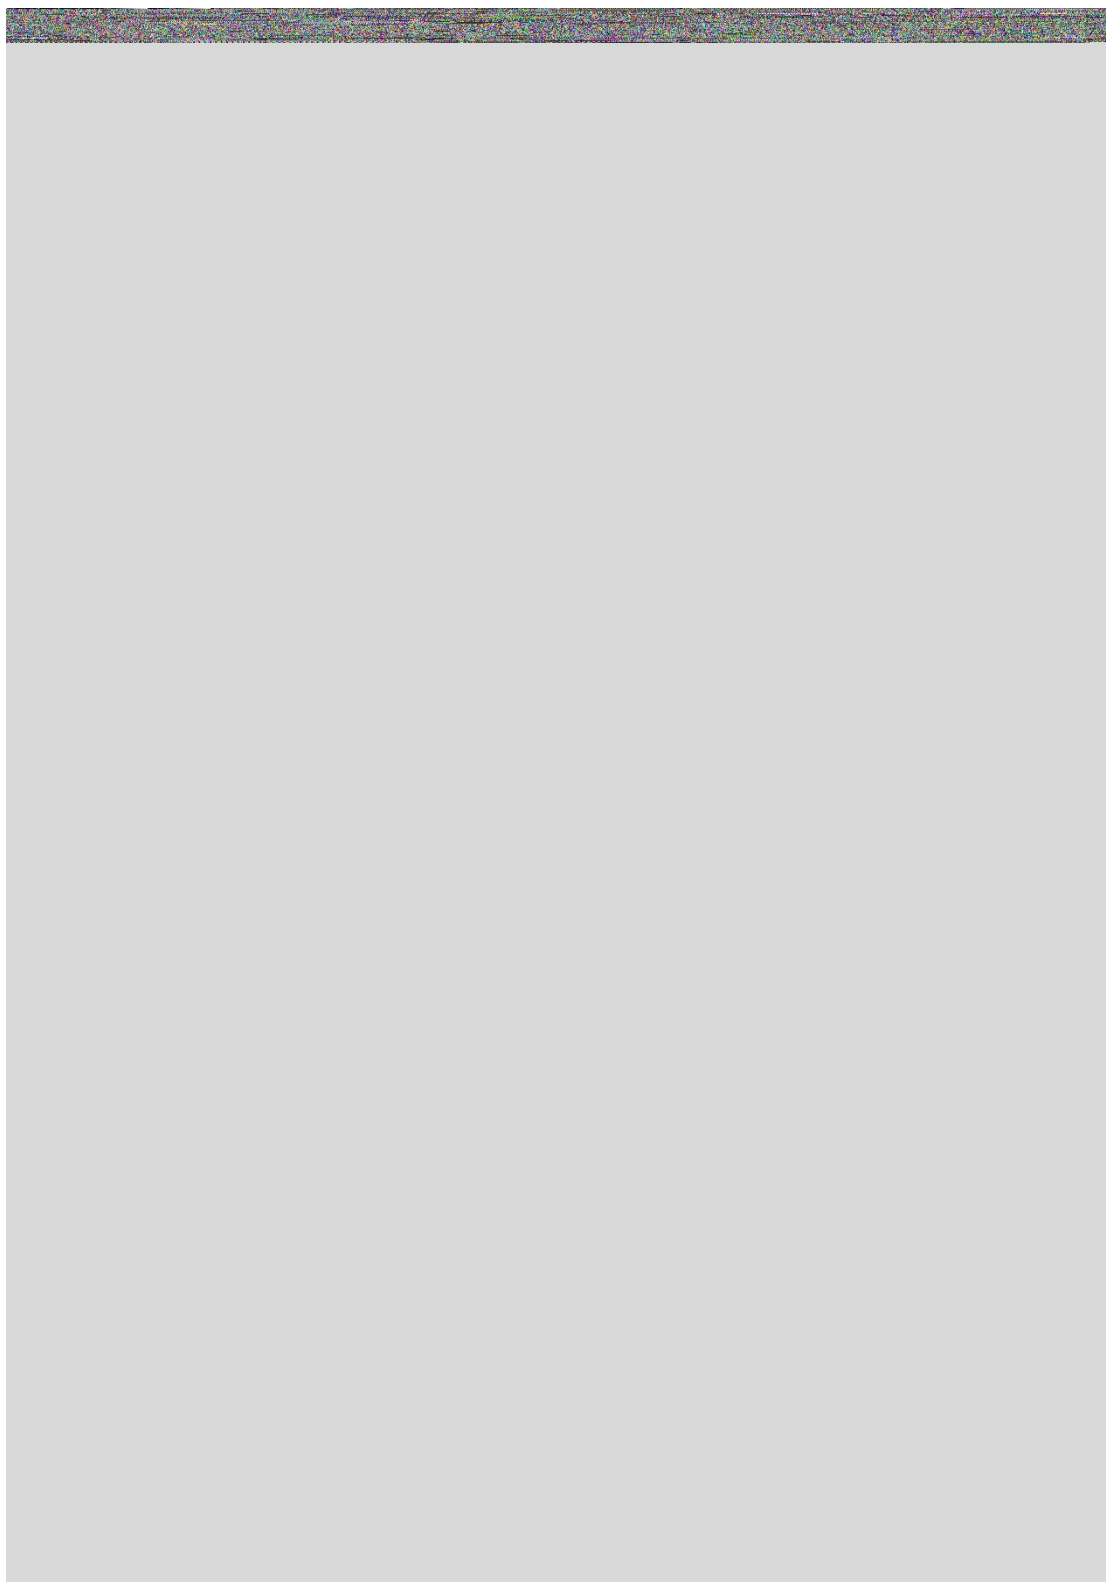

**$^1\text{H}$  NMR of Compound 2c**

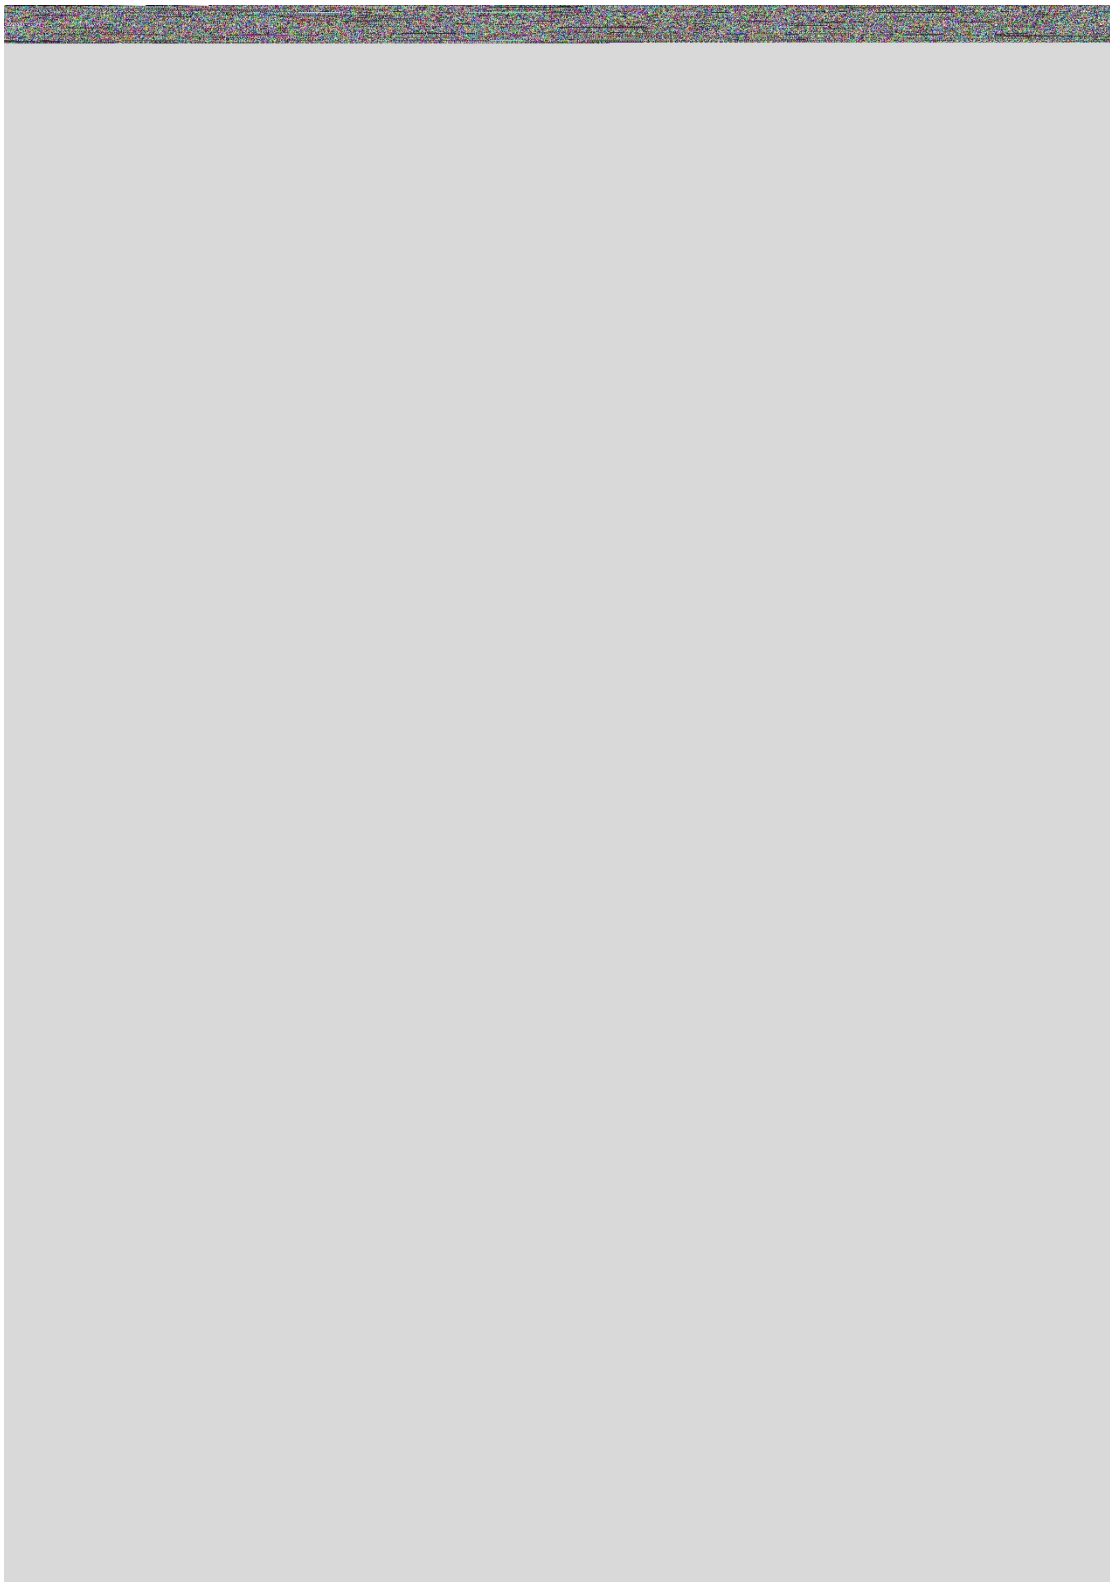

**<sup>13</sup>C NMR of Compound 2c**

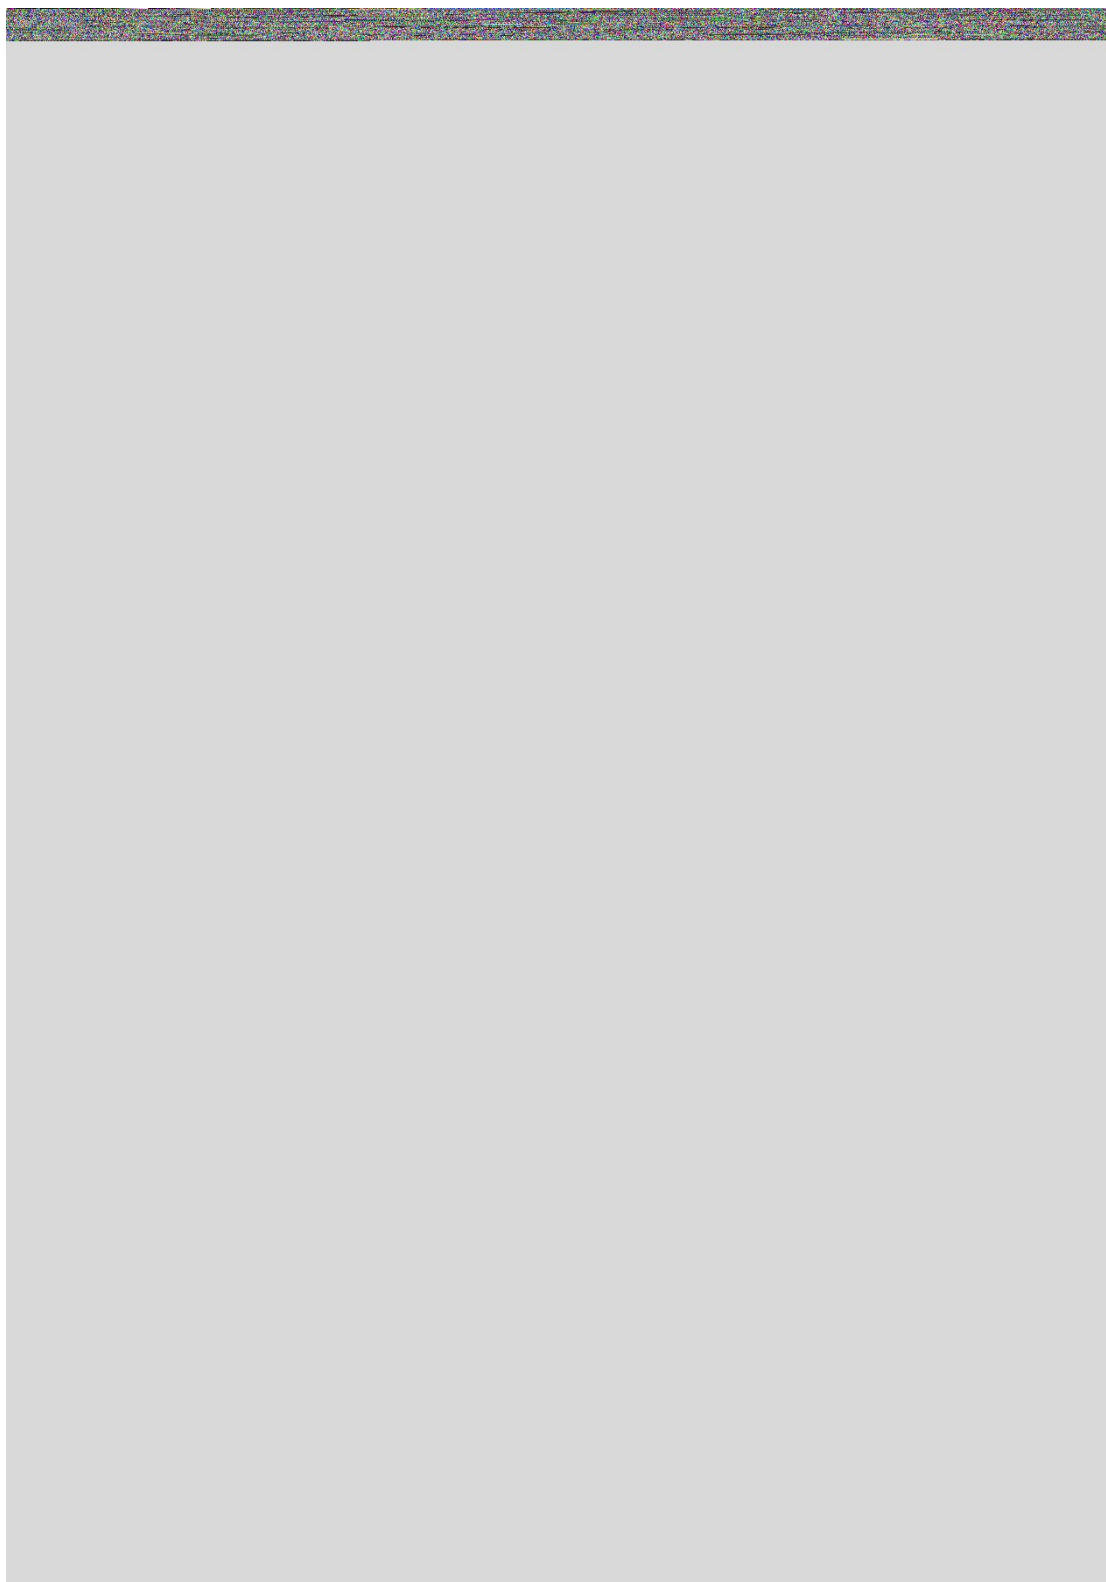

**<sup>31</sup>P NMR of Compound 2d**

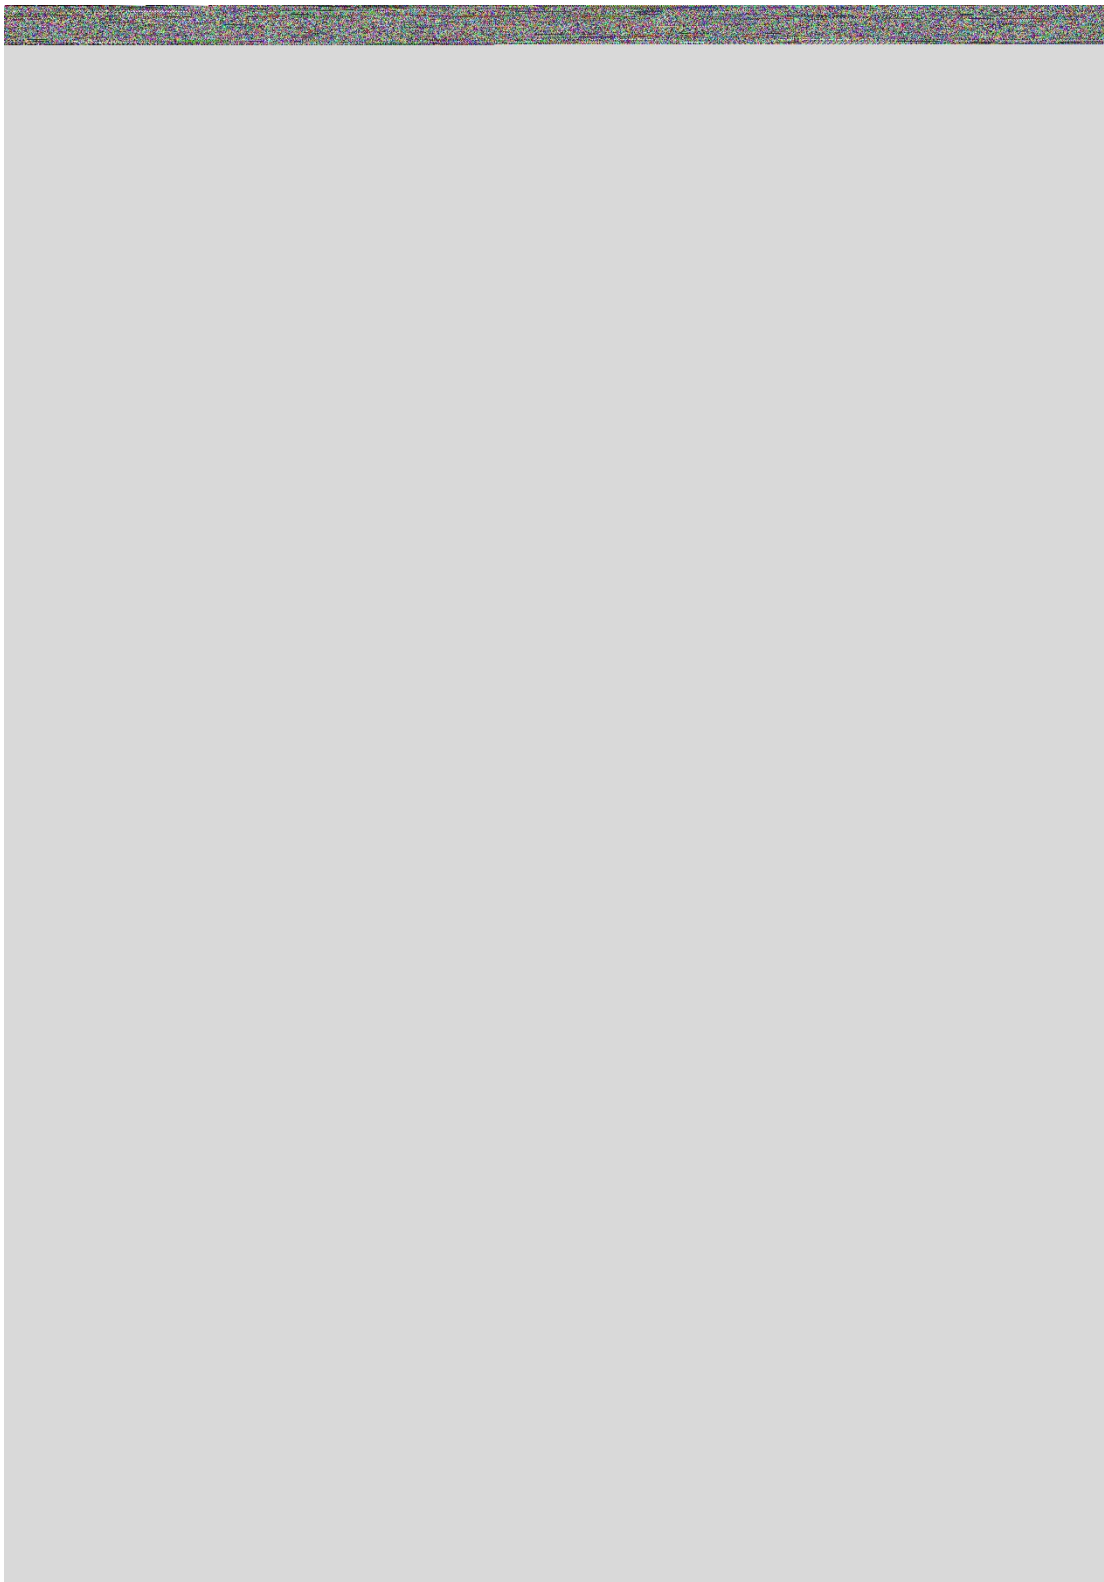

**$^1\text{H}$  NMR of Compound 2d**

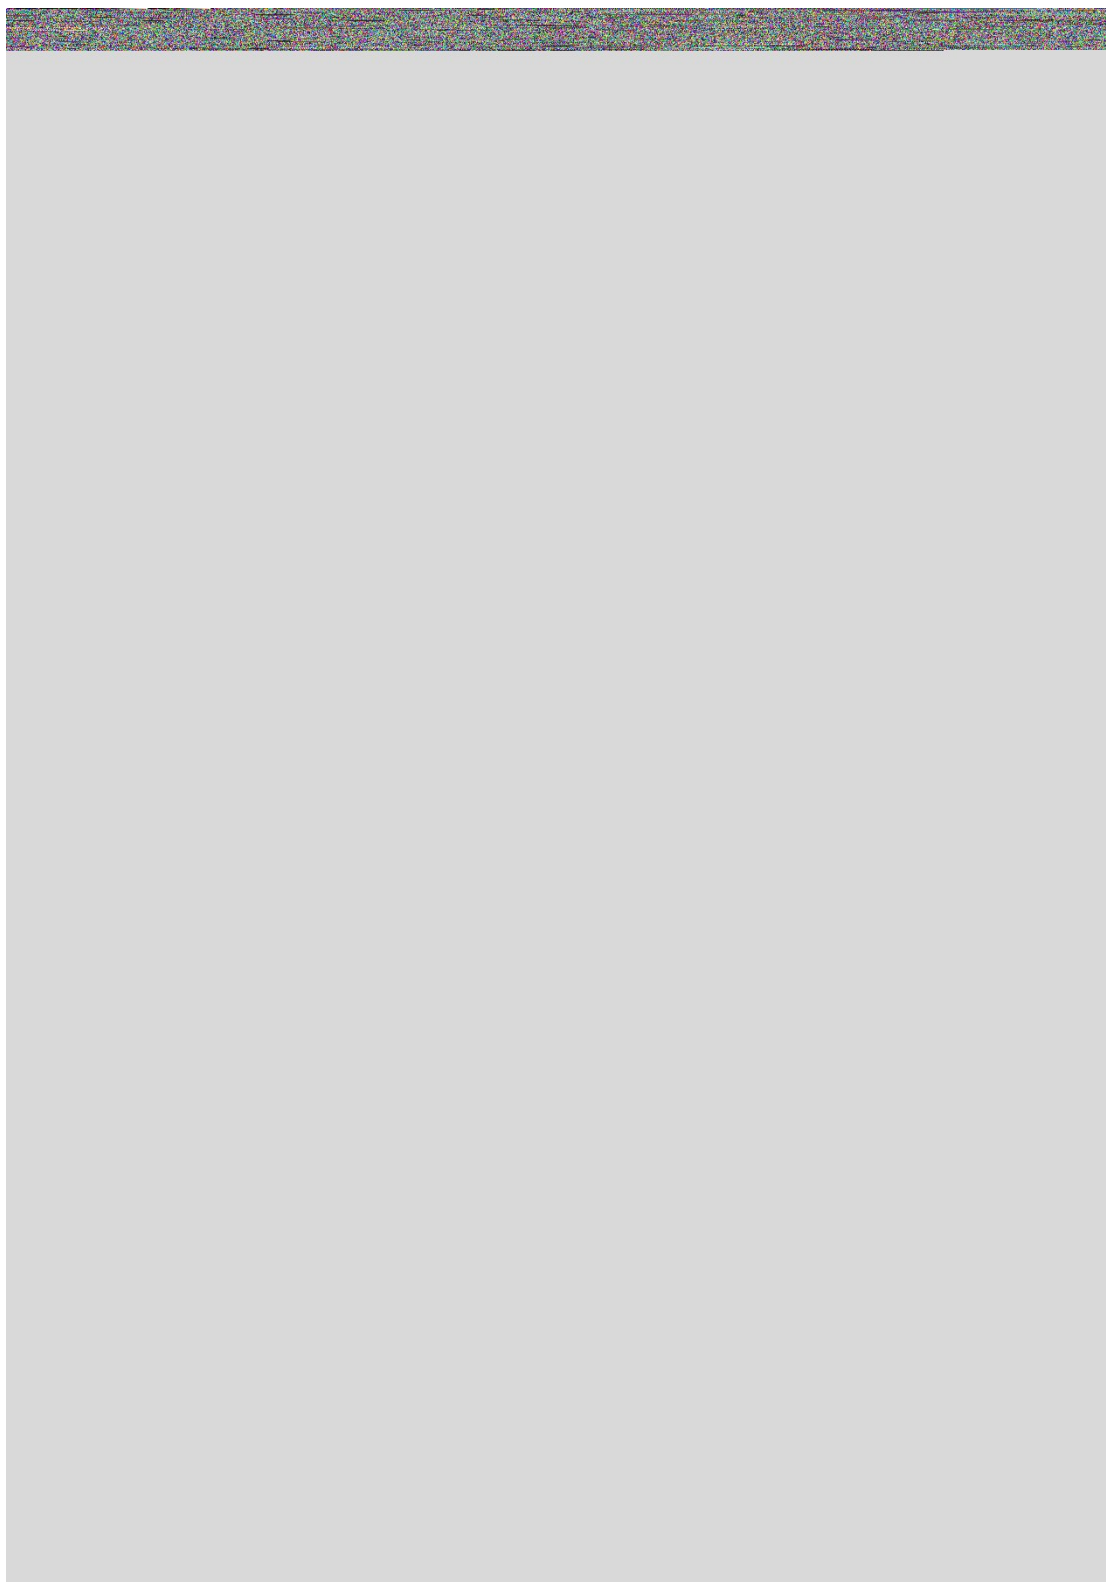

**$^{13}\text{C}$  NMR of Compound 2d**

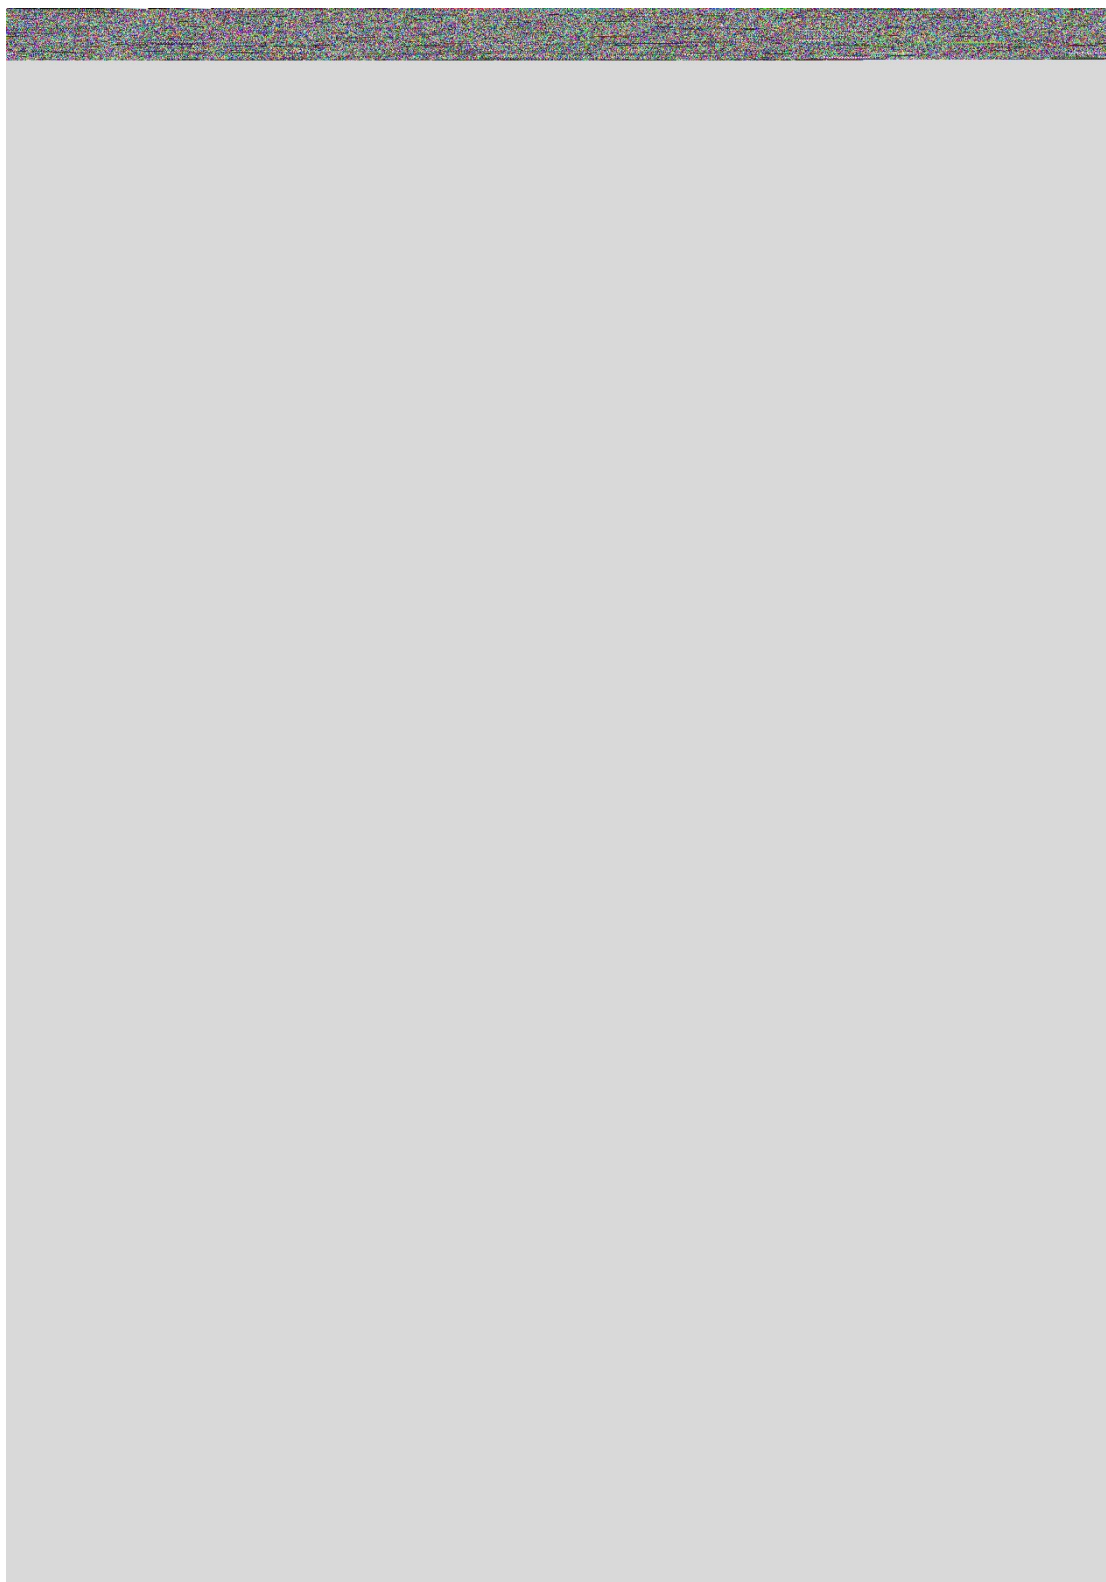

$^{31}\text{P}$  NMR of Compound 4a

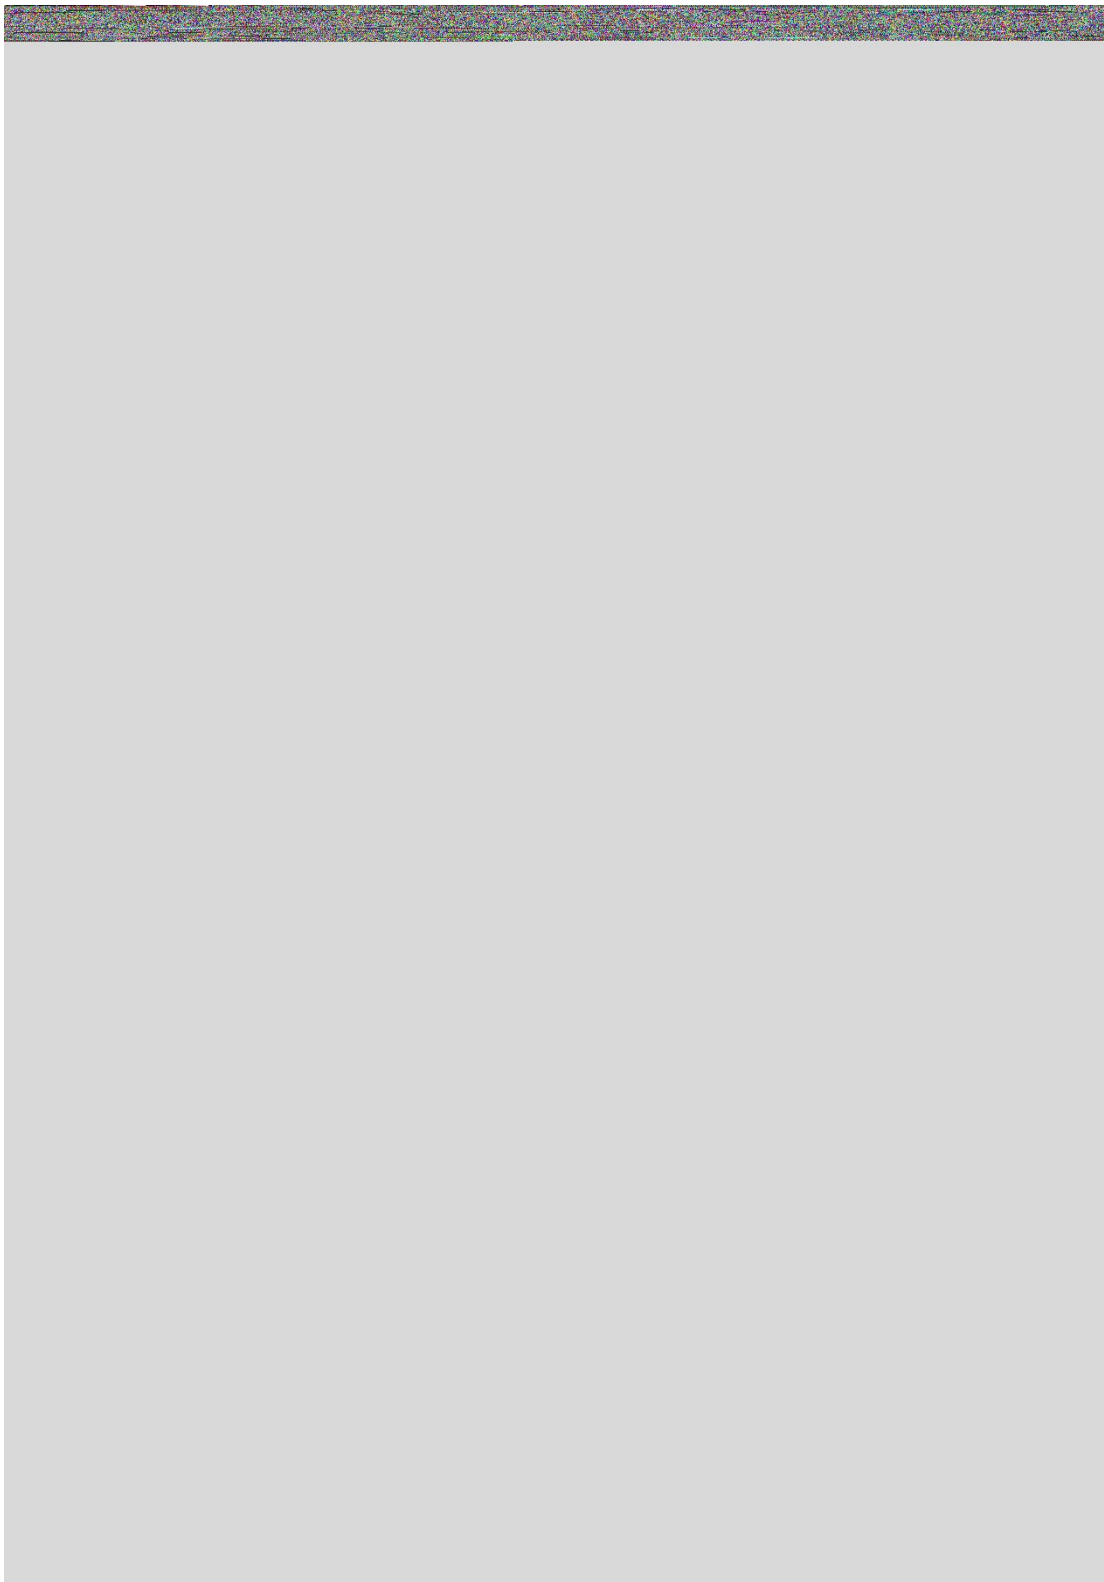

**<sup>1</sup>H NMR of Compound 4a**



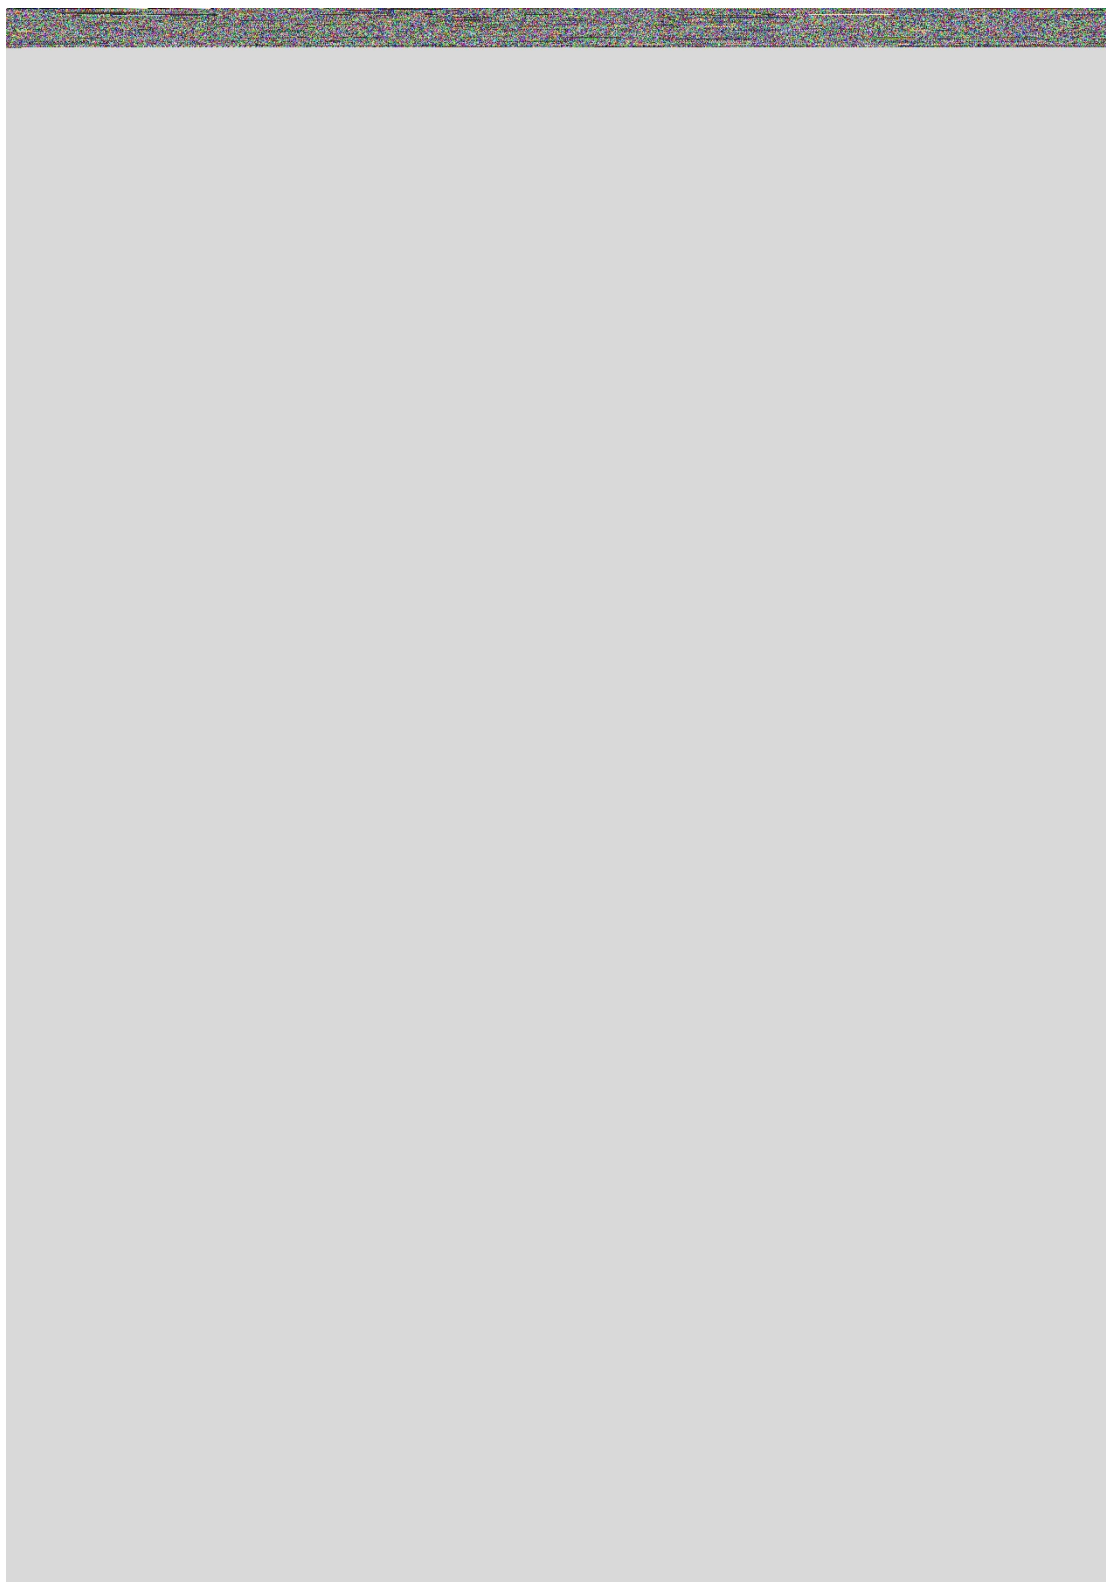

**<sup>13</sup>C NMR of Compound 4a**

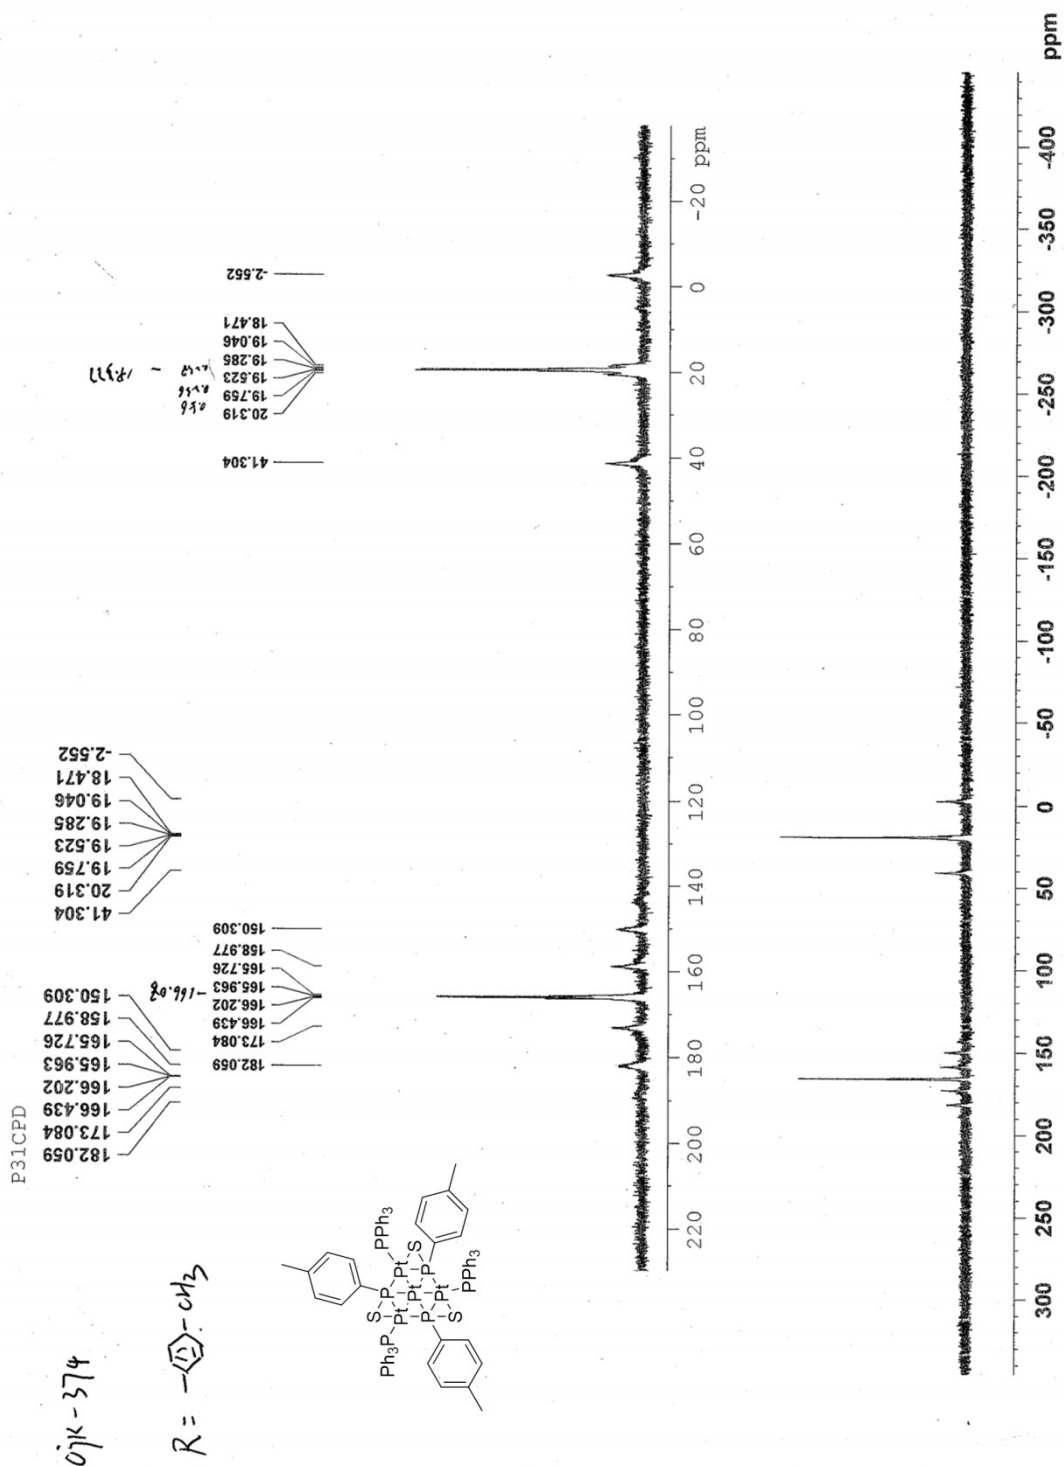

<sup>31</sup>P NMR of Compound 4b

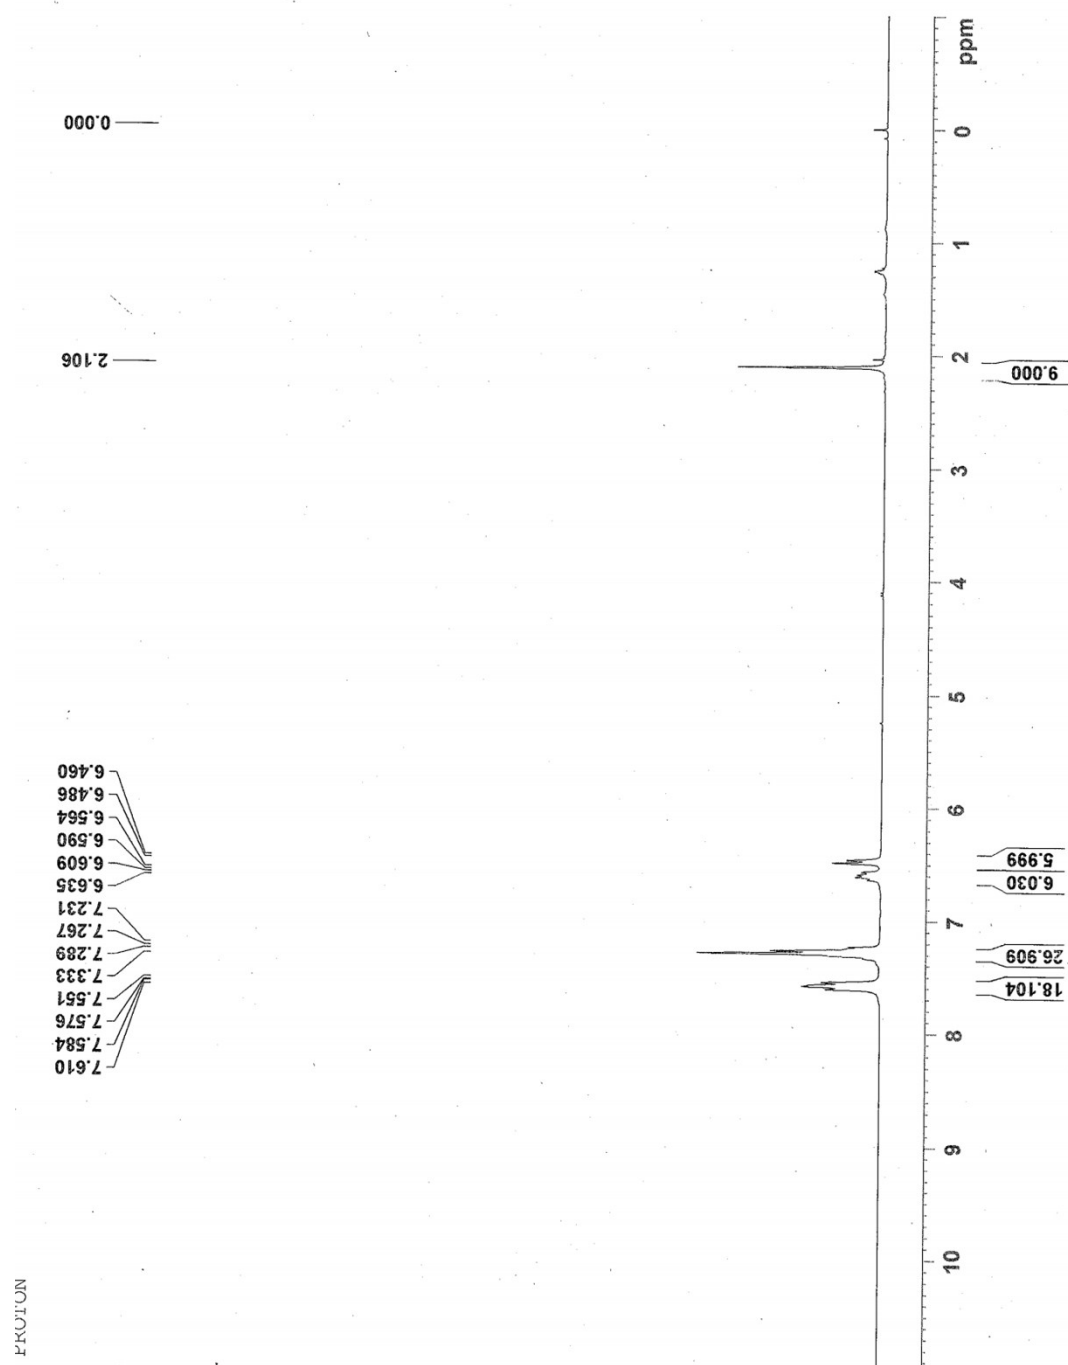

<sup>1</sup>H NMR of Compound 4b

C13CPD

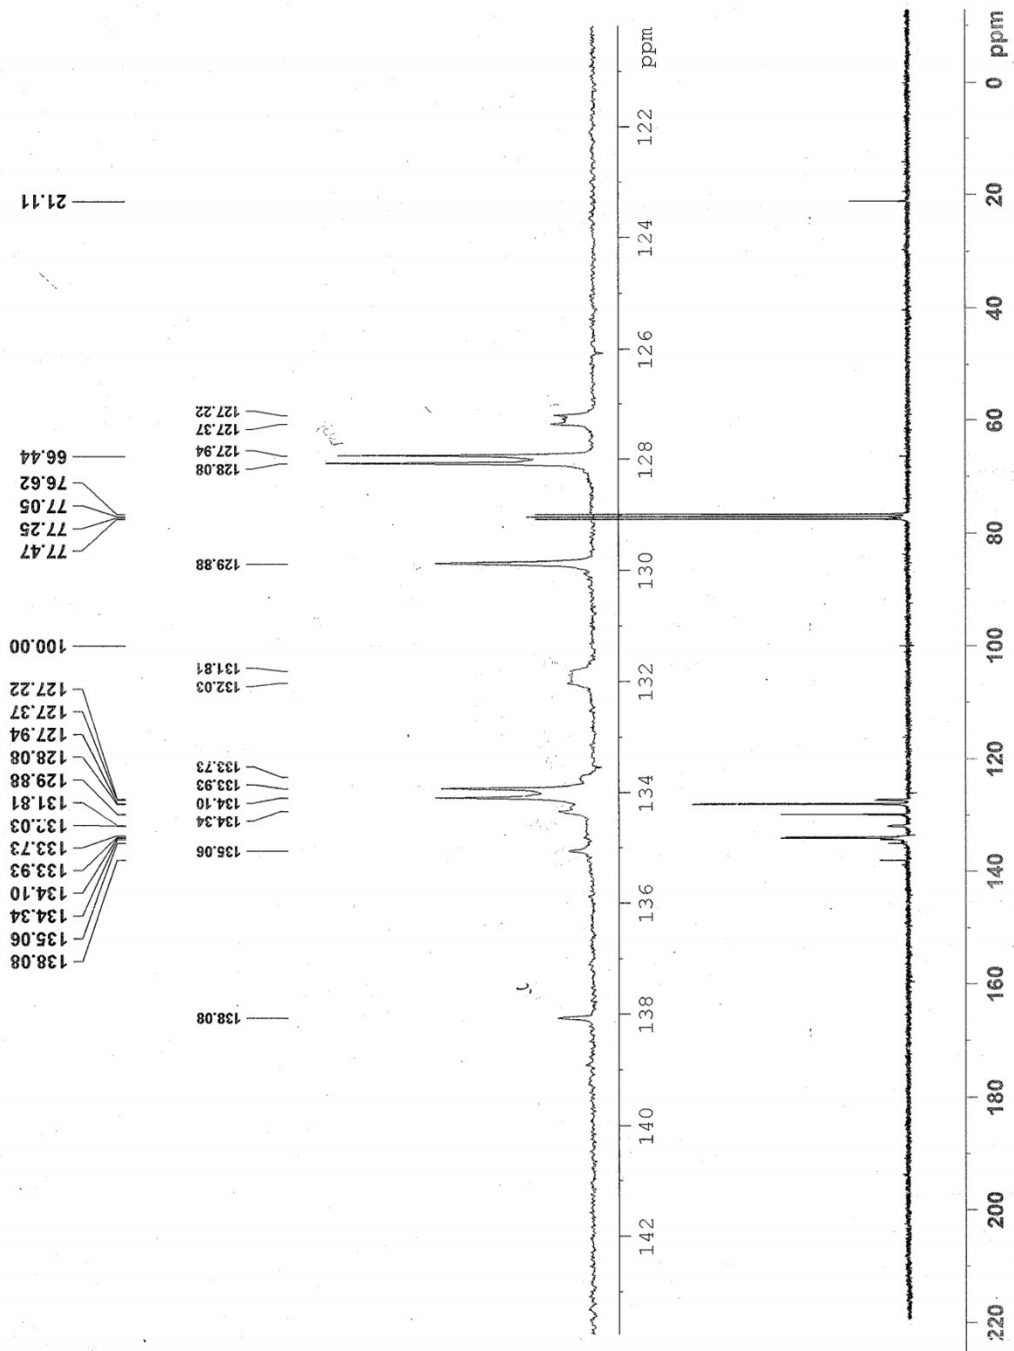

<sup>13</sup>C NMR of Compound 4b

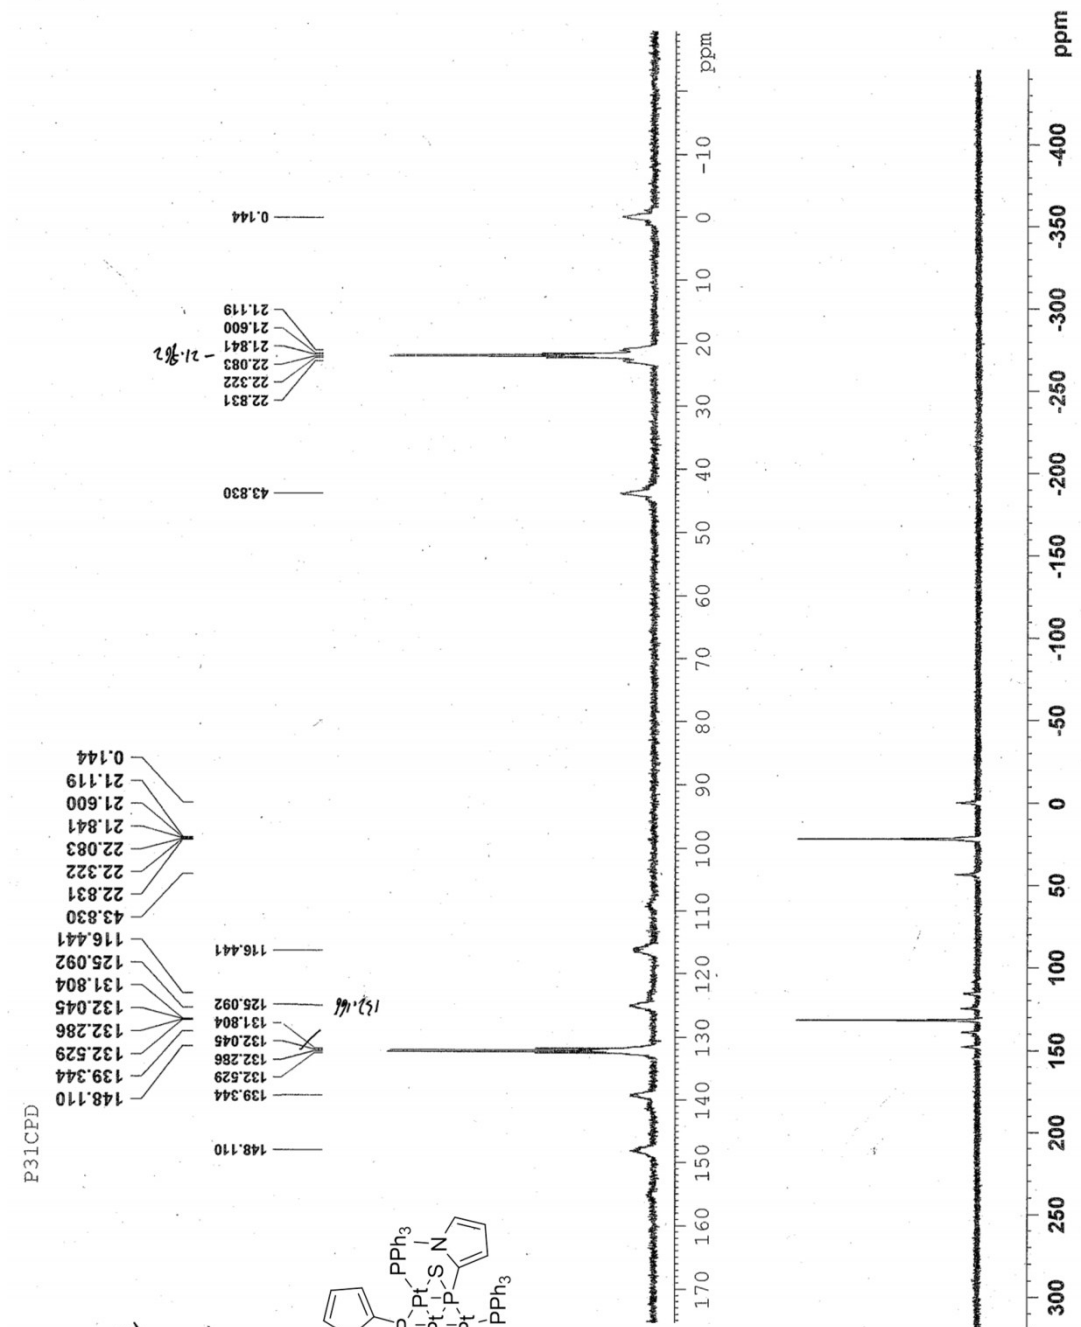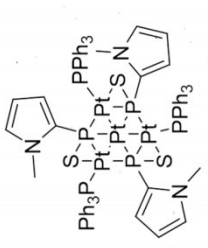

07K-386

Me

R =

<sup>31</sup>P NMR of Compound 4d

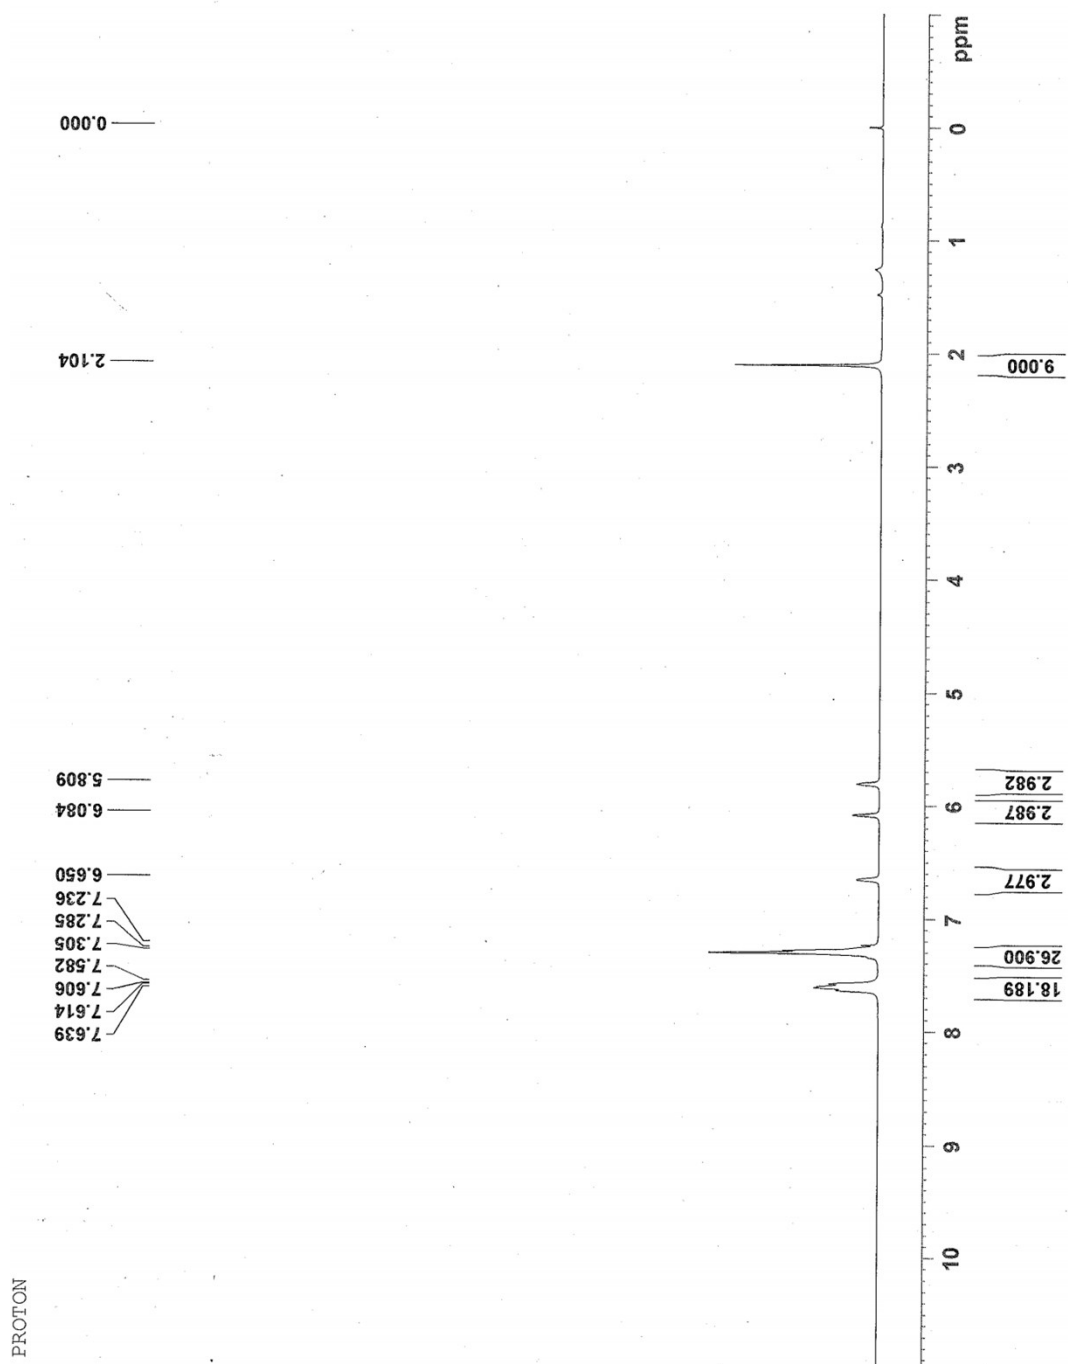

$^1\text{H}$  NMR of Compound 4d

C13CPD

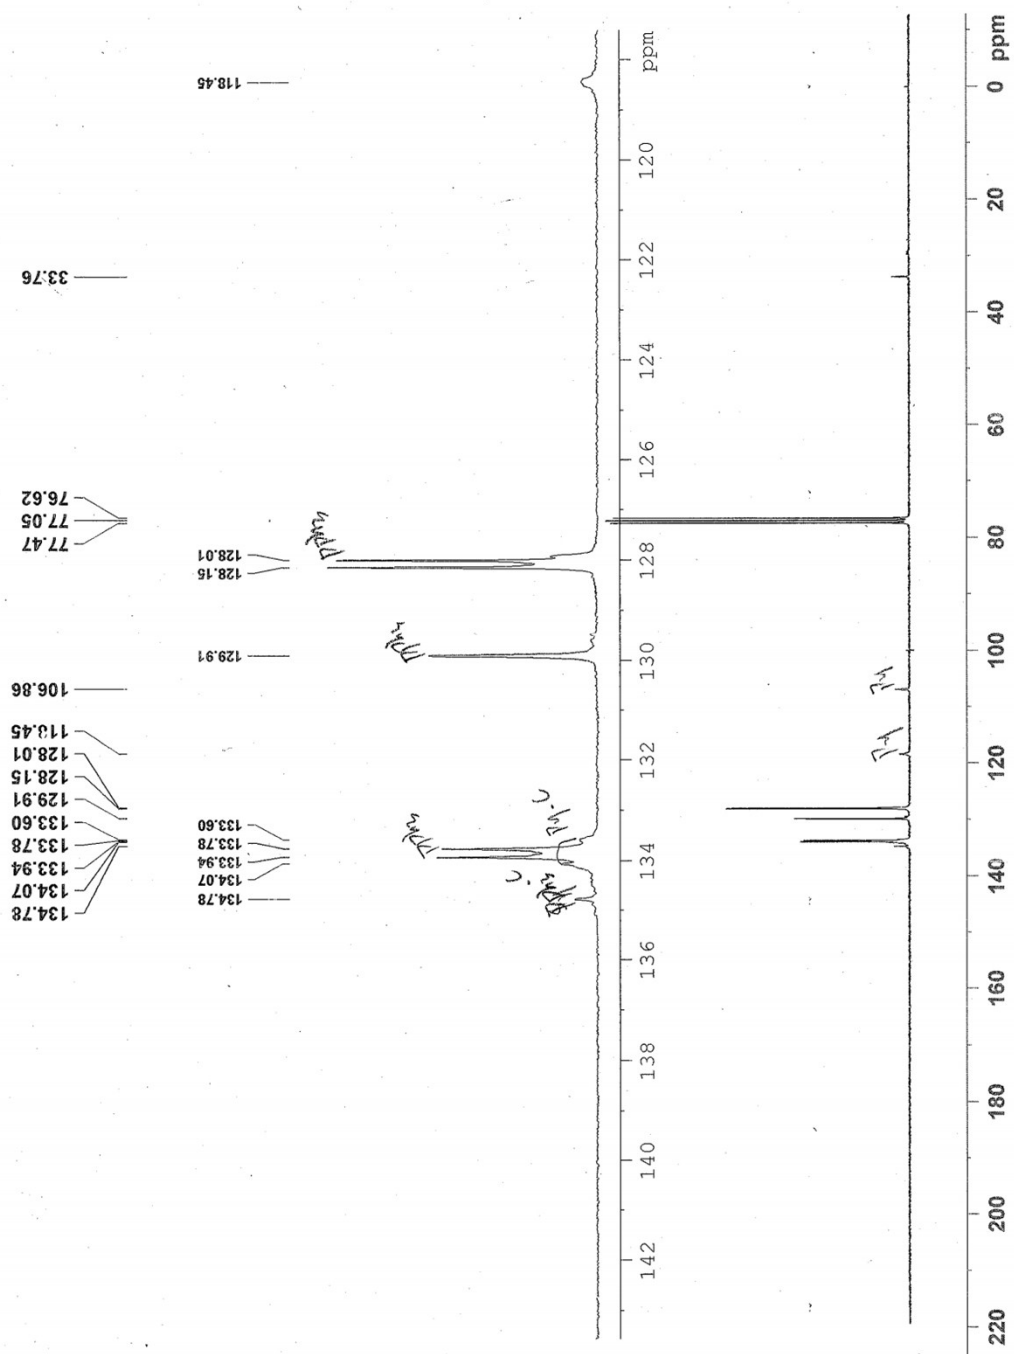

$^{13}\text{C}$  NMR of Compound 4d
